# Supplementary material for: Correlates of help-seeking by parents for the socioemotional development of their 3-year-old children: a longitudinal study
Source: PubMed Central journal article supplement — BMJ Open. 2022 Jan 11;12(1):e052595. doi: 10.1136/bmjopen-2021-052595 (PMC8753387; doi:10.1136/bmjopen-2021-052595), 2022-01-11
Supplement: bmjopen-2021-052595.draft_revisions.pdf [file bmjopen-2021-052595.draft_revisions.pdf]

# BMJ Open

BMJ Open is committed to open peer review. As part of this commitment we make the peer review history of every article we publish publicly available.

When an article is published we post the peer reviewers' comments and the authors' responses online. We also post the versions of the paper that were used during peer review. These are the versions that the peer review comments apply to.

The versions of the paper that follow are the versions that were submitted during the peer review process. They are not the versions of record or the final published versions. They should not be cited or distributed as the published version of this manuscript.

BMJ Open is an open access journal and the full, final, typeset and author-corrected version of record of the manuscript is available on our site with no access controls, subscription charges or pay-per-view fees (<http://bmjopen.bmj.com>).

If you have any questions on BMJ Open's open peer review process please email [info.bmjopen@bmj.com](mailto:info.bmjopen@bmj.com)

# BMJ Open

**Which factors are associated with help-seeking by parents regarding the socio-emotional development of their 3-year-old children: a longitudinal study.**

|                               |                                                                                                                                                                                                                                                                                                                                                                                          |
|-------------------------------|------------------------------------------------------------------------------------------------------------------------------------------------------------------------------------------------------------------------------------------------------------------------------------------------------------------------------------------------------------------------------------------|
| Journal:                      | <i>BMJ Open</i>                                                                                                                                                                                                                                                                                                                                                                          |
| Manuscript ID                 | bmjopen-2021-052595                                                                                                                                                                                                                                                                                                                                                                      |
| Article Type:                 | Original research                                                                                                                                                                                                                                                                                                                                                                        |
| Date Submitted by the Author: | 20-Apr-2021                                                                                                                                                                                                                                                                                                                                                                              |
| Complete List of Authors:     | Luo, Jie; Erasmus Medical Center, Department of Public Health Raat, Hein; Erasmus Medical Center, Department of Public Health Franse, Carmen; Erasmus Medical Center, Department of Public Health Bannink, Rienke; CJG Rijnmond, Afdeling Beleid & Onderzoek BAI, GUANNAN; Erasmus Medical Center, Department of Public Health van Grieken, Amy; Erasmus MC, Department of Public Health |
| Keywords:                     | Child & adolescent psychiatry < PSYCHIATRY, MENTAL HEALTH, PRIMARY CARE                                                                                                                                                                                                                                                                                                                  |
|                               |                                                                                                                                                                                                                                                                                                                                                                                          |

SCHOLARONE™  
Manuscripts

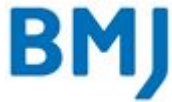

I, the Submitting Author has the right to grant and does grant on behalf of all authors of the Work (as defined in the below author licence), an exclusive licence and/or a non-exclusive licence for contributions from authors who are: i) UK Crown employees; ii) where BMJ has agreed a CC-BY licence shall apply, and/or iii) in accordance with the terms applicable for US Federal Government officers or employees acting as part of their official duties; on a worldwide, perpetual, irrevocable, royalty-free basis to BMJ Publishing Group Ltd ("BMJ") its licensees and where the relevant Journal is co-owned by BMJ to the co-owners of the Journal, to publish the Work in this journal and any other BMJ products and to exploit all rights, as set out in our [licence](#).

The Submitting Author accepts and understands that any supply made under these terms is made by BMJ to the Submitting Author unless you are acting as an employee on behalf of your employer or a postgraduate student of an affiliated institution which is paying any applicable article publishing charge ("APC") for Open Access articles. Where the Submitting Author wishes to make the Work available on an Open Access basis (and intends to pay the relevant APC), the terms of reuse of such Open Access shall be governed by a Creative Commons licence – details of these licences and which [Creative Commons](#) licence will apply to this Work are set out in our licence referred to above.

Other than as permitted in any relevant BMJ Author's Self Archiving Policies, I confirm this Work has not been accepted for publication elsewhere, is not being considered for publication elsewhere and does not duplicate material already published. I confirm all authors consent to publication of this Work and authorise the granting of this licence.

1  
2  
3 **Which factors are associated with help-seeking by parents regarding the socio-emotional**  
4 **development of their 3-year-old children: a longitudinal study.**  
5  
6  
7

8  
9 **List of authors:**  
10

|                                  |                              |                        |
|----------------------------------|------------------------------|------------------------|
| 11 Jie Luo <sup>1</sup>          | 12 j.luo@erasmusmc.nl        | 13 0000-0002-0500-0101 |
| 14 Hein Raat <sup>1</sup>        | 15 h.raat@erasmusmc.nl       | 16 0000-0002-6000-7445 |
| 17 Carmen B. Franse <sup>1</sup> | 18 c.franse@erasmusmc.nl     | 19 0000-0002-7953-7817 |
| 20 Rienke Bannink <sup>2</sup>   | 21 r.bannink@cjgrijnmond.nl  | 22 0000-0002-6980-7107 |
| 23 Guannan Bai <sup>1</sup>      | 24 g.bai@erasmusmc.nl        | 25 0000-0003-0619-7580 |
| 26 Amy van Grieken <sup>1*</sup> | 27 a.vangrieken@erasmusmc.nl | 28 0000-0001-6767-9159 |

29  
30  
31

32 **Affiliations:**

33 <sup>1</sup> Erasmus Medical Center, Department of Public Health, Rotterdam, the Netherlands

34 <sup>2</sup> CJG Rijnmond (Youth Health Care Center), Rotterdam, the Netherlands

35  
36  
37  
38  
39  
40 \* Corresponding Author  
41  
42  
43  
44  
45  
46  
47  
48  
49  
50  
51  
52  
53  
54  
55  
56  
57  
58  
59  
60

## Abstract

**Objectives** Timely parental help-seeking regarding their child's socio-emotional development is associated with a lower rate and lower severity of psychosocial problems in later life. This study aimed to examine factors associated with parental help-seeking for the socio-emotional development of 3-year-old children.

**Design** Retrospective cohort study.

**Setting** Community-based survey in Rotterdam.

**Participants** Of 2305 parents and their 2-year-old children at baseline, 1507 who completed follow-up questionnaires were included in the analyses when children were three years old.

**Outcome measures** Parental help-seeking regarding their child's socio-emotional development and types of formal and informal help sources (e.g. General practitioner, internet) used in the past 12 months were measured. Hierarchical logistic regression models were applied to identify factors associated with parental help-seeking among thirteen predisposing, enabling, and need factors according to Andersen's Behavioral Model.

**Results** In total, 22.6% of parents reported help-seeking in the past 12 months for socio-emotional development of their 3-year-old child; 6.8% addressed formal help sources and 17.5% addressed informal help sources. General practitioner (2.7%) and family (12.5%) were the most frequently used formal and informal sources, respectively. In the full model, predisposing factors associated with a higher odds of parental help-seeking were child's other western ethnic background (OR=1.66, 95%CI: 1.02-2.68) and parental age  $\leq$  29 years old (OR=1.71, 95%CI: 1.01-2.92). No associated factors were found among enabling factors. The need factors associated with a higher odds of parental help-seeking were having previous help-seeking (OR=2.52, 95%CI: 1.83-3.48) and discussing child's socio-emotional development in the well-child visit (OR=2.47, 95%CI: 1.73-3.53).

**Conclusions** Predisposing and need factors were associated with parental help-seeking for socio-emotional development of 3-years-old child. The findings can be used to further develop support for parents accessing adequate information, prevention and anticipatory care with regard to the child's socio-emotional development.

## Strengths and limitations of this study

- The study longitudinally investigated parental help-seeking for socio-emotional development of their 3-year-old child in a large community sample.
- Predisposing, enabling, and need factors following Andersen's Behavioral Model were studied.
- In total 14 formal and informal types of help-seeking behavior for the child's social-emotional development were considered.
- Help-seeking behavior for parent perceived problem behavior of the child was evaluated, instead of clinically diagnosed problem behavior.

## Introduction

Psychosocial problems, such as attention deficit hyperactivity disorders (ADHD), conduct disorders, and anxiety disorders, are relatively common among young children.<sup>1, 2</sup> The literature suggests that 7%–25% of children worldwide experience psychosocial problems in early childhood (0-6 years).<sup>3-8</sup> Significantly, these psychosocial problems can track into adulthood.<sup>9-11</sup> Timely detection of (risk for) psychosocial problems and, consequently, offering appropriate interventions in early childhood can reduce problems and improve children's cognitive and academic performance.<sup>1, 2, 5</sup>

In order to identify psychosocial problems, validated instruments are often used such as the Revised Child Anxiety and Depression Scale (RCADS) for diagnosing anxiety and depression in 8-18 year old children.<sup>12</sup> At younger ages, certain behaviors (e.g. hitting, tantrums) can to some extent be part of the normal healthy development of psychosocial behavior of a child.<sup>13</sup> Therefore, for younger children instruments such as the Brief Infant–Toddler Social and Emotional Assessment (BITSEA) are used to detect 'at risk' behavior. Studies show that children's 'at-risk' behavior can change to not at-risk and vice versa over time.<sup>14, 15</sup> Since young children's ability to express their psychosocial well-being is developing, parents and professionals have an important role in monitoring the child's socio-emotional development<sup>16-18</sup> It is estimated that approximately one-third of parents seek help for the socio-emotional development of their children aged 4 to 11 who are at risk of psychosocial problems.<sup>19-22</sup> It is therefore important that parents take action for their concerns about their child's socio-emotional development to determine whether and what type of support is needed.

1  
2  
3 Help-seeking for such concerns might be guided by several factors, and, in this regard, Andersen  
4 and Newman provide a framework for health service use.<sup>23</sup> The framework postulates that the  
5 behavior of health service use depends on the three core groups of factors: (1) predisposing  
6 factors (demographic and social characteristics); (2) enabling factors (the ability to access  
7 services) and (3) need factors (the internal and external need for health care services). Previous  
8 studies have found that predisposing factors, such as child's ethnic background and gender, are  
9 associated with parental help-seeking.<sup>24-28</sup> Enabling factors, such as parents with higher  
10 educational levels and higher incomes, have been shown to positively encourage parents to seek  
11 help for their child's problem behavior (4-14 years old).<sup>29, 30</sup> An important need factor that has  
12 been reported to increase help-seeking by parents is recognition of the child's problem (6-11  
13 years old).<sup>20, 21, 31</sup> Meanwhile, single-parent families, the high cost of professional mental health  
14 services and the self-stigma of parents have been indicated as barriers to help-seeking for  
15 children's socio-emotional development (3-11 years old).<sup>21, 32-34</sup> Thus far, research about parental  
16 help-seeking for the socio-emotional development has focused on school-aged children (4-12  
17 years old) and adolescents (12-18 years old).<sup>26, 27, 30, 35, 36</sup>

18  
19  
20  
21  
22  
23  
24  
25  
26  
27  
28 The current study aimed to identify factors associated with parental help-seeking regarding the  
29 socio-emotional development of 3-year-old children. Following the Andersen & Newman  
30 framework, we studied the association between parental help-seeking and the three core factors:  
31 predisposing factors, enabling, and need factors. In addition, we explored the formal and informal  
32 help sources used in help-seeking.  
33  
34  
35

## 36 **Methods**

### 37 **Study design and population**

38  
39 For the present study, data were collected by parental questionnaires when the child was 2 years  
40 old and again with a follow up at 3 years old. In 2014 and 2015, parents living in the Rotterdam–  
41 Rijnmond area were invited by letter to participate in the study with their 2-year-old child. Parents  
42 were asked to complete and return the baseline questionnaire accompanied with a signed  
43 informed consent form when they visited the Dutch Preventive Youth Health Care (YHC) center  
44 for their regular well-child visit. In the Netherlands, regular well-child visits are one element of  
45 YHC which is offered free of charge to monitor and promote the health, well-being, and  
46 development of children aged 0-19 years.<sup>36-38</sup> One year later, parents enrolled in the study  
47 received the follow-up questionnaire by e-mail or by mail with the request to return the completed  
48 questionnaire to the researchers in a pre-paid envelope.  
49  
50  
51  
52  
53  
54  
55  
56  
57  
58  
59  
60

1  
2  
3 From November 2014 to August 2015, YHC invited all parents (estimated n=11245 parents) to  
4 participate in the study accompanying the regular well-child visit invitation at child age 2 years. In  
5 total, 8937 parents attended the YHC for their 2-year child well-child visit. Of these, 2316 parents  
6 gave their consent to participate in the study (participation rate=20.6%) and 2305 parents  
7 completed the first questionnaires (response rate=99.5%). At one-year follow-up, 1540 parents  
8 completed the second questionnaire. Children whose questionnaires were filled in by other  
9 caregivers instead of their parents (n=33) were excluded. Thus, 1507 participants were included  
10 in the analyses of this study (see Figure 1).  
11  
12  
13  
14  
15

### 16 Parental help-seeking

17  
18 When the children were 3 years old, parental help-seeking was assessed by asking parents  
19 whether they had sought help in the past 12 months with regard to issues with their child's  
20 behavior or socio-emotional development. Parents could indicate yes/no whether they sought  
21 help at one or more of the following formal and informal help sources: 1) general practitioner (GP),  
22 2) youth protection services, 3) mental health care professionals (e.g., psychiatrist and child  
23 psychiatry outpatient clinic), 4) parenting support service (e.g., parenting courses and pedagogue  
24 service), 5) social worker, 6) family, 7) friend/acquaintance/neighbor, 8) internet, 9)  
25 complementary medicine (e.g., homoeopathy), 10) emergency telephone service, 11) prayer  
26 house (e.g., church, mosque or synagogue). There was an open answer possibility for parents to  
27 report other sources, and answers were recoded into the existing response categories or recoded  
28 into the new generated options: 12) book/magazines, 13) daycare center/school and 14)  
29 specialized medical care (e.g., clinical, rehabilitation). Parents could choose multiple options.  
30 When the parent chose one of the above options, one point was scored. A total score was  
31 generated by summing up all confirmatory responses (range 0-14). Total scores were  
32 dichotomized into 'no' (none confirmatory options) indicating parents did not seek help from any  
33 sources and 'yes' (one or more confirmatory options) indicating parent sought help from one or  
34 more help sources for children's socio-emotional development in the past 12 months.  
35  
36  
37  
38  
39  
40  
41  
42  
43  
44  
45

### 46 Formal and informal help sources

47 The above response categories (1-14) were categorized into formal help sources and informal  
48 help sources. Formal help sources were GP (1), youth protection services (2), mental health care  
49 professionals (3), parenting support service (4), social worker (5), and specialized medical care  
50 (14). The remaining options were categorized as informal help: family (6),  
51 friend/acquaintance/neighbor (7), internet (8), complementary medicine (9), emergency  
52 telephone service (10), prayer house (11), book/magazine (12) and daycare center/school (13).  
53  
54  
55  
56  
57



1  
2  
3 Scores within each category were added up and two variables were generated: 'formal help  
4 source used' and 'informal help source used'. For both variables, the responses were  
5 dichotomized into 'no' (total score=0) and 'yes' (total scores $\geq$ 1).  
6  
7

## 8 Independent factors 9

### 10 *Predisposing factors* 11

12 Predisposing factors included child age, child gender, child ethnic background, and parental age  
13 measured at child-age 2 years. Child age (in months) at time of measurement was calculated  
14 from the date of birth. Child ethnic background (Dutch, other western, non-western) was defined  
15 based on country of birth of both parents according to the Classification of Statistics  
16 Netherlands.<sup>20, 39, 40</sup> When both parents were born in the Netherlands, the child was considered  
17 to have a Dutch background. When one parent was born outside the Netherlands, this country of  
18 birth determined child's ethnic background. When both parents were born outside the Netherlands,  
19 mother's country of birth determined the child's ethnic background.<sup>20, 39</sup> Parental age (in years)  
20 was reported by parents at baseline and classified into three categories based on the distribution:  
21 '>=40 years', '30-39 years' and '<=29 years'.  
22  
23  
24  
25  
26  
27  
28

### 29 *Enabling factors* 30

31 Enabling factors assessed at 24 months included parental educational level, parental work status,  
32 and family composition. Parental educational level was measured by one item asking about the  
33 highest level of education finalized by the respondent (mother or father) at 24 months. Educational  
34 level was categorized as high (higher vocational education, university), middle (higher secondary  
35 education, vocational education) or low (primary education, lower secondary education).<sup>20, 40</sup>  
36 Parental work status was classified as 'employed (including full-time job and part-time job)' and  
37 'unemployed'. Family composition was categorized into two-parent family or one-parent family.  
38  
39  
40  
41  
42

### 43 *Need factors* 44

45 Need factors assessed at 24 months included the BITSEA Problem and Competence scale,  
46 stressful life events, child's general health, parental satisfaction of child's development, previous  
47 help-seeking and discussing child's socio-emotional development in the well-child visit.  
48  
49

50 The BITSEA consists of a 31-item Problem scale and an 11-item Competence scale which  
51 measures psychosocial well-being in children 12-36 months. Each item is scored 0 for 'not true',  
52 1 for 'somewhat true', and 2 for 'certainly true'.<sup>41</sup> The items from the two scales of BITSEA are  
53 summed up independently. A score of 14 or higher on the Problem scale was categorized as 'at  
54  
55  
56  
57

1  
2  
3 risk of psychosocial problems', and a score of 15 or lower on the competence scale was termed  
4 as 'at risk of competence delay'.<sup>42, 43</sup>  
5

6  
7 Stressful life events were measured by assessing the occurrence of twelve stressful life events,  
8 such as a family relocation, divorce, or financial problem. If an event had happened, parents  
9 indicated when the specific life event happened: last year, 1-2 years ago, 3-4 years ago, or more  
10 than 4 years ago. When parents confirmed the occurrence of one event within the past two years  
11 (the first two options), one point was scored. If one event happened two years ago, then the event  
12 was not counted as a stressful life event for the child. A total score was calculated by summing  
13 up the points assigned. The stressful life events variable was generated with two categories based  
14 on the total score: total score 0 indicating 'no' and  $\geq 1$  'yes'.  
15  
16  
17  
18

19  
20 The child's general health (good vs poor) and parental satisfaction of the child's development (yes  
21 vs no) were measured by two subscales of the Infant Toddler Quality of Life Questionnaire of 47  
22 items (ITQOL-SF47).<sup>44</sup> According to the user manual, the raw scores of each variable were  
23 transformed and dichotomized. The scores above the cut-off point indicated a child's good general  
24 health and parent-satisfied development, respectively.<sup>45</sup>  
25  
26  
27  
28

29 Previous help-seeking was assessed at 24 months with the question: 'Have you sought help for  
30 your child due to his/her socio-emotional development from the following sources in the past two  
31 years?'. The answer options (1-14) were the same as the help-seeking question at 36 months.  
32 These options were re-categorized in the same way: 'no' (none confirmatory options) and 'yes'  
33 (one or more confirmatory options).  
34  
35  
36

37 The discussion of the child's socio-emotional development in the well-child visit was measured  
38 by one question: 'During the regular well-child visit with YHC when the child was two years old,  
39 were any specifics regarding your child's behavior, social, and emotional development discussed?'  
40 The options were 'no' and 'yes'.  
41  
42  
43

#### 44 Patient and public involvement statement

45 Neither patients nor the public was involved in the planning, design, conduct or reporting of this  
46 study.  
47  
48

#### 49 Statistical analysis

##### 50 *Data analysis*

51  
52 Descriptive statistics were used to describe the characteristics of the study population. Hieratical  
53 logistic regression models were fitted to investigate the associated factors of help-seeking. All  
54  
55  
56  
57

1  
2  
3 categorized variables were included as the independent variables by block. The first model (model  
4 1) regarded predisposing variables as independent variables. The second model (model 2)  
5 additionally included enabling variables as independent variables. Finally, a third full model  
6 (model 3) with all variables from the three blocks was fitted. Descriptive statistics were used to  
7 describe formal and informal help-seeking of parents.  
8  
9  
10

11 Furthermore, we assessed interactions between the 13 factors (potentially associated with help-  
12 seeking behaviour) and child gender, child ethnic background, parental age, and parental  
13 education level with regard to the association with help-seeking. After applying Bonferroni  
14 correction for multiple testing ( $p=0.05/42=0.001$ ), no statistically significant interactions were  
15 found. All *P*-values of the interaction analyses are presented in Supplementary Table S1. A non-  
16 response analysis was conducted to assess differences between participants participating in  
17 follow-up and those lost to follow-up in Supplementary Table S2.  
18  
19  
20  
21  
22

23 A *p*-value <0.05 was considered to be statistically significant. All analyses were completed using  
24 the IBM SPSS version 25 (IBM Corp., Armonk, NY, USA).  
25  
26

### 27 *Missing data*

28

29 Regarding the missing data among the sample of 1507 children, multiple imputation by Fully  
30 Conditional Specification (FCS) was used to deal with the missing values on all independent  
31 variables in SPSS.<sup>46-48</sup> The pooled results of five imputed datasets were used. Finally, we  
32 conducted logistic regression analysis on complete-case data as a sensitivity analysis to check  
33 the robustness of results.  
34  
35  
36  
37  
38  
39  
40  
41  
42  
43  
44  
45  
46  
47  
48  
49  
50  
51  
52  
53  
54  
55  
56  
57  
58  
59  
60

## Results

### Characteristics of the study population

Of all parents, 22.6% (n=341) reported help-seeking in the past 12 months for their 3-year-old child's psychosocial health; 6.8% (n=103) addressed formal help sources and 17.5% (n=264) addressed informal help sources. As for children, the mean age was 24.5 (SD=1.8) months (Table 1). Half of the children were boys (49.4%), 80.2% were Dutch, and 93.8% of the children lived in a two-parent family. Most parents were 30-39 years old (70.1%), employed (81.2%), and 59.6% had a high educational level.

Regarding comparison between parents with help-seeking experience and their counterparts, two predisposing factors child age ( $p>0.05$ ) and child gender ( $p>0.05$ ) were not significantly different.

Compared to participants lost in the follow-up (n=775), participants in the follow-up (n=1540) were, as a child, more likely to be at a younger age and have a Dutch ethnic background and, as a parent, to be at an older age and have a higher educational level (all  $p<0.001$ ). No significant differences were found between boys and girls ( $p>0.05$ ) (Supplementary Table S2).

Table 1. Characteristics of the study population (n=1507)

| Items                       | Total                          | Help-seeking                      |                                   | p value |
|-----------------------------|--------------------------------|-----------------------------------|-----------------------------------|---------|
|                             | (n=1507)<br>Mean $\pm$ SD N(%) | No (n=1166)<br>Mean $\pm$ SD N(%) | Yes (n=341)<br>Mean $\pm$ SD N(%) |         |
| <b>Predisposing Factors</b> |                                |                                   |                                   |         |
| Child age in months         | 24.5 $\pm$ 1.8                 | 24.5 $\pm$ 1.8                    | 24.5 $\pm$ 1.9                    | 0.802   |
| Child gender                |                                |                                   |                                   | 0.566   |
| Boys                        | 739 (49.4)                     | 568 (49.0)                        | 171 (50.7)                        |         |
| Girls                       | 758 (50.6)                     | 592 (51.0)                        | 166 (49.3)                        |         |
| Child ethnic background     |                                |                                   |                                   | 0.026*  |
| Dutch                       | 1161 (80.2)                    | 917 (81.7)                        | 244 (75.1)                        |         |
| Other western               | 107 (7.4)                      | 75 (6.7)                          | 32 (9.8)                          |         |
| Non-western                 | 179 (12.4)                     | 130 (11.6)                        | 49 (15.1)                         |         |
| Parental age in years       |                                |                                   |                                   | 0.003** |
| $\geq$ 40                   | 166 (11.1)                     | 140 (12.1)                        | 26 (7.7)                          |         |
| 30-39                       | 1048 (70.1)                    | 818 (70.6)                        | 230 (68.0)                        |         |
| $\leq$ 29                   | 282 (18.9)                     | 200 (17.3)                        | 82 (24.3)                         |         |
| <b>Enabling Factors</b>     |                                |                                   |                                   |         |
| Parental educational level  |                                |                                   |                                   | 0.003** |
| High                        | 883 (59.9)                     | 710(62.3)                         | 173 (52.0)                        |         |
| Middle                      | 498 (33.8)                     | 362 (31.8)                        | 136 (40.8)                        |         |
| Low                         | 92 (6.2)                       | 68 (6.0)                          | 24 (7.2)                          |         |

|    |                                                                           |             |             |            |            |
|----|---------------------------------------------------------------------------|-------------|-------------|------------|------------|
| 1  |                                                                           |             |             |            |            |
| 2  |                                                                           |             |             |            |            |
| 3  | Parental work status                                                      |             |             |            | < 0.001*** |
| 4  | Employed                                                                  | 1195(81.8)  | 947 (83.9)  | 248 (74.7) |            |
| 5  | Unemployed                                                                | 266 (18.2)  | 182 (16.1)  | 84 (25.3)  |            |
| 6  | Family composition                                                        |             |             |            | 0.004**    |
| 7  | Two-parent family                                                         | 1386 (93.8) | 1084 (94.8) | 302 (90.4) |            |
| 8  | Single-parent family                                                      | 92 (6.2)    | 60 (5.2)    | 32 (9.6)   |            |
| 9  |                                                                           |             |             |            |            |
| 10 |                                                                           |             |             |            |            |
| 11 | <b>Need Factors</b>                                                       |             |             |            |            |
| 12 | BITSEA Problem scale score                                                |             |             |            | < 0.001*** |
| 13 | No risk                                                                   | 1400 (94.0) | 1101 (95.6) | 299 (88.5) |            |
| 14 | At risk                                                                   | 90 (6.0)    | 51 (4.4)    | 39 (11.5)  |            |
| 15 | BITSEA Competence scale score                                             |             |             |            | 0.011*     |
| 16 | No risk                                                                   | 1300 (88.0) | 1017 (89.1) | 283 (84.0) |            |
| 17 | At risk                                                                   | 178 (12.0)  | 124 (10.9)  | 54(16.0)   |            |
| 18 | Stressful life events                                                     |             |             |            | < 0.001*** |
| 19 | No                                                                        | 749 (51.0)  | 608 (53.5)  | 141 (42.3) |            |
| 20 | Yes                                                                       | 720 (49.0)  | 528 (46.5)  | 192 (57.7) |            |
| 21 | General health of the child <sup>a</sup>                                  |             |             |            | 0.007**    |
| 22 | Good                                                                      | 1370 (92.2) | 1070(93.2)  | 300 (88.8) |            |
| 23 | Poor                                                                      | 116 (7.8)   | 78 (6.8)    | 38 (11.2)  |            |
| 24 | Parental satisfaction of child's development <sup>b</sup>                 |             |             |            | <0.001***  |
| 25 | Yes                                                                       | 1380 (94.7) | 1074(95.9)  | 306 (90.5) |            |
| 26 | No                                                                        | 78 (5.3)    | 46(4.1)     | 32 (9.5)   |            |
| 27 | Previous help-seeking                                                     |             |             |            | <0.001***  |
| 28 | No                                                                        | 1208 (82.2) | 992 (87.1)  | 216 (65.5) |            |
| 29 | Yes                                                                       | 261 (17.8)  | 147 (12.9)  | 114 (34.5) |            |
| 30 | Discussion of child's socio-emotional development in the well-child visit |             |             |            | <0.001***  |
| 31 | No                                                                        | 1196 (85.6) | 980 (89.8)  | 216 (70.6) |            |
| 32 | Yes                                                                       | 201 (14.4)  | 111 (10.2)  | 90 (29.4)  |            |
| 33 |                                                                           |             |             |            |            |

Note: This table presents non-imputed data. The missing numbers of variables are child gender (n=10), child ethnic background (n=60), parental age (n=11), parental educational level (n=34), parental work status (n=46), family composition (n=29), BITSEA Problem scale score (n=17), BITSEA Competence scale score (n=29), stressful life events (n=38), general health of the child (n=21), parental satisfaction of child's development (n=49), previous help-seeking (n=38), and discussion of child socio-emotional development in the well-child visit (n=110).

a. General health of the child was measured by the 4-item subscale General Health of the Infant Toddler Quality of Life Questionnaire (47 items).

b. Parental satisfaction of child's development was measured by the 5-item subscale Satisfaction of Child's Development of the Infant Toddler Quality of Life Questionnaire (47 items).

Abbreviation: SD=standard deviation; BITSEA= Brief Infant-Toddler Social and Emotional Assessment.

\*  $p < 0.05$ ; \*\*  $p < 0.01$ ; \*\*\*  $p < 0.001$ .

### Factors associated with parental help-seeking

Table 2 presents the results of logistic regression analyses. Model 1 with predisposing factors as independent factors showed that having an other-western ethnic background (OR=1.73, 95%CI: 1.10-2.71) and non-western ethnic background as a child (OR=1.51, 95%CI: 1.05-2.18) as well as parental age  $\leq$  29 years old (OR=2.28, 95%CI: 1.38-3.77) were associated with parental help-seeking.

Model 2 shows the association between predisposing factors and enabling factors. Of predisposing factors, having an other-western ethnic background (OR=1.66, 95%CI: 1.05-2.60) and parental age  $\leq$  29 years old (OR=1.96, 95%CI: 1.17-3.27) were associated with parental help-seeking. Two enabling factors parental educational level (OR=1.36, 95%CI: 1.04-1.79) and parental employed status (OR=1.47, 95%CI: 1.07-2.02) were associated with parental help-seeking.

In the full model (model 3), two predisposing factors having an other-western ethnic background as a child (OR=1.66, 95%CI: 1.02-2.68) and parental age  $\leq$  29 years old (OR=1.71, 95%CI: 1.01-2.92) were associated with a higher odds for parental help-seeking. No associations were found between enabling factors and parental help-seeking. Of the need factors, previous help-seeking (OR=2.52, 95%CI: 1.83-3.48) and discussion of child socio-emotional development in the well-child visit (OR=2.47, 95%CI: 1.73-3.53) were associated with a higher odds for parental help-seeking for socio-emotional development at child age 3 years.

Table 2. Associations between predisposing, enabling, and need factors and parental help-seeking in the past 12 months for the 3-year-old child (n=1507)

|                                    | Multivariate           |           |                         |           |                     |           |
|------------------------------------|------------------------|-----------|-------------------------|-----------|---------------------|-----------|
|                                    | Model 1                |           | Model 2                 |           | Model 3             |           |
|                                    | Predisposing variables |           | Plus enabling variables |           | Plus need variables |           |
|                                    | OR                     | 95% CI    | OR                      | 95% CI    | OR                  | 95% CI    |
| <b><i>Predisposing Factors</i></b> |                        |           |                         |           |                     |           |
| Child gender                       |                        |           |                         |           |                     |           |
| Boys                               | Ref                    |           | Ref                     |           | Ref                 |           |
| Girls                              | 0.93                   | 0.73-1.19 | 0.93                    | 0.73-1.19 | 0.98                | 0.75-1.27 |
| Child ethnic background            |                        |           |                         |           |                     |           |
| Dutch                              | Ref                    |           | Ref                     |           | Ref                 |           |
| Other western                      | 1.73*                  | 1.10-2.71 | 1.66*                   | 1.05-2.60 | 1.66*               | 1.02-2.68 |
| Non-western                        | 1.51*                  | 1.05-2.18 | 1.20                    | 0.81-1.78 | 1.18                | 0.77-1.79 |
| Parental age in year               |                        |           |                         |           |                     |           |
| $\geq$ 40                          | Ref                    |           | Ref                     |           | Ref                 |           |
| 30-39                              | 1.56                   | 0.99-2.46 | 1.57                    | 1.00-2.46 | 1.45                | 0.90-2.32 |

|    |                                                                         |        |           |       |           |         |           |
|----|-------------------------------------------------------------------------|--------|-----------|-------|-----------|---------|-----------|
| 1  |                                                                         |        |           |       |           |         |           |
| 2  |                                                                         |        |           |       |           |         |           |
| 3  | =<29                                                                    | 2.28** | 1.38-3.77 | 1.96* | 1.17-3.27 | 1.71*   | 1.01-2.92 |
| 4  | <b>Enabling Factors</b>                                                 |        |           |       |           |         |           |
| 5  |                                                                         |        |           |       |           |         |           |
| 6  | Parental educational level                                              |        |           |       |           |         |           |
| 7  | High                                                                    |        |           | Ref   |           | Ref     |           |
| 8  | Middle                                                                  |        |           | 1.36* | 1.04-1.79 | 1.30    | 0.97-1.74 |
| 9  | Low                                                                     |        |           | 1.12  | 0.67-1.89 | 1.10    | 0.63-1.90 |
| 10 | Parental work status                                                    |        |           |       |           |         |           |
| 11 | Employed                                                                |        |           | Ref   |           | Ref     |           |
| 12 | Unemployed                                                              |        |           | 1.47* | 1.07-2.02 | 1.28    | 0.91-1.80 |
| 13 | Family composition                                                      |        |           |       |           |         |           |
| 14 | Two-parent family                                                       |        |           | Ref   |           | Ref     |           |
| 15 | Single-parent family                                                    |        |           | 1.51  | 0.95-2.41 | 1.31    | 0.80-2.15 |
| 16 | <b>Need Factors</b>                                                     |        |           |       |           |         |           |
| 17 | BITSEA Problem scale score                                              |        |           |       |           |         |           |
| 18 | No risk                                                                 |        |           |       |           | Ref     |           |
| 19 | At risk                                                                 |        |           |       |           | 1.20    | 0.72-1.99 |
| 20 | BITSEA Competence scale score                                           |        |           |       |           |         |           |
| 21 | No risk                                                                 |        |           |       |           | Ref     |           |
| 22 | At risk                                                                 |        |           |       |           | 1.18    | 0.78-1.79 |
| 23 | Stressful life events                                                   |        |           |       |           |         |           |
| 24 | No                                                                      |        |           |       |           | Ref     |           |
| 25 | Yes                                                                     |        |           |       |           | 1.29    | 0.98-1.68 |
| 26 | General health of the child <sup>a</sup>                                |        |           |       |           |         |           |
| 27 | Good                                                                    |        |           |       |           | Ref     |           |
| 28 | Poor                                                                    |        |           |       |           | 1.16    | 0.73-1.85 |
| 29 | Parental satisfaction of child's development <sup>a</sup>               |        |           |       |           |         |           |
| 30 | Yes                                                                     |        |           |       |           | Ref     |           |
| 31 | No                                                                      |        |           |       |           | 1.35    | 0.75-2.45 |
| 32 | Previous help-seeking                                                   |        |           |       |           |         |           |
| 33 | No                                                                      |        |           |       |           | Ref     |           |
| 34 | Yes                                                                     |        |           |       |           | 2.52*** | 1.83-3.48 |
| 35 | Discussion of child socio-emotional development in the well-child visit |        |           |       |           |         |           |
| 36 | No                                                                      |        |           |       |           | Ref     |           |
| 37 | Yes                                                                     |        |           |       |           | 2.47*** | 1.73-3.53 |

Model 1: The model with predisposing factors as independent variables.

Model 2: The model with predisposing and enabling factors as independent variables.

Model 3: The full model with predisposing, enabling, and need factors as independent variables.

1  
2  
3 a. General health of the child was measured by the 4-item subscale General Health of the Infant Toddler Quality of Life  
4 Questionnaire (47 items).

5 b. Parental satisfaction of child's development was measured by the 5-item subscale Satisfaction of Child's Development of  
6 the Infant Toddler Quality of Life Questionnaire (47 items).

7  
8 Abbreviation: OR=Odds Ratio; CI=Confidence Interval; BITSEA= Brief Infant-Toddler Social and Emotional Assessment.

9 \*  $p < 0.05$ ; \*\*  $p < 0.01$ ; \*\*\*  $p < 0.001$   
10  
11  
12  
13  
14  
15  
16  
17  
18  
19  
20  
21  
22  
23  
24  
25  
26  
27  
28  
29  
30  
31  
32  
33  
34  
35  
36  
37  
38  
39  
40  
41  
42  
43  
44  
45  
46  
47  
48  
49  
50  
51  
52  
53  
54  
55  
56  
57  
58  
59  
60

For peer review only



## Use of formal and informal help sources

Table 3 shows the frequency of formal and informal help sources used in parental help-seeking for their 3-year-old child's socio-emotional development in the past 12 months. Among the 341 parents who reported help-seeking, fewer parents (30.2%) reported the use of formal help sources than parents (77.4%) who reported the use of informal help sources ( $p < 0.001$ , Supplementary Table S3). Only 26 (7.6%) parents used both formal and informal help sources. The GP (12.0%) and parenting support services, such as parenting courses (9.4%), were the most frequently used formal help source. Family (55.4%) and friends/acquaintance/neighbor (40.5%) were the most frequently used informal help sources. Characteristics of the study population by use of formal and informal sources in parental help-seeking are presented in Supplementary Table S4.

Table 3. Use of formal and informal help sources in parental help-seeking in the past 12 months for the 3-year-old child (n=1507)

|                                                   | n          | Total sample (%)<br>(n=1507) | Help-seeking (Yes) (%)<br>(n=341) |
|---------------------------------------------------|------------|------------------------------|-----------------------------------|
| <b>Parents reported use of help sources (yes)</b> | 341        | 22.6                         | 100.0                             |
| Formal and informal help sources                  | 26         | 1.7                          | 7.6                               |
| Formal help source(s) only                        | 77         | 5.1                          | 22.6                              |
| Informal help source(s) only                      | 238        | 15.8                         | 69.8                              |
| <b>Type of help sources</b>                       |            |                              |                                   |
| Formal Sources (yes)                              | <u>103</u> | <u>6.8</u>                   | <u>30.2</u>                       |
| General practitioner                              | 41         | 2.7                          | 12.0                              |
| Parenting support service                         | 32         | 2.1                          | 9.4                               |
| Specialized medical care                          | 20         | 1.3                          | 5.9                               |
| Youth protection services                         | 18         | 1.2                          | 5.3                               |
| Mental health care professionals                  | 11         | 0.7                          | 3.2                               |
| Social worker                                     | 1          | 0.1                          | 0.3                               |
| Informal Sources (yes)                            | <u>264</u> | <u>17.5</u>                  | <u>77.4</u>                       |
| Family                                            | 189        | 12.5                         | 55.4                              |
| Friend/acquaintance/neighbor                      | 138        | 9.2                          | 40.5                              |
| Internet                                          | 71         | 4.7                          | 20.8                              |
| Daycare center/school                             | 12         | 0.8                          | 3.5                               |
| Complementary medicine                            | 4          | 0.3                          | 1.2                               |
| Emergency telephone service                       | 3          | 0.2                          | 0.9                               |
| Book/magazine                                     | 2          | 0.1                          | 0.6                               |
| Prayer house                                      | 1          | 0.1                          | 0.3                               |

Note. Parents could endorse more than one option; hence, the sum of each subcategory does not total up to 100%.

### Additional data analyses

Supplementary Table S5 shows the results of multivariate logistic regression conducted with complete data. There was a difference between the full models of multivariate logistic regression conducted with non-imputed data and those with imputed data. In the imputed data analysis, parents of a child with other-western ethnic background (OR=1.66, 95%CI: 1.02-2.68) in the predisposing block were more likely to have help-seeking. This association was not significant (OR=1.51, 95%CI: 0.87-2.63) in the analysis conducted with complete data. On the other hand, stressful life events (OR=1.45, 95%CI: 1.07-1.96) in the need block were associated with help-seeking in the complete data analysis but not in the imputed data analysis (OR=1.29, 95%CI: 0.98-1.68). Although the significance in two factors changed, the pattern of relevant factors was similar. The rest of the factors in three blocks kept the same association and significance in the imputed data analysis and the complete data analysis, thereby indicating the robustness of the model. Furthermore, we conducted the Chi-square test of homogeneity, which showed that there were no significant differences (all p-values >0.05) between the characteristics of the imputed data and the complete data (Supplementary Table S6).

## Discussion

In the present study, factors associated with parental help-seeking for the socio-emotional development of 3-year-old children were studied. Among predisposing factors, having an other-western ethnic background as a child and parental age younger than 29 years old indicated a higher odds of parental help-seeking for the socio-emotional development of children aged 3 years. Also, previous help-seeking and discussing the child's socio-emotional development in the well-child visit as need factors were associated with a higher odds for parental help-seeking. No association was found between enabling factors and parental help-seeking.

The findings of predisposing factors indicated parents of child with other-western background were more like to seek help, compared with parents of Dutch children. Existing studies on the association between minority ethnic background and help-seeking for children's socio-emotional development have showed conflicting results.<sup>26, 36, 49, 50</sup> These differing results may be due to the different characteristics of minor ethnic backgrounds as well as differing help-seeking measures among the studies.<sup>19, 36</sup> Although parents of children from minority ethnic background perceived more barriers to access formal help-seeking, studies report these parents are able to access informal help sources as easily and as equally to native parents<sup>32, 51-53</sup> Moreover, the health care framework in the Netherlands (e.g. equal primary care, collaboration of professionals in the community, universal health care), and social contexture (e.g. language and cultural similarity) may partly reduce barriers to health care among the parents with other western background.<sup>19, 54-58</sup>

Besides the child's other-western background, as a predisposing factor, parental age was also associated with help-seeking: younger parents were more likely to seek help for their 3-year-old child. Previous studies have reported first-time parents to be more open and actively involved in searching for information about parenting and child development.<sup>59</sup> First-time parents are also more likely to reach out for help.<sup>60</sup> In the current study, we were unable to adapt for the parity of the child; therefore, we were not able to evaluate whether this explanation might hold for our findings.

With regard to enabling factors without correction for the need factors, parental educational level and employment status were associated with help-seeking. After correction for the need factors, parental educational level, employment status and family composition were not significantly associated. Studies on association between three enabling factors and help-seeking have reported contrary results. In the Netherlands, equal access to primary care (e.g. GPs and YHC), to comprehensive care professionals in clinics and communities, and to universal health care may reduce the barriers for parents in the enabling domain.<sup>55, 56</sup> Similar results have been found in other studies conducted in a similar context.<sup>53, 61, 62</sup>

1  
2  
3 With regard to need factors, we observed that parents seeking any help for their child's socio-emotional  
4 development before the age of 2 years were more likely to seek help in the past 12 months at child age  
5 3 years. It is plausible that parents who had previous help-seeking may be able to deal better with barriers  
6 (e.g. parents' self-stigma) and with exploring more sources in terms of help-seeking.<sup>36</sup> In addition, the  
7 literature regarding the use of mental health service for children and adolescents suggests that social  
8 and emotional problems exist over a longer period of time.<sup>27, 63</sup> Therefore, it is suggested that for actual  
9 problem behavior longitudinal care is needed.<sup>11, 22, 64</sup> Consequently, findings underline the importance of  
10 YHC in monitoring advice for children's socio-emotional development.  
11  
12

13  
14  
15  
16 Furthermore, parents who had previously discussed their child's socio-emotional development in the well-  
17 child visit at the child age of 2 years, were more likely to seek help in the past 12 months. In the  
18 Netherlands, the discussion during the well-child visit could be raised by parents or YHC professionals.  
19 The YHC professionals can suggest a discussion based on the evaluation of the child's socio-emotional  
20 development. Parents also can consult on this issue if they are concerned about their child's socio-  
21 emotional development. In this capacity, the YHC professional assists the parent to recognize early  
22 childhood psychosocial problems. Although recognition of problem behavior by parents has been  
23 reported to be difficult for parents, it is important for them to be able to seek help in time.<sup>5, 17, 20, 25, 26</sup> The  
24 YHC thus plays a crucial role in screening and identifying children's social and emotional problems in the  
25 Netherlands.<sup>65</sup>  
26  
27  
28  
29  
30  
31

32  
33 Consistent with previous studies in school-aged children, our results showed that formal help sources  
34 were used less frequently than informal help sources for children's socio-emotional development.<sup>21, 31</sup>  
35 Gaining access to formal help sources may have more barriers, such as iterative referral processes, long  
36 waiting times and high costs.<sup>32, 51, 66</sup> The informal help sources most often used in this study were the  
37 parental social network as well as information from books and the internet.<sup>52, 67</sup> Accordingly, compared  
38 with formal help sources, informal help sources might be more directly available and accessible for  
39 parents when they are seeking help for their children's socio-emotional development.<sup>24, 66</sup>  
40  
41  
42  
43  
44

45 The present study has several strengths. First, the longitudinal association between predisposing,  
46 enabling, and need factors and parental help-seeking was studied among a large population-based  
47 sample of parents of 3-year-old children. Parental help-seeking for children under 4 years old is rarely  
48 studied.<sup>19, 21, 31</sup> Second, formal and informal help sources in parental help-seeking were included.  
49 Specifically, a broad range of informal help sources, e.g., internet, books, complementary medicine and  
50 religious institutes were assessed. Nevertheless, there were some limitations that need to be addressed.  
51 First, the social and emotional problems were those that parents perceived and were generally evaluated,  
52 whereas specific conditions with diagnoses, such as anxiety and depression diagnosed by RCADS, could  
53  
54  
55  
56  
57  
58  
59  
60

1  
2  
3 have provided more precise information. Our study focusses on at-risk behavior and provides insight into  
4 more timely detection of problem behavior. Second, parental help-seeking is self-reported and recall bias  
5 is possible; however, the a one-year recall might have decreased recall inaccuracy.<sup>68</sup> Third, the  
6 multivariate regression analyses showed a slight difference between results conducted with the complete  
7 data and those with the imputed data. Therefore, we assessed the homogeneity of the above two  
8 datasets (Supplementary Table S6), and found no significant difference in the characteristics of the two  
9 populations ( $p>0.05$ ). Fourth, these results must be considered within the context of their limitations. The  
10 population based sample was drawn from a city where university and public service employees are  
11 overrepresented. Consequently, generalization of the findings to national samples may be limited. Finally,  
12 a lack of repeated measurements did not allow us to establish the causal association in the current study.  
13  
14  
15  
16  
17  
18  
19  
20  
21

## 22 **Conclusion**

23 The associations between predisposing, enabling, and needs factors and help-seeking by parents of  
24 preschool children with regard to their child's socio-emotional development were evaluated. The factors  
25 'non-western ethnic background', younger age of the parent, previous help-seeking and specific  
26 discussions about the child's socio-emotional development during the well-child visit were associated  
27 with the presence of parental help-seeking. Parents reported using informal help sources more often than  
28 formal help sources. The findings can be used to further develop support for parents to access adequate  
29 information, prevention, and anticipatory care with regard to their child's socio-emotional development.  
30  
31  
32  
33  
34  
35  
36  
37  
38  
39  
40  
41  
42  
43  
44  
45  
46  
47  
48  
49  
50  
51  
52  
53  
54  
55  
56  
57  
58  
59  
60

## Footnotes

**Funding:** This work was supported by ZonMw, grant number 729301001. Jie Luo was funded by the Chinese Government Scholarship (CN), grant number 201806170061.

**Competing interests:** Non-financial associations that may be relevant to the submitted manuscript.

**Ethics approval:** The Medical Ethical Committee of the Erasmus Medical Center Rotterdam declared that the Medical Research Involving Human Subject Act (Dutch abbreviation WMO) did not apply to the present study and, subsequently, permission was given to carry out the study and to publish the results in scientific journals (number MEC-2014-152). This study was conducted by following the guidelines proposed in the World Medical Association Declaration of Helsinki.

**Contributors:** HR obtained the funding. HR, AG, and RB managed the research and undertook data collection. CBF, JL, AG, and HR conceived the research described in this paper. JL analyzed the data. All authors provided input in interpreting the data. JL drafted the manuscript with input of AG, CBF, HR and GB. All authors critically reviewed and approved the manuscript.

**Word Count:** 3981 words (excluding the title page, abstract, tables, footnotes and references)

## References

1. Egger HL, Angold A. Common emotional and behavioral disorders in preschool children: Presentation, nosology, and epidemiology. *J Child Psychol Psychiatry*. 2006;**47**:313-37. <https://doi.org/10.1111/j.1469-7610.2006.01618.x>
2. Kieling C, Baker-Henningham H, Belfer M, *et al*. Child and adolescent mental health worldwide: Evidence for action. *Lancet*. 2011;**378**:1515-25. [https://doi.org/10.1016/s0140-6736\(11\)60827-1](https://doi.org/10.1016/s0140-6736(11)60827-1)
3. Klitzing Kv, Döhnert M, Kroll M, *et al*. Mental disorders in early childhood. *Dtsch Arztebl International*. 2015;**112**:375-86. <https://doi.org/10.3238/arztebl.2015.03754496484>
4. Kariuki SM, Abubakar A, Kombe M, *et al*. Burden, risk factors, and comorbidities of behavioural and emotional problems in kenyan children: A population-based study. *Lancet Psychiatry*. 2017;**4**:136-45. [https://doi.org/10.1016/s2215-0366\(16\)30403-5PMC5285446](https://doi.org/10.1016/s2215-0366(16)30403-5PMC5285446)
5. Vitrikas K, Savard D, Bucaj M. Developmental delay: When and how to screen. *Am Fam Physician*. 2017;**96**:36-43
6. Wichstrøm L, Berg-Nielsen TS, Angold A, *et al*. Prevalence of psychiatric disorders in preschoolers. *J Child Psychol Psychiatry*. 2012;**53**:695-705. <https://doi.org/10.1111/j.1469-7610.2011.02514.x>
7. Skovgaard AM. Mental health problems and psychopathology in infancy and early childhood. *Dan Med Bull*. 2010;**57**:B4193
8. Anselmi L, Piccinini CA, Barros FC, *et al*. Psychosocial determinants of behaviour problems in brazilian preschool children. *Journal of Child Psychology and Psychiatry*. 2004;**45**:779-88. <https://doi.org/10.1111/j.1469-7610.2004.00271.x>
9. Hemmi MH, Wolke D, Schneider S. Associations between problems with crying, sleeping and/or feeding in infancy and long-term behavioural outcomes in childhood: A meta-analysis. *Arch Dis Child*. 2011;**96**:622. <https://doi.org/10.1136/adc.2010.191312>
10. Holtmann M, Buchmann AF, Esser G, *et al*. The child behavior checklist-dysregulation profile predicts substance use, suicidality, and functional impairment: A longitudinal analysis. *J Child Psychol Psychiatry*. 2011;**52**:139-47. <https://doi.org/10.1111/j.1469-7610.2010.02309.x>
11. O'Connor C, Reulbach U, Gavin B, *et al*. A prospective longitudinal investigation of the (dis)continuity of mental health difficulties between mid- to late-childhood and the predictive role of familial factors. *Eur Child Adolesc Psychiatry*. 2018;**27**:289-300. <https://doi.org/10.1007/s00787-017-1044-5>
12. de Ross RL, Gullone E, Chorpita BF. The revised child anxiety and depression scale: A psychometric. *Behav Change*. 2002;**19**:2. <https://doi.org/10.1007/s10862-021-09879-y>
13. Malik F, Marwaha R. Developmental stages of social emotional development in children. Statpearls. Treasure Island (FL): StatPearls; 2018.
14. Letcher P, Smart D, Sanson A, *et al*. Psychosocial precursors and correlates of differing internalizing trajectories from 3 to 15 years 1. *Social Development*. 2009;**18**:618-46
15. Shaw DS, Lacourse E, Nagin DS. Developmental trajectories of conduct problems and hyperactivity from ages 2 to 10. *Journal of Child Psychology and Psychiatry*. 2005;**46**:931-42. <https://doi.org/10.1111/j.1469-7610.2004.00390.x>
16. Patel V, Kieling C, Maulik PK, *et al*. Improving access to care for children with mental disorders: A global perspective. *Arch Dis Child*. 2013;**98**:323-7. <https://doi.org/10.1136/archdischild-2012-3020793672840>
17. Johnston OG, Burke JD. Parental problem recognition and help-seeking for disruptive behavior disorders. *J Behav Health Serv Res*. 2020;**47**:146-63. <https://doi.org/10.1007/s11414-018-09648-y>
18. Thompson RA. Emotional regulation and emotional development. *Educ Psychol Rev*. 1991;**3**:269-307. <https://doi.org/10.1007/BF01319934>
19. Zwaanswijk M, van der Ende J, Verhaak PF, *et al*. Help-seeking for child psychopathology: Pathways to informal and professional services in the netherlands. *J Am Acad Child Adolesc Psychiatry*. 2005;**44**:1292-300. <https://doi.org/10.1097/01.chi.0000181038.98712.c6>

20. Oh E, Bayer JK. Parents' help-seeking processes for early childhood mental health problems. *Child and Adolescent Mental Health*. 2015;**20**:149-54. <https://doi.org/10.1111/camh.12081>
21. Girio-Herrera E, Owens JS, Langberg JM. Perceived barriers to help-seeking among parents of at-risk kindergarteners in rural communities. *J Clin Child Adolesc Psychol*. 2013;**42**:68-77. <https://doi.org/10.1080/15374416.2012.715365>
22. Beyer T, Postert C, Müller JM, et al. Prognosis and continuity of child mental health problems from preschool to primary school: Results of a four-year longitudinal study. *Child Psychiatry Hum Dev*. 2012;**43**:533-43. <https://doi.org/10.1007/s10578-012-0282-5>
23. Andersen RM. Revisiting the behavioral model and access to medical care: Does it matter? *J Health Soc Behav*. 1995;1-10. <https://doi.org/10.2307/2137284>
24. Murry VM, Heflinger CA, Suiter SV, et al. Examining perceptions about mental health care and help-seeking among rural african american families of adolescents. *J Youth Adolesc*. 2011;**40**:1118-31. <https://doi.org/10.1007/s10964-010-9627-1>
25. Thurston IB, Hardin R, Decker K, et al. Black and white parents' willingness to seek help for children's internalizing and externalizing symptoms. *J Clin Psychol*. 2017;**74**:161-77. <https://doi.org/10.1002/jclp.22495>
26. Bussing R, Zima BT, Gary FA, et al. Barriers to detection, help-seeking, and service use for children with adhd symptoms. *The Journal of Behavioral Health Services & Research*. 2003;**30**:176-89. <https://doi.org/10.1007/BF02289806>
27. Zwaanswijk M, Verhaak PF, Bensing JM, et al. Help seeking for emotional and behavioural problems in children and adolescents: A review of recent literature. *Eur Child Adolesc Psychiatry*. 2003;**12**:153-61. <https://doi.org/10.1007/s00787-003-0322-6>
28. Sayal KJJoCP, Psychiatry. Annotation: Pathways to care for children with mental health problems. *J Child Psychol Psychiatry*. 2006;**47**:649-59. <https://doi.org/10.1111/j.1469-7610.2005.01543.x>
29. Morawska A, Sultan A. Parental attitudes towards seeking professional help for their children: A community sample from the sultanate of oman. *Journal of Child and Family Studies*. 2016;**25**:979-87. <https://doi.org/10.1007/s10826-015-0257-9>
30. Alonso J, Little E. Parent help-seeking behaviour: Examining the impact of parent beliefs on professional help-seeking for child emotional and behavioural difficulties. *The Educational and Developmental Psychologist*. 2019;**36**:60-7. <https://doi.org/10.1017/edp.2019.8>
31. Reardon T, Harvey K, Creswell C. Seeking and accessing professional support for child anxiety in a community sample. *Eur Child Adolesc Psychiatry*. 2019;**29**:649-64. <https://doi.org/10.1007/s00787-019-01388-47250799>
32. Iskra W, Deane FP, Wahlin T, et al. Parental perceptions of barriers to mental health services for young people. *Early Interv Psychiatry*. 2015;**12**:125-34. <https://doi.org/10.1111/eip.12281>
33. Ryan SM, Jorm AF, Toumbourou JW, et al. Parent and family factors associated with service use by young people with mental health problems: A systematic review. *Early Interv Psychiatry*. 2015;**9**:433-46. <https://doi.org/10.1111/eip.12211>
34. Dempster R, Davis DW, Jones VF, et al. The role of stigma in parental help-seeking for perceived child behavior problems in urban, low-income african american parents. *J Clin Psychol Med Settings*. 2015;**22**:265-78. <https://doi.org/10.1007/s10880-015-9433-8>
35. Sayal K, Mills J, White K, et al. Predictors of and barriers to service use for children at risk of adhd: Longitudinal study. *Eur Child Adolesc Psychiatry*. 2015;**24**:545-52. <https://doi.org/10.1007/s00787-014-0606-z>
36. Reardon T, Harvey K, Baranowska M, et al. What do parents perceive are the barriers and facilitators to accessing psychological treatment for mental health problems in children and adolescents? A systematic review of qualitative and quantitative studies. *Eur Child Adolesc Psychiatry*. 2017;**26**:623-47. <https://doi.org/10.1007/s00787-016-0930-6PMC5446558>



- 1
- 2
- 3
- 4 37. A.E.M. de Hollander NH, J.M. Melse, J.A.M van Oers,. Care for health: The 2006 dutch public
- 5 health status and forecasts report. Bilthoven, The Netherlands: The National Institute for Public Health
- 6 and the Environment; 2007.
- 7 38. Oudhof M, MS de Wolff, M. de Ruiter, M. Kamphuis, MP L'Hoir and and B. Prinsen. Jgz richtlijn
- 8 opvoedingsondersteuning voor hulp bij opvoedingsvragen en lichte opvoedproblemen. Utrecht, the
- 9 Netherlands: Nederland Centrum Jeugdgezondheid (NCJ); 2013.
- 10 39. Annual report on integration 2018. The Hague, the Netherlands: Statistics Netherlands; 2018.
- 11 40. Standaard onderwijsindeling 2016. Den Haag, the Netherlands: Statistics Netherlands, 2018.
- 12 41. Briggs-Gowan MJ, Carter AS. Social-emotional screening status in early childhood predicts
- 13 elementary school outcomes. *Pediatrics*. 2008;**121**:957-62.[https://doi.org/10.1542/peds.2007-](https://doi.org/10.1542/peds.2007-19483088107)
- 14 [19483088107](https://doi.org/10.1542/peds.2007-19483088107)
- 15 42. Kruizinga I, Jansen W, De Haan CL, *et al*. Reliability and validity of the dutch version of the
- 16 bitsea. *PLoS One*. 2012;**7**:e38762.<https://doi.org/10.1371/journal.pone.00387623371000>
- 17 43. Briggs-Gowan MJ, Carter AS, Irwin JR, *et al*. The brief infant-toddler social and emotional
- 18 assessment: Screening for social-emotional problems and delays in competence. *J Pediatr Psychol*.
- 19 2004;**29**:143-55.<https://doi.org/10.1093/jpepsy/jsh017>
- 20 44. Landgraf JM, Vogel I, Oostenbrink R, *et al*. Parent-reported health outcomes in infants/toddlers:
- 21 Measurement properties and clinical validity of the itqol-sf47. *Qual Life Res*. 2013;**22**:635-
- 22 46.<https://doi.org/10.1007/s11136-012-0177-8>
- 23 45. Raat H, Landgraf JM, Oostenbrink R, *et al*. Reliability and validity of the infant and toddler
- 24 quality of life questionnaire (itqol) in a general population and respiratory disease sample. *Qual Life*
- 25 *Res*. 2007;**16**:445-60.<https://doi.org/10.1007/s11136-006-9134-82792359>
- 26 46. Liu Y, De A. Multiple imputation by fully conditional specification for dealing with missing data in
- 27 a large epidemiologic study. *International journal of statistics in medical research*.
- 28 2015;**4**:287.<https://doi.org/10.6000/1929-6029.2015.04.03.74945131>
- 29 47. Zhou X-H, Eckert GJ, Tierney WM. Multiple imputation in public health research. *Stat Med*.
- 30 2001;**20**:1541-9.<https://doi.org/10.1002/sim.689>
- 31 48. Greenland S. Multiple - bias modelling for analysis of observational data. *Journal of the Royal*
- 32 *Statistical Society: Series A (Statistics in Society)*. 2005;**168**:267-306
- 33 49. Alegria M, Canino G, Lai S, *et al*. Understanding caregivers' help-seeking for latino children's
- 34 mental health care use. *Med Care*. 2004;**42**:447-
- 35 55.<https://doi.org/10.1097/01.mlr.0000124248.64190.56>
- 36 50. Verhulp EE, Stevens GWJM, van de Schoot R, *et al*. Understanding ethnic differences in mental
- 37 health service use for adolescents' internalizing problems: The role of emotional problem identification.
- 38 *Eur Child Adolesc Psychiatry*. 2013;**22**:413-21.<https://doi.org/10.1007/s00787-013-0380-3>
- 39 51. Shanley DC, Reid GJ, Evans B. How parents seek help for children with mental health
- 40 problems. *Administration and Policy in Mental Health and Mental Health Services Research*.
- 41 2008;**35**:135-46.<https://doi.org/10.1007/s10488-006-0107-6>
- 42 52. Giallo R, Dunning M, Gent A. Attitudinal barriers to help-seeking and preferences for mental
- 43 health support among australian fathers. *J Reprod Infant Psychol*. 2017;**35**:236-
- 44 47.<https://doi.org/10.1080/02646838.2017.1298084>
- 45 53. Zimmerman FJ. Social and economic determinants of disparities in professional help - seeking
- 46 for child mental health problems: Evidence from a national sample. *Health Serv Res*. 2005;**40**:1514-
- 47 33.<https://doi.org/10.1111/j.1475-6773.2005.00411.x1361199>
- 48 54. Verbrugge HPJP. Youth health care in the netherlands: A bird's eye view. 1990;**86**:1044-7
- 49 55. van Weel C, Schers H, Timmermans A. Health care in the netherlands. *The Journal of the*
- 50 *American Board of Family Medicine*. 2012;**25**:S12-S7.<https://doi.org/10.3122/jabfm.2012.02.110212>
- 51 56. Kroneman M, Boerma W, van den Berg M, *et al*. The netherlands: Health system review. *Health*
- 52 *Syst Transit*. 2016;**18**:1-240
- 53
- 54
- 55
- 56
- 57
- 58
- 59
- 60

- 1  
2  
3 57. Lindert J, Schouler-Ocak M, Heinz A, *et al*. Mental health, health care utilisation of migrants in  
4 europe. *Eur Psychiatry*. 2008;**23**:14-20.[https://doi.org/10.1016/S0924-9338\(08\)70057-9](https://doi.org/10.1016/S0924-9338(08)70057-9)  
5 58. Karim N, Boyle B, Lohan M, *et al*. Immigrant parents' experiences of accessing child healthcare  
6 services in a host country: A qualitative thematic synthesis. *J Adv Nurs*.  
7 2020.<https://doi.org/10.1111/jan.14358>  
8 59. Goldfeld SR, Wright M, Oberklaid F. Parents, infants and health care: Utilization of health  
9 services in the first 12 months of life. *J Paediatr Child Health*. 2003;**39**:249-  
10 53.<https://doi.org/10.1046/j.1440-1754.2003.00146.x>  
11 60. Hanna BA, Edgecombe G, Jackson CA, *et al*. The importance of first-time parent groups for  
12 new parents. *Nurs Health Sci*. 2002;**4**:209-14.<https://doi.org/10.1046/j.1442-2018.2002.00128.x>  
13 61. Zahner GE, Daskalakis C. Factors associated with mental health, general health, and school-  
14 based service use for child psychopathology. *Am J Public Health*. 1997;**87**:1440-  
15 8.<https://doi.org/10.2105/ajph.87.9.1440>  
16 62. Sawyer MG, Miller-Lewis LR, Clark JJ. The mental health of 13–17 year-olds in australia:  
17 Findings from the national survey of mental health and well-being. *J Youth Adolesc*. 2007;**36**:185-  
18 94.<https://doi.org/10.1007/s10964-006-9122-x>  
19 63. Turner EA, Mohan S. Child mental health services and psychotherapy attitudes among asian  
20 indian parents: An exploratory study. *Community Ment Health J*. 2016;**52**:989-  
21 97.<https://doi.org/10.1007/s10597-015-9976-z>  
22 64. Costello EJ, Mustillo S, Erkanli A, *et al*. Prevalence and development of psychiatric disorders in  
23 childhood and adolescence. *Arch Gen Psychiatry*. 2003;**60**:837-  
24 44.<https://doi.org/10.1001/archpsyc.60.8.837>  
25 65. Alexander KE, Brijnath B, Mazza D. 'Can they really identify mental health problems at the age  
26 of three?' parent and practitioner views about screening young children's social and emotional  
27 development. *Aust N Z J Psychiatry*. 2013;**47**:538-45.<https://doi.org/10.1177/0004867413476756>  
28 66. Raviv A, Sharvit K, Raviv A, *et al*. Mothers' and fathers' reluctance to seek psychological help  
29 for their children. *Journal of Child and Family Studies*. 2009;**18**:151.<https://doi.org/10.1007/s10826-008-9215-0>  
30 67. Mitchell RE, Trickett EJ. Task force report: Social networks as mediators of social support.  
31 *Community Ment Health J*. 1980;**16**:27-44.<https://doi.org/10.1007/BF00780665>  
32 68. Coughlin SS. Recall bias in epidemiologic studies. *J Clin Epidemiol*. 1990;**43**:87-  
33 91.[https://doi.org/10.1016/0895-4356\(90\)90060-3](https://doi.org/10.1016/0895-4356(90)90060-3)  
34  
35  
36  
37  
38  
39  
40  
41  
42  
43  
44  
45  
46  
47  
48  
49  
50  
51  
52  
53  
54  
55  
56  
57  
58  
59  
60

1  
2  
3 **Figure**  
4  
5  
6

7 **Title:** Which factors are associated with help-seeking by parents regarding the socio-emotional  
8 development of their 3-year-old children: a longitudinal study.  
9

10  
11 **Journal:** BMJ Open  
12

13  
14 **Authors:** Jie Luo, Hein Raat, Carmen B. Franse, Rienke Bannink, Guannan Bai, Amy van  
15 Grieken  
16

17  
18 **Corresponding Author:** Amy van Grieken, PhD, Department of Public Health, Erasmus  
19 University Medical Center, P.O. Box 2040, 3000 CA Rotterdam, The Netherlands,  
20 a.vangrieken@erasmusmc.nl.  
21  
22  
23  
24  
25  
26  
27  
28  
29  
30  
31  
32  
33  
34  
35  
36  
37  
38  
39  
40  
41  
42  
43  
44  
45  
46  
47  
48  
49  
50  
51  
52  
53  
54  
55  
56  
57  
58  
59  
60

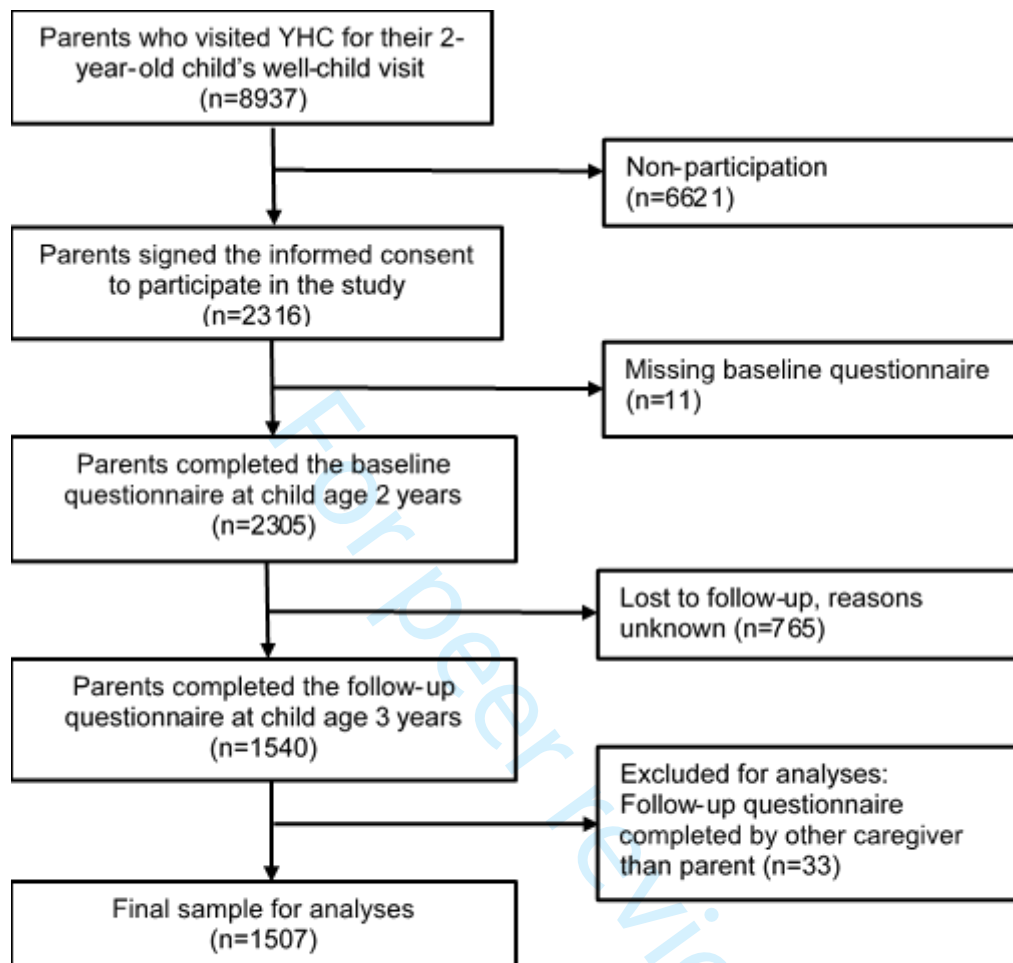

Figure 1. Population of Analysis

1  
2  
3  
4 **Supplementary Materials**  
5  
6  
7

8 **Title:** Which factors are associated with help-seeking by parents regarding the socio-emotional  
9 development of their 3-year-old children: a longitudinal study.  
10  
11

12  
13 **Journal:** BMJ Open  
14

15  
16 **Authors:** Jie Luo, Hein Raat, Carmen B. Franse, Rienke Bannink, Guannan Bai, Amy van Grieken  
17

18 **Corresponding Author:** Amy van Grieken, PhD, Department of Public Health, Erasmus University  
19 Medical Center, P.O. Box 2040, 3000 CA Rotterdam, The Netherlands, a.vangrieken@erasmusmc.nl.  
20  
21  
22  
23  
24  
25  
26  
27  
28  
29  
30  
31  
32  
33  
34  
35  
36  
37  
38  
39  
40  
41  
42  
43  
44  
45  
46  
47  
48  
49  
50  
51  
52  
53  
54  
55  
56  
57  
58  
59  
60

Supplementary Table S1. *P*-values for interactions between the 13 factors and child gender, child ethnic background, parental age and parental education level on help-seeking (n=1507)

|                                                                          | Child gender   | Child ethnic background | Parental age   | Parental education level |
|--------------------------------------------------------------------------|----------------|-------------------------|----------------|--------------------------|
|                                                                          | <i>p</i> value | <i>p</i> value          | <i>p</i> value | <i>p</i> value           |
| Child gender                                                             | -              | 0.877                   | 0.537          | 0.751                    |
| Child ethnic background                                                  | 0.877          | -                       | 0.049          | 0.981                    |
| Parental age                                                             | 0.537          | 0.049                   | -              | 0.829                    |
| Parental education level                                                 | 0.751          | 0.981                   | 0.829          | -                        |
| Parental work status                                                     | 0.325          | 0.909                   | 0.841          | 0.069                    |
| Family composition                                                       | 0.226          | 0.078                   | 0.887          | 0.194                    |
| BITSEA Problem scale score                                               | 0.419          | 0.373                   | 0.074          | 0.969                    |
| BITSEA Competence scale score                                            | 0.414          | 0.853                   | 0.406          | 0.100                    |
| Stressful life events                                                    | 0.003          | 0.518                   | 0.786          | 0.033                    |
| General health of the child                                              | 0.893          | 0.171                   | 0.442          | 0.271                    |
| Parental satisfaction of child's development                             | 0.446          | 0.307                   | 0.350          | 0.347                    |
| Previous help-seeking behavior                                           | 0.274          | 0.619                   | 0.159          | 0.567                    |
| Discussion of child social-emotional development in the well-child visit | 0.552          | 0.193                   | 0.126          | 0.731                    |

Note: numbers in table are *p*-values of interaction of the variables in rows and columns.

Abbreviations: BITSEA= Brief Infant–Toddler Social and Emotional Assessment.

Multivariate logistic regression was adopted for interaction analyses in the full model with predisposing variables, enabling variables and need variables as independent variables. After applying Bonferroni correction for multiple testing ( $P=0.05/42=0.001$ ), no statistically significant interaction was found.

Supplementary Table S2. Non-response analyses (n = 2305)

|                          | Total<br>(n=2305)<br>Mean ± SD N(%) | Response to follow-up              |                                      | p value |
|--------------------------|-------------------------------------|------------------------------------|--------------------------------------|---------|
|                          |                                     | No<br>(n=765)<br>Mean ± SD<br>N(%) | Yes<br>(n=1540)<br>Mean ± SD<br>N(%) |         |
| Child age in months      | 24.6±1.8                            | 24.8±1.6                           | 24.5±1.8                             | <0.001  |
| Child gender             |                                     |                                    |                                      | 0.155   |
| Boy                      | 1159 (50.6)                         | 401 (52.7)                         | 758 (49.5)                           |         |
| Girl                     | 1132 (49.4)                         | 360 (47.3)                         | 772 (50.5)                           |         |
| Child ethnic background  |                                     |                                    |                                      | <0.001  |
| Dutch                    | 1576 (73.3)                         | 415 (58.9)                         | 1161 (80.2)                          |         |
| Other western            | 166 (7.7)                           | 59 (8.4)                           | 107 (7.4)                            |         |
| Non-western              | 409 (19.0)                          | 230 (32.7)                         | 179 (12.4)                           |         |
| Parental age in year     |                                     |                                    |                                      | <0.001  |
| >=40                     | 262 (22.6)                          | 89 (11.8)                          | 173 (11.3)                           |         |
| 30-39                    | 1500 (65.9)                         | 438 (58.2)                         | 1062 (69.6)                          |         |
| =<29                     | 515 (11.5)                          | 225 (29.9)                         | 290 (19.0)                           |         |
| Parental education level |                                     |                                    |                                      | <0.001  |
| High                     | 1175 (52.8)                         | 282 (39.1)                         | 893 (59.5)                           |         |
| Middle                   | 858 (38.6)                          | 345 (47.8)                         | 513 (34.2)                           |         |
| Low                      | 191 (8.6)                           | 95 (13.2)                          | 96 (6.4)                             |         |

Note: This table present non-imputed data. The missing numbers of variables are child age (n=32), child gender (n=16), child ethnic background (n=165), parental age (n=39), parental educational level (n=92).

Abbreviation: SD=standard deviation.

P values are based on Independent t-test and chi-square test for non-response to follow-up and response groups.

Supplementary Table S3. McNemar's test for homogeneity of formal sources use and informal sources use (n=1507)

|                           | Informal sources use |      |       | p value |
|---------------------------|----------------------|------|-------|---------|
|                           | Yes                  | No   | Total |         |
| <b>Formal sources use</b> |                      |      |       |         |
| Yes                       | 26                   | 77   | 1404  | <0.001  |
| No                        | 238                  | 1166 | 103   |         |
| Total                     | 264                  | 1243 | 1507  |         |

P value is based on the McNemar's test.

Supplementary Table S4. Characteristics of the study population by use of formal and informal sources in parental help-seeking (n=1507)

|                               | Total<br>(n=1507)<br>Mean ± SD<br>N(%) | Use of formal sources               |                                     | p value | Use of Informal sources             |                                     | p value |
|-------------------------------|----------------------------------------|-------------------------------------|-------------------------------------|---------|-------------------------------------|-------------------------------------|---------|
|                               |                                        | No<br>(n=1404)<br>Mean ± SD<br>N(%) | Yes<br>(n=103)<br>Mean ± SD<br>N(%) |         | No<br>(n=1243)<br>Mean ± SD<br>N(%) | Yes<br>(n=264)<br>Mean ± SD<br>N(%) |         |
| <b>Predisposing Factors</b>   |                                        |                                     |                                     |         |                                     |                                     |         |
| Child age in month            | 24.5±1.8                               | 24.5±1.9                            | 24.5±1.6                            | 0.920   | 24.5±1.8                            | 24.5±2.0                            | 0.593   |
| Child gender                  |                                        |                                     |                                     | 0.029   |                                     |                                     | 0.648   |
| Boys                          | 739 (49.4)                             | 678 (48.6)                          | 61 (59.8)                           |         | 614 (49.6)                          | 125 (48.1)                          |         |
| Girls                         | 758 (50.6)                             | 717 (51.4)                          | 41 (40.2)                           |         | 623 (50.4)                          | 135 (51.9)                          |         |
| Child ethnic background       |                                        |                                     |                                     | 0.020   |                                     |                                     | 0.508   |
| Dutch                         | 1161 (80.2)                            | 1093 (81.0)                         | 68 (69.4)                           |         | 966 (80.8)                          | 195 (77.7)                          |         |
| Other western                 | 107 (7.4)                              | 96 (7.1)                            | 11 (11.2)                           |         | 85 (7.1)                            | 22 (8.8)                            |         |
| Non-western                   | 179 (12.4)                             | 160 (11.9)                          | 19 (19.4)                           |         | 145 (12.1)                          | 34 (13.5)                           |         |
| Parental age in year          |                                        |                                     |                                     | 0.285   |                                     |                                     | 0.001   |
| ≥40                           | 166 (11.1)                             | 155 (11.1)                          | 11 (10.9)                           |         | 149 (12.1)                          | 17 (6.5)                            |         |
| 30-39                         | 1048 (70.1)                            | 983 (70.5)                          | 65 (64.4)                           |         | 870 (70.6)                          | 178 (67.7)                          |         |
| <29                           | 282 (18.9)                             | 257 (18.4)                          | 25 (24.8)                           |         | 214 (17.4)                          | 68 (25.9)                           |         |
| <b>Enabling Factors</b>       |                                        |                                     |                                     |         |                                     |                                     |         |
| Parental education level      |                                        |                                     |                                     | 0.001   |                                     |                                     | 0.170   |
| High                          | 883 (59.9)                             | 841 (61.1)                          | 42 (43.3)                           |         | 740 (61.1)                          | 143 (54.8)                          |         |
| Middle                        | 498 (33.8)                             | 449 (32.6)                          | 49 (50.5)                           |         | 399 (32.9)                          | 99 (37.9)                           |         |
| Low                           | 92 (6.2)                               | 86 (6.3)                            | 6 (6.2)                             |         | 73 (6.0)                            | 19 (7.3)                            |         |
| Parental work status          |                                        |                                     |                                     | 0.006   |                                     |                                     | 0.015   |
| Employed                      | 1213(81.2)                             | 1125 (82.5)                         | 70 (71.4)                           |         | 996 (82.9)                          | 199 (76.5)                          |         |
| Unemployed                    | 280 (18.8)                             | 238 (17.5)                          | 28 (28.6)                           |         | 205 (17.1)                          | 61 (23.5)                           |         |
| Family composition            |                                        |                                     |                                     | 0.210   |                                     |                                     | 0.054   |
| Two-parent family             | 1386 (93.8)                            | 1297 (94.0)                         | 89 (90.8)                           |         | 1149 (94.3)                         | 237 (91.2)                          |         |
| Single-parent family          | 92 (6.2)                               | 83 (6.0)                            | 9 (9.2)                             |         | 69 (5.7)                            | 23 (8.8)                            |         |
| <b>Need Factors</b>           |                                        |                                     |                                     |         |                                     |                                     |         |
| BITSEA Problem scale score    |                                        |                                     |                                     | <0.001  |                                     |                                     | 0.021   |
| No risk                       | 1400 (94.0)                            | 1319 (95.0)                         | 81 (80.2)                           |         | 1161 (94.6)                         | 239 (90.9)                          |         |
| At risk                       | 92 (6.0)                               | 70 (5.0)                            | 20 (19.8)                           |         | 66 (5.4)                            | 24 (9.1)                            |         |
| BITSEA Competence scale score |                                        |                                     |                                     | 0.001   |                                     |                                     | 0.352   |
| No risk                       | 1300 (88.0)                            | 1222 (88.7)                         | 78 (77.2)                           |         | 1074 (88.3)                         | 226 (86.3)                          |         |



| At risk                                                                 | 178 (12.0)  | 155(11.3)   | 23(22.8)  |        | 142 (11.7)  | 36 (13.7)  |        |
|-------------------------------------------------------------------------|-------------|-------------|-----------|--------|-------------|------------|--------|
| Stressful life events                                                   |             |             |           | 0.048  |             |            | 0.001  |
| No                                                                      | 749 (51.0)  | 708 (51.7)  | 41 (41.4) |        | 641 (53.0)  | 108 (41.7) |        |
| Yes                                                                     | 720 (49.0)  | 662 (48.3)  | 58 (58.6) |        | 569 (47.0)  | 151 (58.3) |        |
| General health of the child <sup>a</sup>                                |             |             |           | 0.007  |             |            | 0.153  |
| Good                                                                    | 1370 (92.2) | 1283(92.7)  | 87 (85.3) |        | 1135 (92.7) | 235 (90.0) |        |
| Poor                                                                    | 116 (7.8)   | 101 (7.3)   | 15 (14.7) |        | 90 (7.3)    | 26 (10.0)  |        |
| Parental satisfaction of child's development <sup>b</sup>               |             |             |           | <0.001 |             |            | 0.366  |
| Yes                                                                     | 1380 (94.7) | 1297(95.6)  | 83 (81.4) |        | 1135 (94.9) | 245 (93.5) |        |
| No                                                                      | 78 (5.3)    | 59(4.4)     | 19 (18.6) |        | 61 (5.1)    | 17 (6.5)   |        |
| Previous help-seeking                                                   |             |             |           | <0.001 |             |            | <0.001 |
| No                                                                      | 1208 (82.2) | 1151 (83.9) | 57 (58.8) |        | 1039 (85.8) | 169 (65.5) |        |
| Yes                                                                     | 261 (17.8)  | 221 (16.1)  | 40 (41.2) |        | 172 (14.2)  | 89 (34.5)  |        |
| Discussion of child socio-emotional development in the well-child visit |             |             |           | <0.001 |             |            | <0.001 |
| No                                                                      | 1196 (85.6) | 1148 (88.0) | 48 (52.2) |        | 1017 (87.6) | 179 (75.8) |        |
| Yes                                                                     | 201 (14.4)  | 157 (12.0)  | 44 (47.8) |        | 144 (12.4)  | 57 (24.2)  |        |

Note: This table presents non-imputed data. The missing numbers of variables are parental age (n=11), child gender (n=10), child ethnic background (n=60), parental educational level (n=34), parental work status (n=46), family composition (n=29), BITSEA Problem scale score (n=17), BITSEA Competence scale score (n=29), stressful life events (n=38), general health of the child (n=21), parental satisfaction of child's development (n=49), previous help-seeking (n=38), and discussion of child socio-emotional development in the well-child visit (n=110).

a. General health of the child was measured by the 4-item subscale General Health of the Infant Toddler Quality of Life Questionnaire (47 items).

b. Parental satisfaction of child's development was measured by the 5-item subscale Satisfaction of Child's Development of the Infant Toddler Quality of Life Questionnaire (47 items).

Abbreviation: SD=standard deviation; BITSEA= Brief Infant-Toddler Social and Emotional Assessment.

The bold print indicates  $p < 0.05$ .

Supplementary Table S5. Multivariate logistic regression model on independent factors and help-seeking with complete data (n=1168)

|                                    | <b>Model 1</b>         |           | <b>Model 2</b>          |           | <b>Model 3</b>      |           |
|------------------------------------|------------------------|-----------|-------------------------|-----------|---------------------|-----------|
|                                    | Predisposing variables |           | Plus enabling variables |           | Plus need variables |           |
|                                    | OR                     | 95% CI    | OR                      | 95% CI    | OR                  | 95% CI    |
| <b><i>Predisposing Factors</i></b> |                        |           |                         |           |                     |           |
| Child gender                       |                        |           |                         |           |                     |           |
| Boy                                | Ref                    |           | Ref                     |           | Ref                 |           |
| Girl                               | 0.86                   | 0.65-1.14 | 0.86                    | 0.65-1.14 | 0.93                | 0.69-1.25 |
| Child ethnic background            |                        |           |                         |           |                     |           |
| Dutch                              | Ref                    |           | Ref                     |           | Ref                 |           |
| Other western                      | 1.51                   | 0.90-2.54 | 1.45                    | 0.86-2.44 | 1.51                | 0.87-2.63 |
| Non-western                        | 1.52                   | 1.00-2.33 | 1.21                    | 0.77-1.90 | 1.18                | 0.72-1.91 |
| Parental age in year               |                        |           |                         |           |                     |           |
| >=40                               | Ref                    |           | Ref                     |           | Ref                 |           |
| 30-39                              | 1.67                   | 0.97-2.88 | 1.72                    | 0.99-2.96 | 1.51                | 0.86-2.65 |
| =<29                               | 2.87***                | 1.59-5.18 | 2.53**                  | 1.39-4.59 | 2.23*               | 1.20-4.15 |
| <b><i>Enabling Factors</i></b>     |                        |           |                         |           |                     |           |
| Parental education level           |                        |           |                         |           |                     |           |
| High                               |                        |           | Ref                     |           | Ref                 |           |
| Middle                             |                        |           | 1.27                    | 0.93-1.73 | 1.24                | 0.89-1.71 |
| Low                                |                        |           | 1.00                    | 0.52-1.94 | 0.93                | 0.46-1.87 |
| Parental work status               |                        |           |                         |           |                     |           |
| Employed                           |                        |           | Ref                     |           | Ref                 |           |
| Unemployed                         |                        |           | 1.59*                   | 1.11-2.27 | 1.32                | 0.90-1.95 |
| Family composition                 |                        |           |                         |           |                     |           |
| Two-parent family                  |                        |           | Ref                     |           | Ref                 |           |
| Single-parent family               |                        |           | 1.66                    | 0.91-3.03 | 1.46                | 0.77-2.75 |
| <b><i>Need Factors</i></b>         |                        |           |                         |           |                     |           |
| BITSEA Problem scale score         |                        |           |                         |           |                     |           |
| No risk                            |                        |           |                         |           | Ref                 |           |
| At risk                            |                        |           |                         |           | 0.96                | 0.51-1.81 |
| BITSEA Competence scale score      |                        |           |                         |           |                     |           |
| No risk                            |                        |           |                         |           | Ref                 |           |
| At risk                            |                        |           |                         |           | 1.35                | 0.85-2.14 |
| Stressful life events              |                        |           |                         |           |                     |           |
| No                                 |                        |           |                         |           | Ref                 |           |
| Yes                                |                        |           |                         |           | 1.45*               | 1.07-1.96 |

1  
2  
3  
4  
5  
6  
7  
8  
9  
10  
11  
12  
13  
14  
15  
16  
17  
18  
19  
20  
21  
22  
23  
24  
25  
26  
27  
28  
29  
30  
31  
32  
33  
34  
35  
36  
37  
38  
39  
40  
41  
42  
43  
44  
45  
46  
47  
48  
49  
50  
51  
52  
53  
54  
55  
56  
57  
58  
59  
60

|                                                                              |  |         |           |
|------------------------------------------------------------------------------|--|---------|-----------|
| General health of the child <sup>a</sup>                                     |  |         |           |
| Good                                                                         |  | Ref     |           |
| Poor                                                                         |  | 1.25    | 0.73-2.14 |
| Parental satisfaction of child's development <sup>b</sup>                    |  |         |           |
| Yes                                                                          |  | Ref     |           |
| No                                                                           |  | 1.58    | 0.81-3.09 |
| Previous help-seeking                                                        |  |         |           |
| No                                                                           |  | Ref     |           |
| Yes                                                                          |  | 2.71*** | 1.90-3.88 |
| Discussion of child social and emotional development in the well-child visit |  |         |           |
| No                                                                           |  | Ref     |           |
| Yes                                                                          |  | 2.67*** | 1.82-3.92 |

Model 1: The model with predisposing factors as independent variables.

Model 2: The model with predisposing and enabling factors as independent variables.

Model 3: The full model with predisposing, enabling, and need factors as independent variables.

a. General health of the child was measured by the 4-item subscale General Health of the Infant Toddler Quality of Life Questionnaire (47 items).

b. Parental satisfaction of child's development was measured by the 5-item subscale Satisfaction of Child's Development of the Infant Toddler Quality of Life Questionnaire (47 items).

Abbreviation: OR=Odds Ratio; CI=Confidence Interval; BITSEA= Brief Infant-Toddler Social and Emotional Assessment.

\*  $p < 0.05$ ; \*\*  $p < 0.01$ ; \*\*\*  $p < 0.001$ .

Supplementary Table S6. Chi-square test for homogeneity of complete data and imputed data

|                                          | Complete data<br>(n=1168)<br>N(%) | Imputed data<br>(n=1507)<br>N(%) | p value |
|------------------------------------------|-----------------------------------|----------------------------------|---------|
| <b>Predisposing Factors</b>              |                                   |                                  |         |
| Child gender                             |                                   |                                  |         |
| Boy                                      | 569 (48.7)                        | 744 (49.4)                       | 0.737   |
| Girl                                     | 599 (51.3)                        | 763 (50.6)                       |         |
| Child ethnic background                  |                                   |                                  |         |
| Dutch                                    | 959 (82.1)                        | 1202(79.8)                       | 0.260   |
| Other western                            | 83 (7.1)                          | 113 (7.5)                        |         |
| Non-western                              | 126 (10.8)                        | 192 (12.7)                       |         |
| Parental age in year                     |                                   |                                  |         |
| >=40                                     | 123 (10.5)                        | 167 (11.1)                       | 0.899   |
| 30-39                                    | 825 (70.6)                        | 1056 (70.1)                      |         |
| =<29                                     | 220 (18.8)                        | 284 (18.8)                       |         |
| <b>Enabling Factors</b>                  |                                   |                                  |         |
| Parental education level                 |                                   |                                  |         |
| High                                     | 717 (61.4)                        | 901 (59.8)                       | 0.394   |
| Middle                                   | 391 (33.5)                        | 511 (33.9)                       |         |
| Low                                      | 60 (5.1)                          | 95 (6.3)                         |         |
| Parental work status                     |                                   |                                  |         |
| Employed                                 | 958 (82.0)                        | 1227 (81.4)                      | 0.690   |
| Unemployed                               | 210 (18.0)                        | 280 (18.6)                       |         |
| Family composition                       |                                   |                                  |         |
| Two-parent family                        | 1111 (95.1)                       | 1407 (93.4)                      | 0.055   |
| Single-parent family                     | 57 (4.9)                          | 100 (6.6)                        |         |
| <b>Need Factors</b>                      |                                   |                                  |         |
| BITSEA Problem scale score               |                                   |                                  |         |
| No risk                                  | 1103 (94.4)                       | 1411 (93.6)                      | 0.385   |
| At risk                                  | 65 (5.6)                          | 96 (6.4)                         |         |
| BITSEA Competence scale score            |                                   |                                  |         |
| No risk                                  | 1045 (89.5)                       | 1318 (87.5)                      | 0.108   |
| At risk                                  | 123 (10.5)                        | 189 (12.5)                       |         |
| Stressful life events                    |                                   |                                  |         |
| No                                       | 606 (51.9)                        | 769 (51.0)                       | 0.661   |
| Yes                                      | 562(48.1)                         | 738 (49.0)                       |         |
| General health of the child <sup>a</sup> |                                   |                                  |         |
| Good                                     | 1081 (92.6)                       | 1390 (92.2)                      | 0.761   |

1  
2  
3  
4  
5  
6  
7  
8  
9  
10  
11  
12  
13  
14  
15  
16  
17  
18  
19  
20  
21  
22  
23  
24  
25  
26  
27  
28  
29  
30  
31  
32  
33  
34  
35  
36  
37  
38  
39  
40  
41  
42  
43  
44  
45  
46  
47  
48  
49  
50  
51  
52  
53  
54  
55  
56  
57  
58  
59  
60

|                                                                              |             |             |       |
|------------------------------------------------------------------------------|-------------|-------------|-------|
| Poor                                                                         | 87 (7.4)    | 117 (7.8)   |       |
| Parental satisfaction of child's development <sup>b</sup>                    |             |             |       |
| Yes                                                                          | 1112 (95.2) | 1428 (94.6) | 0.453 |
| No                                                                           | 56 (4.8)    | 82 (5.4)    |       |
| Previous help-seeking                                                        |             |             |       |
| No                                                                           | 971 (83.1)  | 1236 (82.0) | 0.451 |
| Yes                                                                          | 197 (16.9)  | 271 (18.0)  |       |
| Discussion of child social and emotional development in the well-child visit |             |             |       |
| No                                                                           | 1010 (86.5) | 1287 (85.4) | 0.430 |
| Yes                                                                          | 158 (13.5)  | 220 (14.6)  |       |

a. General health of the child was measured by the 4-item subscale General Health of the Infant Toddler Quality of Life Questionnaire (47 items).

b. Parental satisfaction of child's development was measured by the 5-item subscale Satisfaction of Child's Development of the Infant Toddler Quality of Life Questionnaire (47 items).

Abbreviation: BITSEA= Brief Infant-Toddler Social and Emotional Assessment.

P values are based on the independent chi-square test for complete data and imputed data groups.

STROBE Statement—Checklist of items that should be included in reports of *cohort studies*

|                              | Item No | Recommendation                                                                                                                                                                                    | Page No |
|------------------------------|---------|---------------------------------------------------------------------------------------------------------------------------------------------------------------------------------------------------|---------|
| <b>Title and abstract</b>    | 1       | (a) Indicate the study's design with a commonly used term in the title or the abstract                                                                                                            | 1       |
|                              |         | (b) Provide in the abstract an informative and balanced summary of what was done and what was found                                                                                               | 2       |
| <b>Introduction</b>          |         |                                                                                                                                                                                                   |         |
| Background/rationale         | 2       | Explain the scientific background and rationale for the investigation being reported                                                                                                              | 3,4     |
| Objectives                   | 3       | State specific objectives, including any prespecified hypotheses                                                                                                                                  | 4       |
| <b>Methods</b>               |         |                                                                                                                                                                                                   |         |
| Study design                 | 4       | Present key elements of study design early in the paper                                                                                                                                           | 4       |
| Setting                      | 5       | Describe the setting, locations, and relevant dates, including periods of recruitment, exposure, follow-up, and data collection                                                                   | 4,5     |
| Participants                 | 6       | (a) Give the eligibility criteria, and the sources and methods of selection of participants. Describe methods of follow-up                                                                        | 5       |
|                              |         | (b) For matched studies, give matching criteria and number of exposed and unexposed                                                                                                               | -       |
| Variables                    | 7       | Clearly define all outcomes, exposures, predictors, potential confounders, and effect modifiers. Give diagnostic criteria, if applicable                                                          | 5,6,7   |
| Data sources/<br>measurement | 8*      | For each variable of interest, give sources of data and details of methods of assessment (measurement). Describe comparability of assessment methods if there is more than one group              | -       |
| Bias                         | 9       | Describe any efforts to address potential sources of bias                                                                                                                                         | -       |
| Study size                   | 10      | Explain how the study size was arrived at                                                                                                                                                         | -       |
| Quantitative variables       | 11      | Explain how quantitative variables were handled in the analyses. If applicable, describe which groupings were chosen and why                                                                      | -       |
| Statistical methods          | 12      | (a) Describe all statistical methods, including those used to control for confounding                                                                                                             | 8       |
|                              |         | (b) Describe any methods used to examine subgroups and interactions                                                                                                                               | 8       |
|                              |         | (c) Explain how missing data were addressed                                                                                                                                                       | 8       |
|                              |         | (d) If applicable, explain how loss to follow-up was addressed                                                                                                                                    | -       |
|                              |         | (e) Describe any sensitivity analyses                                                                                                                                                             | 8       |
| <b>Results</b>               |         |                                                                                                                                                                                                   |         |
| Participants                 | 13*     | (a) Report numbers of individuals at each stage of study—eg numbers potentially eligible, examined for eligibility, confirmed eligible, included in the study, completing follow-up, and analysed | 5       |
|                              |         | (b) Give reasons for non-participation at each stage                                                                                                                                              | 5       |
|                              |         | (c) Consider use of a flow diagram                                                                                                                                                                | Figur2  |
| Descriptive data             | 14*     | (a) Give characteristics of study participants (eg demographic, clinical, social) and information on exposures and potential confounders                                                          | 9       |
|                              |         | (b) Indicate number of participants with missing data for each variable of interest                                                                                                               | 10      |
|                              |         | (c) Summarise follow-up time (eg, average and total amount)                                                                                                                                       | -       |
| Outcome data                 | 15*     | Report numbers of outcome events or summary measures over time                                                                                                                                    | 9       |

|    |                          |    |                                                                                                                                                                                                              |       |
|----|--------------------------|----|--------------------------------------------------------------------------------------------------------------------------------------------------------------------------------------------------------------|-------|
| 1  | Main results             | 16 | (a) Give unadjusted estimates and, if applicable, confounder-adjusted estimates and their precision (eg, 95% confidence interval). Make clear which confounders were adjusted for and why they were included | 12,13 |
| 2  |                          |    | (b) Report category boundaries when continuous variables were categorized                                                                                                                                    | -     |
| 3  |                          |    | (c) If relevant, consider translating estimates of relative risk into absolute risk for a meaningful time period                                                                                             | -     |
| 4  |                          |    |                                                                                                                                                                                                              |       |
| 5  |                          |    |                                                                                                                                                                                                              |       |
| 6  |                          |    |                                                                                                                                                                                                              |       |
| 7  |                          |    |                                                                                                                                                                                                              |       |
| 8  |                          |    |                                                                                                                                                                                                              |       |
| 9  | Other analyses           | 17 | Report other analyses done—eg analyses of subgroups and interactions, and sensitivity analyses                                                                                                               | 15    |
| 10 |                          |    |                                                                                                                                                                                                              |       |
| 11 | <b>Discussion</b>        |    |                                                                                                                                                                                                              |       |
| 12 |                          |    |                                                                                                                                                                                                              |       |
| 13 | Key results              | 18 | Summarise key results with reference to study objectives                                                                                                                                                     | 16    |
| 14 | Limitations              | 19 | Discuss limitations of the study, taking into account sources of potential bias or imprecision. Discuss both direction and magnitude of any potential bias                                                   | 17,18 |
| 15 |                          |    |                                                                                                                                                                                                              |       |
| 16 | Interpretation           | 20 | Give a cautious overall interpretation of results considering objectives, limitations, multiplicity of analyses, results from similar studies, and other relevant evidence                                   | 18    |
| 17 |                          |    |                                                                                                                                                                                                              |       |
| 18 |                          |    |                                                                                                                                                                                                              |       |
| 19 | Generalisability         | 21 | Discuss the generalisability (external validity) of the study results                                                                                                                                        | 18    |
| 20 |                          |    |                                                                                                                                                                                                              |       |
| 21 | <b>Other information</b> |    |                                                                                                                                                                                                              |       |
| 22 | Funding                  | 22 | Give the source of funding and the role of the funders for the present study and, if applicable, for the original study on which the present article is based                                                | 19    |
| 23 |                          |    |                                                                                                                                                                                                              |       |
| 24 |                          |    |                                                                                                                                                                                                              |       |

25  
26 \*Give information separately for exposed and unexposed groups.

27  
28 **Note:** An Explanation and Elaboration article discusses each checklist item and gives methodological background and  
29 published examples of transparent reporting. The STROBE checklist is best used in conjunction with this article (freely  
30 available on the Web sites of PLoS Medicine at <http://www.plosmedicine.org/>, Annals of Internal Medicine at  
31 <http://www.annals.org/>, and Epidemiology at <http://www.epidem.com/>). Information on the STROBE Initiative is  
32 available at <http://www.strobe-statement.org>.  
33  
34  
35  
36  
37  
38  
39  
40  
41  
42  
43  
44  
45  
46  
47  
48  
49  
50  
51  
52  
53  
54  
55  
56  
57  
58  
59  
60

# BMJ Open

## Correlates of help-seeking by parents for the socio-emotional development of their 3-year-old children: a longitudinal study.

|                                 |                                                                                                                                                                                                                                                                                                                                                                                          |
|---------------------------------|------------------------------------------------------------------------------------------------------------------------------------------------------------------------------------------------------------------------------------------------------------------------------------------------------------------------------------------------------------------------------------------|
| Journal:                        | <i>BMJ Open</i>                                                                                                                                                                                                                                                                                                                                                                          |
| Manuscript ID                   | bmjopen-2021-052595.R1                                                                                                                                                                                                                                                                                                                                                                   |
| Article Type:                   | Original research                                                                                                                                                                                                                                                                                                                                                                        |
| Date Submitted by the Author:   | 21-Oct-2021                                                                                                                                                                                                                                                                                                                                                                              |
| Complete List of Authors:       | Luo, Jie; Erasmus Medical Center, Department of Public Health Raat, Hein; Erasmus Medical Center, Department of Public Health Franse, Carmen; Erasmus Medical Center, Department of Public Health Bannink, Rienke; CJG Rijnmond, Afdeling Beleid & Onderzoek BAI, GUANNAN; Erasmus Medical Center, Department of Public Health van Grieken, Amy; Erasmus MC, Department of Public Health |
| <b>Primary Subject Heading</b>: | Public health                                                                                                                                                                                                                                                                                                                                                                            |
| Secondary Subject Heading:      | Health services research                                                                                                                                                                                                                                                                                                                                                                 |
| Keywords:                       | Child & adolescent psychiatry < PSYCHIATRY, MENTAL HEALTH, PRIMARY CARE                                                                                                                                                                                                                                                                                                                  |
|                                 |                                                                                                                                                                                                                                                                                                                                                                                          |

SCHOLARONE™  
Manuscripts





I, the Submitting Author has the right to grant and does grant on behalf of all authors of the Work (as defined in the below author licence), an exclusive licence and/or a non-exclusive licence for contributions from authors who are: i) UK Crown employees; ii) where BMJ has agreed a CC-BY licence shall apply, and/or iii) in accordance with the terms applicable for US Federal Government officers or employees acting as part of their official duties; on a worldwide, perpetual, irrevocable, royalty-free basis to BMJ Publishing Group Ltd ("BMJ") its licensees and where the relevant Journal is co-owned by BMJ to the co-owners of the Journal, to publish the Work in this journal and any other BMJ products and to exploit all rights, as set out in our [licence](#).

The Submitting Author accepts and understands that any supply made under these terms is made by BMJ to the Submitting Author unless you are acting as an employee on behalf of your employer or a postgraduate student of an affiliated institution which is paying any applicable article publishing charge ("APC") for Open Access articles. Where the Submitting Author wishes to make the Work available on an Open Access basis (and intends to pay the relevant APC), the terms of reuse of such Open Access shall be governed by a Creative Commons licence – details of these licences and which [Creative Commons](#) licence will apply to this Work are set out in our licence referred to above.

Other than as permitted in any relevant BMJ Author's Self Archiving Policies, I confirm this Work has not been accepted for publication elsewhere, is not being considered for publication elsewhere and does not duplicate material already published. I confirm all authors consent to publication of this Work and authorise the granting of this licence.

1  
2  
3 **1 Correlates of help-seeking by parents for the socio-emotional development of their 3-year-**  
4 **2 old children: a longitudinal study.**  
5  
6  
7  
8  
9  
10

11 **5 List of authors:**  
12

|       |                               |                           |                     |
|-------|-------------------------------|---------------------------|---------------------|
| 13 6  | Jie Luo <sup>1</sup>          | j.luo@erasmusmc.nl        | 0000-0002-0500-0101 |
| 14 7  | Hein Raat <sup>1</sup>        | h.raat@erasmusmc.nl       | 0000-0002-6000-7445 |
| 15 8  | Carmen B. Franse <sup>1</sup> | c.franse@erasmusmc.nl     | 0000-0002-7953-7817 |
| 16 9  | Rienke Bannink <sup>2</sup>   | r.bannink@cjgrijnmond.nl  | 0000-0002-6980-7107 |
| 17 10 | Guannan Bai <sup>1</sup>      | g.bai@erasmusmc.nl        | 0000-0003-0619-7580 |
| 18 11 | Amy van Grieken <sup>1*</sup> | a.vangrieken@erasmusmc.nl | 0000-0001-6767-9159 |

19  
20  
21  
22  
23  
24  
25  
26  
27  
28  
29  
30  
31  
32  
33

34 **15 Affiliations:**

35 16 <sup>1</sup> Erasmus Medical Center, Department of Public Health, Rotterdam, the Netherlands

36 17 <sup>2</sup> CJG Rijnmond (Youth Health Care Center), Rotterdam, the Netherlands

37  
38  
39  
40  
41  
42 19 \* Corresponding Author  
43  
44  
45  
46  
47  
48  
49  
50  
51  
52  
53  
54  
55  
56  
57  
58  
59  
60

## 24 **Abstract**

25 **Objectives** Timely parental help-seeking regarding their child's socio-emotional development is  
26 associated with a lower rate and lower severity of psychosocial problems in later life. This study  
27 aimed to examine the correlates of parental help-seeking for the socio-emotional development of  
28 3-year-old children.

29 **Design** Retrospective cohort study.

30 **Setting** Community-based survey in Rotterdam.

31 **Participants** Of 2305 parents and their 2-year-old children at baseline, 1507 who completed  
32 follow-up questionnaires were included in the analyses when children were three years old.

33 **Outcome measures** Parental help-seeking regarding their child's socio-emotional development  
34 and types of formal and informal help sources (e.g. General practitioner, internet) used in the past  
35 12 months were measured. Hierarchical logistic regression models were applied to identify factors  
36 correlates of parental help-seeking among thirteen predisposing, enabling, and need factors  
37 according to Andersen's Behavioral Model.

38 **Results** In total, 22.6% of parents reported help-seeking in the past 12 months for socio-  
39 emotional development of their 3-year-old child; 6.8% addressed formal help sources and 17.5%  
40 addressed informal help sources. General practitioner (2.7%) and family (12.5%) were the most  
41 frequently used formal and informal sources, respectively. In the full model, predisposing factors  
42 associated with higher odds of parental help-seeking were child's other western ethnic  
43 background (OR=1.66, 95%CI: 1.02-2.68) and parental age  $\leq$  29 years old (OR=1.71, 95%CI:  
44 1.01-2.92). No associated factors were found among enabling factors. The need factors  
45 associated with a higher odds of parental help-seeking were having previous help-seeking  
46 (OR=2.52, 95%CI: 1.83-3.48) and discussing child's socio-emotional development in the well-  
47 child visit (OR=2.47, 95%CI: 1.73-3.53).

48 **Conclusions** Predisposing and need factors were associated with parental help-seeking for  
49 socio-emotional development of 3-years-old children. The findings can be used to further develop  
50 support for parents accessing adequate information, prevention, and anticipatory care with regard  
51 to the child's socio-emotional development.

52

53

## 54 **Strengths and limitations of this study**

- 56 • A longitudinal dataset was realized from a diverse community population.
- 57 • A broad assessment of potential factors associated with parental help-seeking behavior,  
58 including predisposing, enabling, and need factors following Andersen's Behavioral Model, was  
59 performed.
- 60 • In total 14 formal and informal types of help-seeking sources were studied.
- 61 • Self-reported help-seeking behavior can be subject to social desirability bias and recall  
62 bias.
- 63 • Generalization is limited to the sample under study, the participation rate and loss to follow  
64 up were considerable.

## 65 **Introduction**

66 Psychosocial problems, such as attention deficit hyperactivity disorders (ADHD), conduct  
67 disorders, and anxiety disorders, are relatively common among young children.<sup>1, 2</sup> The literature  
68 suggests that 7%–25% of children worldwide experience psychosocial problems in early  
69 childhood (0-6 years).<sup>3-8</sup> Significantly, these psychosocial problems can track into adulthood.<sup>9-11</sup>  
70 Timely detection of (risk for) psychosocial problems and, consequently, offering appropriate  
71 interventions in early childhood can reduce problems and improve children's cognitive and  
72 academic performance.<sup>1, 2, 5</sup>

73 In order to identify psychosocial problems, validated instruments are often used for diagnosing  
74 emotional and behavioral problems in children under 18 years old.<sup>12 13-15</sup> At younger ages, certain  
75 behaviors (e.g. hitting, tantrums) can to some extent be part of the normal healthy development  
76 of psychosocial behavior of a child.<sup>16</sup> Therefore, for younger children instruments such as the  
77 Brief Infant–Toddler Social and Emotional Assessment (BITSEA) are used to detect 'at risk'  
78 behavior. Studies show that children's 'at-risk' behavior can change to not at-risk and vice versa  
79 over time.<sup>17, 18</sup> Since young children's ability to express their psychosocial well-being is developing,  
80 parents and professionals have an important role in monitoring the child's socio-emotional  
81 development<sup>19-21</sup> It is estimated that approximately one-third of parents seek help for the socio-  
82 emotional development of their children aged 4 to 11 who are at risk of psychosocial problems.<sup>22-25</sup>  
83 It is therefore important that parents take action for their concerns about their child's socio-  
84 emotional development to determine whether and what type of support is needed.

1  
2  
3 85 Help-seeking for such concerns might be guided by several factors, and, in this regard, Andersen  
4 86 and Newman provide a framework for health service use.<sup>26</sup> The framework postulates that the  
5 87 behavior of health service use depends on the three core groups of factors: (1) predisposing  
6 88 factors (demographic and social characteristics); (2) enabling factors (the ability to access  
7 89 services) and (3) need factors (the internal and external need for health care services). Previous  
8 90 studies have found that predisposing factors, such as child's ethnic background and gender, are  
9 91 associated with parental help-seeking.<sup>27-31</sup> Enabling factors, such as parents with higher  
10 92 educational levels and higher incomes, have been shown to positively encourage parents to seek  
11 93 help for their child's problem behavior (4-14 years old).<sup>32, 33</sup> An important need factor that has  
12 94 been reported to increase help-seeking by parents is recognition of the child's problem (6-11  
13 95 years old).<sup>23, 24, 34</sup> Meanwhile, single-parent families, the high cost of professional mental health  
14 96 services, and the self-stigma of parents have been indicated as barriers to help-seeking for  
15 97 children's socio-emotional development (3-11 years old).<sup>24, 35-37</sup> Thus far, research about parental  
16 98 help-seeking for the socio-emotional development has focused on school-aged children (4-12  
17 99 years old) and adolescents (12-18 years old) rather than preschool children (0-4 years old).<sup>29, 30,</sup>  
18 100 <sup>33, 38, 39</sup>

19  
20  
21  
22  
23  
24  
25  
26  
27  
28  
29 101 In the literature so far, parental help-seeking for socio-emotional problems of preschool children  
30 102 is rarely reported. Also, studies regarding parental help-seeking and children's socio-emotional  
31 103 problems are often evaluating on a limited number of potential correlates.<sup>40</sup> The current study  
32 104 aimed to identify correlates of parental help-seeking regarding the socio-emotional development  
33 105 of 3-year-old children. Following the Andersen & Newman framework, we studied the association  
34 106 between parental help-seeking and the three core factors: predisposing, enabling, and need  
35 107 factors. In addition, we explored the formal and informal help sources used in help-seeking.

## 36 108 **Methods**

### 37 109 **Study design and population**

38 110 For the present study, data were collected by parental questionnaires when the child was 2 years  
39 111 old and again with a follow up at 3 years old. In 2014 and 2015, parents living in the Rotterdam–  
40 112 Rijnmond area were invited by letter to participate in the study with their 2-year-old child. Parents  
41 113 were asked to complete and return the baseline questionnaire accompanied with a signed  
42 114 informed consent form when they visited the Dutch Preventive Youth Health Care (YHC) center  
43 115 for their regular well-child visit. In the Netherlands, regular well-child visits are one element of  
44 116 YHC which is offered free of charge to monitor and promote the health, well-being, and

1  
2  
3 117 development of children aged 0-19 years.<sup>39, 41, 42</sup> One year later, parents enrolled in the study  
4 118 received the follow-up questionnaire by e-mail or by mail with the request to return the completed  
5 119 questionnaire to the researchers in a pre-paid envelope.

6  
7  
8 120 From November 2014 to August 2015, 8937 parents attended for their 2-year child well-child visit,  
9 121 according to the YHC register. Of these, 2316 parents gave their consent to participate in the  
10 122 study (participation rate=25.9%) and 2305 parents completed the first questionnaires (response  
11 123 rate=99.5%). At the one-year follow-up, 1540 parents completed the second questionnaire.  
12 124 Children whose questionnaires were filled in by other caregivers instead of their parents (n=33)  
13 125 were excluded. Thus, 1507 participants were included in the analyses of this study (see Figure  
14 126 1).

### 15 127 Parental help-seeking

16 128 When the children were 3 years old, parental help-seeking was assessed by asking parents  
17 129 whether they had sought help in the past 12 months with regard to issues with their child's  
18 130 behavior or socio-emotional development. Parents could indicate yes/no whether they sought  
19 131 help at one or more of the following formal and informal help sources: 1) general practitioner (GP),  
20 132 2) youth protection services, 3) mental health care professionals (e.g., psychiatrist and child  
21 133 psychiatry outpatient clinic), 4) parenting support service (e.g., parenting courses and pedagogue  
22 134 service), 5) social worker, 6) family, 7) friend/acquaintance/neighbor, 8) internet, 9)  
23 135 complementary medicine (e.g., homoeopathy), 10) emergency telephone service, 11) prayer  
24 136 house (e.g., church, mosque or synagogue). There was an open answer possibility for parents to  
25 137 report other sources, and answers were recoded into the existing response categories or recoded  
26 138 into the new generated options: 12) book/magazines, 13) daycare center/school and 14)  
27 139 specialized medical care (e.g., clinical, rehabilitation). Parents could choose multiple options.  
28 140 When the parent chose one of the above options, one point was scored. A total score was  
29 141 generated by summing up all confirmatory responses (range 0-14). Total scores were  
30 142 dichotomized into 'no' (none confirmatory options) indicating parents did not seek help from any  
31 143 sources and 'yes' (one or more confirmatory options) indicating parent sought help from one or  
32 144 more help sources for children's socio-emotional development in the past 12 months.

### 33 145 Formal and informal help sources

34 146 The above response categories (1-14) were categorized into formal help sources and informal  
35 147 help sources. Formal help sources were GP (1), youth protection services (2), mental health care  
36 148 professionals (3), parenting support service (4), social worker (5), and specialized medical care  
37 149 (14). The remaining options were categorized as informal help: family (6),

1  
2  
3 150 friend/acquaintance/neighbor (7), internet (8), complementary medicine (9), emergency  
4 151 telephone service (10), prayer house (11), book/magazine (12) and daycare center/school (13).  
5  
6 152 Scores within each category were added up and two variables were generated: 'formal help  
7  
8 153 source used' and 'informal help source used'. For both variables, the responses were  
9  
10 154 dichotomized into 'no' (total score=0) and 'yes' (total scores $\geq$ 1).

## 11 155 Potential correlates of parental help-seeking

### 12 156 *Predisposing factors*

13  
14 157 Predisposing factors included child age, child gender, child ethnic background, and parental age  
15  
16 158 measured at child-age 2 years. Child age (in months) at time of measurement was calculated  
17  
18 159 from the date of birth. Child ethnic background (Dutch, other western, non-western) was defined  
19  
20 160 based on country of birth of both parents according to the Classification of Statistics  
21  
22 161 Netherlands.<sup>23, 43, 44</sup> When both parents were born in the Netherlands, the child was considered  
23  
24 162 to have a Dutch background. When one parent was born outside the Netherlands, this country of  
25  
26 163 birth determined child's ethnic background. When both parents were born outside the Netherlands,  
27  
28 164 mother's country of birth determined the child's ethnic background.<sup>23, 43</sup> Parental age (in years)  
29  
30 165 was reported by parents at baseline and classified into three categories based on the distribution:  
31  
32 166 '>=40 years', '30-39 years' and '<=29 years'.

### 33 167 *Enabling factors*

34  
35 168 Enabling factors assessed at 24 months included parental educational level, parental work status,  
36  
37 169 and family composition. Parental educational level was measured by one item asking about the  
38  
39 170 highest level of education finalized by the respondent (mother or father) at 24 months. Educational  
40  
41 171 level was categorized as high (higher vocational education, university), middle (higher secondary  
42  
43 172 education, vocational education), or low (primary education, lower secondary education).<sup>23, 44</sup>  
44  
45 173 Respondents to the questionnaire were asked to report their work status. Parental work status  
46  
47 174 reflects in 89.3% the mother's employment and 10.7% the father's work status. Parental work  
48  
49 175 status was classified as 'employed (including full-time job and part-time job)' and 'unemployed'.  
50  
51 176 The family composition was categorized into two-parent family or one-parent family.

### 52 177 *Need factors*

53  
54 178 Need factors assessed at 24 months included the BITSEA Problem and Competence scale,  
55  
56 179 stressful life events, child's general health, parental satisfaction of child's development, previous  
57  
58 180 help-seeking and discussing child's socio-emotional development in the well-child visit.

1  
2  
3 181 The BITSEA consists of a 31-item Problem scale and an 11-item Competence scale which  
4 182 measures psychosocial well-being in children 12-36 months. Each item is scored 0 for 'not true',  
5 183 1 for 'somewhat true', and 2 for 'certainly true'.<sup>45</sup> The items from the two scales of BITSEA are  
6 184 summed up independently. A score of 14 or higher on the Problem scale was categorized as 'at  
7 185 risk of psychosocial problems', and a score of 15 or lower on the competence scale was termed  
8 186 as 'at risk of competence delay'.<sup>13, 46</sup> In the Dutch population, the BITSEA Problem and  
9 187 Competence scale respectively had internal consistency Cronbach's alphas of 0.76 and 0.63,  
10 188 test-retest reliability of 0.75 and 0.61, and interrater reliability correlations of 0.30 and 0.17.<sup>47</sup>

11 189 Stressful life events were measured by assessing the occurrence of twelve stressful life events,  
12 190 such as a family relocation, divorce, or financial problems. If an event had happened, parents  
13 191 indicated when the specific life event happened: last year, 1-2 years ago, 3-4 years ago, or more  
14 192 than 4 years ago. When parents confirmed the occurrence of one event within the past two years  
15 193 (the first two options), one point was scored. If one event happened two years ago, then the event  
16 194 was not counted as a stressful life event for the child. A total score was calculated by summing  
17 195 up the points assigned. The stressful life events variable was generated with two categories based  
18 196 on the total score: total score 0 indicating 'no' and  $\geq 1$  'yes'.

19 197 The child's general health (good vs poor) and parental satisfaction of the child's development (yes  
20 198 vs no) were measured by two subscales of the Infant Toddler Quality of Life Questionnaire of 47  
21 199 items (ITQOL-SF47).<sup>48</sup> According to the user manual, the raw scores of each variable were  
22 200 transformed and dichotomized. The scores above the cut-off point indicated a child's good general  
23 201 health and parent-satisfied development, respectively.<sup>49</sup> The Dutch version of ITQOL-SF47 has  
24 202 relatively high reliability and validity: in this study the Cronbach's  $\alpha > 0.70$ , and all Test-retest  
25 203 Interclass Correlation Coefficients (ICCs)  $\geq 0.50$ .<sup>50</sup>

26 204 Previous help-seeking was assessed at 24 months with the question: 'Have you sought help for  
27 205 your child due to his/her socio-emotional development from the following sources in the past two  
28 206 years?'. The answer options (1-14) were the same as the help-seeking question at 36 months.  
29 207 These options were re-categorized in the same way: 'no' (none confirmatory options) and 'yes'  
30 208 (one or more confirmatory options).

31 209 The discussion of the child's socio-emotional development in the well-child visit was measured  
32 210 by one question: 'During the regular well-child visit with YHC when the child was two years old,  
33 211 were any specifics regarding your child's behavior, social, and emotional development discussed?'  
34 212 The options were 'no' and 'yes'.



### 213 Patient and public involvement statement

214 Neither patients nor the public was involved in the planning, design, conduct or reporting of this  
215 study.

### 216 Statistical analysis

217 Descriptive statistics were used to describe the characteristics of the study population.  
218 Hierarchical logistic regression models were fitted to investigate the correlates of help-seeking.  
219 Data were collected during the well-child visit when child was 2 years old, so the age of child was  
220 removed from the logistic regression analysis. All categorized variables were included as the  
221 independent variables by block. The Omnibus Test, a likelihood-ratio chi-square statistic, was  
222 used to assess the contribution of each block of variables to the model.<sup>51</sup> The first model (model  
223 1) regarded predisposing variables as independent variables. The second model (model 2)  
224 additionally included enabling variables as independent variables. Finally, a third full model  
225 (model 3) with all variables from the three blocks was fitted. Descriptive statistics were used to  
226 describe formal and informal help-seeking of parents. Multicollinearity was examined using  
227 correlation analyses for categorical variables. Maximal coefficient  $r=0.254$  indicated a weak  
228 correlation ( $0.2 < r < 0.4$ ), therefore, all variables were included in the regression analyses.

229 Furthermore, we assessed interactions between the 13 potential correlates of help-seeking  
230 behavior and child gender, child ethnic background, parental age, and parental education level  
231 with regard to the association with help-seeking. After applying Bonferroni correction for multiple  
232 testing ( $p=0.05/42=0.001$ ), no statistically significant interactions were found (Supplementary  
233 Table S1). A non-response analysis was conducted to assess differences between participants  
234 participating in follow-up and those lost to follow-up (Supplementary Table S2). The McNemar's  
235 test was applied to examine whether more parents used informal help sources among the parents  
236 who reported help-seeking (Supplementary Table S3). To provide more details, the  
237 characteristics of the study population by use of formal and those by use of informal sources were  
238 provided in the Supplementary Table S4.

239 Regarding the missing data among the sample of 1507 children, multiple imputation by Fully  
240 Conditional Specification (FCS) was used to deal with the missing values on all independent  
241 variables in SPSS.<sup>52-54</sup> The pooled results of five imputed datasets were used. Finally, we  
242 performed a sensitivity analysis using complete-case data without missing values to check the  
243 robustness of results (Supplementary Table S5). A p-value  $<0.05$  was considered to be  
244 statistically significant. All analyses were completed using the IBM SPSS version 25 (IBM Corp.,  
245 Armonk, NY, USA).

## Results

### Characteristics of the study population

Of all parents, 22.6% (n=341) reported help-seeking in the past 12 months for their 3-year-old child's psychosocial health; 6.8% (n=103) addressed formal help sources and 17.5% (n=264) addressed informal help sources. As for children, the mean age was 24.5 (SD=1.8) months (Table 1). Half of the children were boys (49.4%), 80.2% were Dutch, and 93.8% of the children lived in a two-parent family. Most parents were 30-39 years old (70.1%), employed (81.2%), and 59.6% had a high educational level. Regarding comparison between parents with help-seeking experience and their counterparts, two predisposing factors child age ( $p>0.05$ ) and child gender ( $p>0.05$ ) were not significantly different.

Table 1. Characteristics of the study population (n=1507)

| Items                       | Total<br>(n=1507)<br>Mean $\pm$ SD N(%) | Help-seeking                      |                                   | p value    |
|-----------------------------|-----------------------------------------|-----------------------------------|-----------------------------------|------------|
|                             |                                         | No (n=1166)<br>Mean $\pm$ SD N(%) | Yes (n=341)<br>Mean $\pm$ SD N(%) |            |
| <b>Predisposing Factors</b> |                                         |                                   |                                   |            |
| Child age in months         | 24.5 $\pm$ 1.8                          | 24.5 $\pm$ 1.8                    | 24.5 $\pm$ 1.9                    | 0.802      |
| Child gender                |                                         |                                   |                                   | 0.566      |
| Boys                        | 739 (49.4)                              | 568 (49.0)                        | 171 (50.7)                        |            |
| Girls                       | 758 (50.6)                              | 592 (51.0)                        | 166 (49.3)                        |            |
| Child ethnic background     |                                         |                                   |                                   | 0.026*     |
| Dutch                       | 1161 (80.2)                             | 917 (81.7)                        | 244 (75.1)                        |            |
| Other western               | 107 (7.4)                               | 75 (6.7)                          | 32 (9.8)                          |            |
| Non-western                 | 179 (12.4)                              | 130 (11.6)                        | 49 (15.1)                         |            |
| Parental age in years       |                                         |                                   |                                   | 0.003**    |
| $\geq$ 40                   | 166 (11.1)                              | 140 (12.1)                        | 26 (7.7)                          |            |
| 30-39                       | 1048 (70.1)                             | 818 (70.6)                        | 230 (68.0)                        |            |
| $\leq$ 29                   | 282 (18.9)                              | 200 (17.3)                        | 82 (24.3)                         |            |
| <b>Enabling Factors</b>     |                                         |                                   |                                   |            |
| Parental educational level  |                                         |                                   |                                   | 0.003**    |
| High                        | 883 (59.9)                              | 710(62.3)                         | 173 (52.0)                        |            |
| Middle                      | 498 (33.8)                              | 362 (31.8)                        | 136 (40.8)                        |            |
| Low                         | 92 (6.2)                                | 68 (6.0)                          | 24 (7.2)                          |            |
| Parental work status        |                                         |                                   |                                   | < 0.001*** |
| Employed                    | 1195(81.8)                              | 947 (83.9)                        | 248 (74.7)                        |            |
| Unemployed                  | 266 (18.2)                              | 182 (16.1)                        | 84 (25.3)                         |            |
| Family composition          |                                         |                                   |                                   | 0.004**    |
| Two-parent family           | 1386 (93.8)                             | 1084 (94.8)                       | 302 (90.4)                        |            |

|    |                                          |             |             |            |
|----|------------------------------------------|-------------|-------------|------------|
| 1  |                                          |             |             |            |
| 2  |                                          |             |             |            |
| 3  | Single-parent family                     | 92 (6.2)    | 60 (5.2)    | 32 (9.6)   |
| 4  | <b>Need Factors</b>                      |             |             |            |
| 5  |                                          |             |             |            |
| 6  | BITSEA Problem scale score               |             |             | < 0.001*** |
| 7  | No risk                                  | 1400 (94.0) | 1101 (95.6) | 299 (88.5) |
| 8  | At risk                                  | 90 (6.0)    | 51 (4.4)    | 39 (11.5)  |
| 9  |                                          |             |             |            |
| 10 | BITSEA Competence scale                  |             |             | 0.011*     |
| 11 | score                                    |             |             |            |
| 12 | No risk                                  | 1300 (88.0) | 1017 (89.1) | 283 (84.0) |
| 13 | At risk                                  | 178 (12.0)  | 124 (10.9)  | 54(16.0)   |
| 14 |                                          |             |             |            |
| 15 | Stressful life events                    |             |             | < 0.001*** |
| 16 | No                                       | 749 (51.0)  | 608 (53.5)  | 141 (42.3) |
| 17 | Yes                                      | 720 (49.0)  | 528 (46.5)  | 192 (57.7) |
| 18 |                                          |             |             |            |
| 19 | General health of the child <sup>a</sup> |             |             | 0.007**    |
| 20 | Good                                     | 1370 (92.2) | 1070(93.2)  | 300 (88.8) |
| 21 | Poor                                     | 116 (7.8)   | 78 (6.8)    | 38 (11.2)  |
| 22 |                                          |             |             |            |
| 23 | Parental satisfaction of                 |             |             | <0.001***  |
| 24 | child's development <sup>b</sup>         |             |             |            |
| 25 | Yes                                      | 1380 (94.7) | 1074(95.9)  | 306 (90.5) |
| 26 | No                                       | 78 (5.3)    | 46(4.1)     | 32 (9.5)   |
| 27 |                                          |             |             |            |
| 28 | Previous help-seeking                    |             |             | <0.001***  |
| 29 | No                                       | 1208 (82.2) | 992 (87.1)  | 216 (65.5) |
| 30 | Yes                                      | 261 (17.8)  | 147 (12.9)  | 114 (34.5) |
| 31 |                                          |             |             |            |
| 32 | Discussion of child's socio-             |             |             | <0.001***  |
| 33 | emotional development in                 |             |             |            |
| 34 | the well-child visit                     |             |             |            |
| 35 | No                                       | 1196 (85.6) | 980 (89.8)  | 216 (70.6) |
| 36 | Yes                                      | 201 (14.4)  | 111 (10.2)  | 90 (29.4)  |

37256 Note: This table presents non-imputed data.

38257 The missing numbers of variables are child gender (n=10), child ethnic background (n=60), parental age (n=11), parental  
 39258 educational level (n=34), parental work status (n=46), family composition (n=29), BITSEA Problem scale score (n=17), BITSEA  
 41259 Competence scale score (n=29), stressful life events (n=38), general health of the child (n=21), parental satisfaction of child's  
 42260 development (n=49), previous help-seeking (n=38), and discussion of child socio-emotional development in the well-child  
 43261 visit (n=110).

44262 Data presented as mean ± SD or number (percentage). Significant differences between two subgroups of help-seeking and  
 45263 non-help-seeking parents were evaluated at 0.05 level using independent T tests for continuous variables and  $\chi^2$  tests for  
 46264 categorical variables.

48265 a. General health of the child was measured by the 4-item subscale General Health of the Infant Toddler Quality of Life  
 49266 Questionnaire (47 items).

50267 b. Parental satisfaction of child's development was measured by the 5-item subscale Satisfaction of Child's Development of  
 51268 the Infant Toddler Quality of Life Questionnaire (47 items).

52269 Abbreviation: SD=standard deviation; BITSEA= Brief Infant-Toddler Social and Emotional Assessment.

53270 \*  $p < 0.05$ ; \*\*  $p < 0.01$ ; \*\*\*  $p < 0.001$ .

55

56

57

58

59

60

### 271 Correlates of parental help-seeking

272 Table 2 presents the results of logistic regression analyses. Model 1 with predisposing factors as  
 273 independent factors showed that having an other-western ethnic background (OR=1.73, 95%CI: 1.10-  
 274 2.71) and non-western ethnic background as a child (OR=1.51, 95%CI: 1.05-2.18) as well as parental  
 275 age =< 29 years old (OR=2.28, 95%CI: 1.38-3.77) were associated with parental help-seeking.

276 Model 2 shows the association between predisposing factors and enabling factors. Of predisposing  
 277 factors, having an other-western ethnic background (OR=1.66, 95%CI: 1.05-2.60) and parental age =<29  
 278 years old (OR=1.96, 95%CI: 1.17-3.27) were associated with parental help-seeking. Two enabling factors  
 279 parental educational level (OR=1.36, 95%CI: 1.04-1.79) and parental employed status (OR=1.47, 95%CI:  
 280 1.07-2.02) were associated with parental help-seeking.

281 In the full model (model 3), two predisposing factors having an other-western ethnic background as a  
 282 child (OR=1.66, 95%CI: 1.02-2.68) and parental age=<29 years old (OR=1.71, 95%CI: 1.01-2.92) were  
 283 associated with a higher odds for parental help-seeking. No associations were found between enabling  
 284 factors and parental help-seeking. Of the need factors, previous help-seeking (OR=2.52, 95%CI: 1.83-  
 285 3.48) and discussion of child socio-emotional development in the well-child visit (OR=2.47, 95%CI: 1.73-  
 286 3.53) were associated with a higher odds for parental help-seeking for socio-emotional development at  
 287 child age 3 years.

288 Table 2. Associations between predisposing, enabling, and need factors and parental help-seeking in the past 12  
 289 months for the 3-year-old child (n=1507)

|                             | Multivariate           |           |                         |           |                     |           |
|-----------------------------|------------------------|-----------|-------------------------|-----------|---------------------|-----------|
|                             | Model 1                |           | Model 2                 |           | Model 3             |           |
|                             | Predisposing variables |           | Plus enabling variables |           | Plus need variables |           |
| Block Statistics            | $\chi^2 = 22.38$       |           | $\chi^2 = 16.79$        |           | $\chi^2 = 107.09$   |           |
|                             | OR                     | 95% CI    | OR                      | 95% CI    | OR                  | 95% CI    |
| <b>Predisposing Factors</b> |                        |           |                         |           |                     |           |
| Child gender                |                        |           |                         |           |                     |           |
| Boys                        | Ref                    |           | Ref                     |           | Ref                 |           |
| Girls                       | 0.93                   | 0.73-1.19 | 0.93                    | 0.73-1.19 | 0.98                | 0.75-1.27 |
| Child ethnic background     |                        |           |                         |           |                     |           |
| Dutch                       | Ref                    |           | Ref                     |           | Ref                 |           |
| Other western               | 1.73*                  | 1.10-2.71 | 1.66*                   | 1.05-2.60 | 1.66*               | 1.02-2.68 |
| Non-western                 | 1.51*                  | 1.05-2.18 | 1.20                    | 0.81-1.78 | 1.18                | 0.77-1.79 |
| Parental age in year        |                        |           |                         |           |                     |           |
| >=40                        | Ref                    |           | Ref                     |           | Ref                 |           |

|    |                                                                         |        |           |       |           |         |           |
|----|-------------------------------------------------------------------------|--------|-----------|-------|-----------|---------|-----------|
| 1  |                                                                         |        |           |       |           |         |           |
| 2  |                                                                         |        |           |       |           |         |           |
| 3  | 30-39                                                                   | 1.56   | 0.99-2.46 | 1.57  | 1.00-2.46 | 1.45    | 0.90-2.32 |
| 4  | =<29                                                                    | 2.28** | 1.38-3.77 | 1.96* | 1.17-3.27 | 1.71*   | 1.01-2.92 |
| 5  |                                                                         |        |           |       |           |         |           |
| 6  | <b>Enabling Factors</b>                                                 |        |           |       |           |         |           |
| 7  | Parental educational level                                              |        |           |       |           |         |           |
| 8  | High                                                                    |        |           | Ref   |           | Ref     |           |
| 9  | Middle                                                                  |        |           | 1.36* | 1.04-1.79 | 1.30    | 0.97-1.74 |
| 10 | Low                                                                     |        |           | 1.12  | 0.67-1.89 | 1.10    | 0.63-1.90 |
| 11 |                                                                         |        |           |       |           |         |           |
| 12 | Parental work status                                                    |        |           |       |           |         |           |
| 13 | Employed                                                                |        |           | Ref   |           | Ref     |           |
| 14 | Unemployed                                                              |        |           | 1.47* | 1.07-2.02 | 1.28    | 0.91-1.80 |
| 15 |                                                                         |        |           |       |           |         |           |
| 16 | Family composition                                                      |        |           |       |           |         |           |
| 17 | Two-parent family                                                       |        |           | Ref   |           | Ref     |           |
| 18 | Single-parent family                                                    |        |           | 1.51  | 0.95-2.41 | 1.31    | 0.80-2.15 |
| 19 |                                                                         |        |           |       |           |         |           |
| 20 | <b>Need Factors</b>                                                     |        |           |       |           |         |           |
| 21 | BITSEA Problem scale score                                              |        |           |       |           |         |           |
| 22 | No risk                                                                 |        |           |       |           | Ref     |           |
| 23 | At risk                                                                 |        |           |       |           | 1.20    | 0.72-1.99 |
| 24 |                                                                         |        |           |       |           |         |           |
| 25 | BITSEA Competence scale score                                           |        |           |       |           |         |           |
| 26 | No risk                                                                 |        |           |       |           | Ref     |           |
| 27 | At risk                                                                 |        |           |       |           | 1.18    | 0.78-1.79 |
| 28 |                                                                         |        |           |       |           |         |           |
| 29 | Stressful life events                                                   |        |           |       |           |         |           |
| 30 | No                                                                      |        |           |       |           | Ref     |           |
| 31 | Yes                                                                     |        |           |       |           | 1.29    | 0.98-1.68 |
| 32 |                                                                         |        |           |       |           |         |           |
| 33 | General health of the child <sup>a</sup>                                |        |           |       |           |         |           |
| 34 | Good                                                                    |        |           |       |           | Ref     |           |
| 35 | Poor                                                                    |        |           |       |           | 1.16    | 0.73-1.85 |
| 36 |                                                                         |        |           |       |           |         |           |
| 37 | Parental satisfaction of child's development <sup>a</sup>               |        |           |       |           |         |           |
| 38 | Yes                                                                     |        |           |       |           | Ref     |           |
| 39 | No                                                                      |        |           |       |           | 1.35    | 0.75-2.45 |
| 40 |                                                                         |        |           |       |           |         |           |
| 41 | Previous help-seeking                                                   |        |           |       |           |         |           |
| 42 | No                                                                      |        |           |       |           | Ref     |           |
| 43 | Yes                                                                     |        |           |       |           | 2.52*** | 1.83-3.48 |
| 44 |                                                                         |        |           |       |           |         |           |
| 45 | Discussion of child socio-emotional development in the well-child visit |        |           |       |           |         |           |
| 46 | No                                                                      |        |           |       |           | Ref     |           |
| 47 | Yes                                                                     |        |           |       |           | 2.47*** | 1.73-3.53 |
| 48 |                                                                         |        |           |       |           |         |           |

53290 Abbreviation: OR=Odds Ratio; CI=Confidence Interval; BITSEA= Brief Infant-Toddler Social and Emotional Assessment.  $\chi^2 =$

54291 Model chi-square for each block of variables, all significant at  $p < 0.05$ .

55292 Model 1: The model with predisposing factors as independent variables.

56

57

58

59

60

1  
2  
3  
4  
5  
6  
7  
8  
9  
10  
11  
12  
13  
14  
15  
16  
17  
18  
19  
20  
21  
22  
23  
24  
25  
26  
27  
28  
29  
30  
31  
32  
33  
34  
35  
36  
37  
38  
39  
40  
41  
42  
43  
44  
45  
46  
47  
48  
49  
50  
51  
52  
53  
54  
55  
56  
57  
58  
59  
60

293 Model 2: The model with predisposing and enabling factors as independent variables.

294 Model 3: The full model with predisposing, enabling, and need factors as independent variables.

295 a. General health of the child was measured by the 4-item subscale General Health of the Infant Toddler Quality of Life  
296 Questionnaire (47 items).

297 b. Parental satisfaction of child's development was measured by the 5-item subscale Satisfaction of Child's Development of  
298 the Infant Toddler Quality of Life Questionnaire (47 items).

299 \*  $p < 0.05$ ; \*\*  $p < 0.01$ ; \*\*\*  $p < 0.001$

For peer review only

### Use of formal and informal help sources

Table 3 shows the frequency of formal and informal help sources used in parental help-seeking for their 3-year-old child's socio-emotional development in the past 12 months. Among the 341 parents who reported help-seeking, fewer parents (n=163) reported the use of formal help sources than parents (n=264) who reported the use of informal help sources ( $p<0.001$ , Supplementary Table S3); only 26 (7.6%) parents used both formal and informal help sources. The GP (12.0%) and parenting support services, such as parenting courses (9.4%), were the most frequently used formal help source. Family (55.4%) and friends/acquaintance/neighbor (40.5%) were the most frequently used informal help sources. Characteristics of the study population by use of formal and informal sources in parental help-seeking are presented in Supplementary Table S4.

Table 3. Use of formal and informal help sources in parental help-seeking in the past 12 months for the 3-year-old child (n=1507)

|                                                   | n          | Total sample (%)<br>(n=1507) | Help-seeking (Yes) (%)<br>(n=341) |
|---------------------------------------------------|------------|------------------------------|-----------------------------------|
| <b>Parents reported use of help sources (yes)</b> | 341        | 22.6                         | 100.0                             |
| Formal and informal help sources                  | 26         | 1.7                          | 7.6                               |
| Formal help source(s) only                        | 77         | 5.1                          | 22.6                              |
| Informal help source(s) only                      | 238        | 15.8                         | 69.8                              |
| <b>Type of help sources</b>                       |            |                              |                                   |
| Formal Sources (yes)                              | <u>103</u> | <u>6.8</u>                   | <u>30.2</u>                       |
| General practitioner                              | 41         | 2.7                          | 12.0                              |
| Parenting support service                         | 32         | 2.1                          | 9.4                               |
| Specialized medical care                          | 20         | 1.3                          | 5.9                               |
| Youth protection services                         | 18         | 1.2                          | 5.3                               |
| Mental health care professionals                  | 11         | 0.7                          | 3.2                               |
| Social worker                                     | 1          | 0.1                          | 0.3                               |
| Informal Sources (yes)                            | <u>264</u> | <u>17.5</u>                  | <u>77.4</u>                       |
| Family                                            | 189        | 12.5                         | 55.4                              |
| Friend/acquaintance/neighbor                      | 138        | 9.2                          | 40.5                              |
| Internet                                          | 71         | 4.7                          | 20.8                              |
| Daycare center/school                             | 12         | 0.8                          | 3.5                               |
| Complementary medicine                            | 4          | 0.3                          | 1.2                               |
| Emergency telephone service                       | 3          | 0.2                          | 0.9                               |
| Book/magazine                                     | 2          | 0.1                          | 0.6                               |
| Prayer house                                      | 1          | 0.1                          | 0.3                               |

Note. Parents could endorse more than one option; hence, the sum of each subcategory does not total up to 100%.

### Additional data analyses

Compared to participants lost in the follow-up (n=775), participants in the follow-up (n=1540) were, as a child, more likely to be at a younger age and have a Dutch ethnic background and, as a parent, to be at an older age and have a higher educational level (all  $p < 0.001$ ). No significant differences were found between boys and girls ( $p > 0.05$ ) (Supplementary Table S2).

Supplementary Table S5 shows the results of multivariate logistic regression conducted with complete data. There was a difference between the full models of multivariate logistic regression conducted with non-imputed data and those with imputed data. In the imputed data analysis, parents of a child with other-western ethnic background (OR=1.66, 95%CI: 1.02-2.68) in the predisposing block were more likely to have help-seeking. This association was not significant (OR=1.51, 95%CI: 0.87-2.63) in the analysis conducted with complete data. On the other hand, stressful life events (OR=1.45, 95%CI: 1.07-1.96) in the need block were associated with help-seeking in the complete data analysis but not in the imputed data analysis (OR=1.29, 95%CI: 0.98-1.68). Although the significance of the two factors changed, the pattern of relevant factors was similar. The rest of the factors in three blocks kept the same association and significance in the imputed data analysis and the complete data analysis, thereby indicating the robustness of the model. Furthermore, we conducted the Chi-square test of homogeneity, which showed that there were no significant differences (all p-values  $> 0.05$ ) between the characteristics of the imputed data and the complete data (Supplementary Table S6).



## Discussion

In the present study, correlates of parental help-seeking for the socio-emotional development of 3-year-old children were studied. Among predisposing factors, having an other-western ethnic background as a child and parental age younger than 29 years old indicated a higher odds of parental help-seeking for the socio-emotional development of children aged 3 years. Also, previous help-seeking and discussing the child's socio-emotional development in the well-child visit as need factors were associated with a higher odds for parental help-seeking. No correlate of parental help-seeking was found among enabling factors.

In the present study predisposing, enabling, and need factors were evaluated in relation to help-seeking behavior. The Andersen & Newman's framework composes of environment, population characteristics, health behavior, and outcome related to help-seeking behavior.<sup>55</sup> In the current study the information on the environment (including the health care system and external environment), and the information on the outcome (including perceived health status, evaluated health status, and consumer satisfaction) was not collected. We recommend future studies to get a complete overview of factors associated with help-seeking behavior. The findings of predisposing factors indicated parents of child with other-western background were more like to seek help, compared with parents of Dutch children. Existing studies on the association between minority ethnic background and help-seeking for children's socio-emotional development have shown conflicting results.<sup>29, 39, 56, 57</sup> These differing results may be due to the different characteristics of minor ethnic backgrounds as well as differing help-seeking measures among the studies.<sup>22, 39</sup> Although parents of children from minority ethnic background perceived more barriers to access formal help-seeking, studies report these parents are able to access informal help sources as easily and as equally to native parents<sup>35, 58-60</sup> Moreover, the health care framework in the Netherlands (e.g. equal primary care, collaboration of professionals in the community, universal health care), and social contexture (e.g. language and cultural similarity) may partly reduce barriers to health care among the parents with other-western background.<sup>61-63</sup> Besides the child's other-western background, as a predisposing factor, parental age was also associated with help-seeking: younger parents were more likely to seek help for their 3-year-old child. Previous studies have reported first-time parents to be more open and actively involved in searching for information about parenting and child development.<sup>64</sup> First-time parents are also more likely to reach out for help.<sup>65</sup> In the current study, we were unable to adapt for the parity of the child; therefore, we were not able to evaluate whether this explanation might hold for our findings.

With regard to enabling factors without correction for the need factors, parental educational level and employment status were associated with help-seeking. After correction for the need factors, parental educational level, employment status and family composition were not significantly associated. Studies

1  
2  
3 365 on association between three enabling factors and help-seeking have reported contrary results. In the  
4  
5 366 Netherlands, equal access to primary care (e.g. GPs and YHC), to comprehensive care professionals in  
6  
7 367 clinics and communities, and to universal health care may reduce the barriers for parents in the enabling  
8 368 domain.<sup>61, 62</sup> Similar results have been found in other studies conducted in a similar context.<sup>60, 66, 67</sup>  
9

10 369 The need factors in the Andersen & Newman's framework consist of perceived need and evaluated  
11  
12 370 need.<sup>55</sup> Parent-reported general health of the child and parental satisfaction with child's development  
13 371 reflect most closely the perceived need, while the BITSEA-score and discussion with YHC professionals  
14  
15 372 most closely reflect the evaluated need (i.e., being more clinical assessments). With regard to need  
16  
17 373 factors, we observed that parents seeking any help for their child's socio-emotional development before  
18 374 the age of 2 years were more likely to seek help in the past 12 months at child age 3 years. It is plausible  
19  
20 375 that parents who had previous help-seeking may be able to deal better with barriers (e.g. parents' self-  
21 376 stigma) and with exploring more sources in terms of help-seeking.<sup>39</sup> In addition, the literature regarding  
22  
23 377 the use of mental health service for children and adolescents suggests that social and emotional  
24 378 problems exist over a longer period of time.<sup>30, 68</sup> Therefore, it is suggested that for actual problem behavior  
25  
26 379 longitudinal care is needed.<sup>11, 25, 69</sup> Consequently, findings underline the importance of YHC in monitoring  
27  
28 380 advice for children's socio-emotional development. Furthermore, parents who had previously discussed  
29 381 their child's socio-emotional development in the well-child visit at the child age of 2 years, were more  
30  
31 382 likely to seek help in the past 12 months. In the Netherlands, the discussion during the well-child visit  
32 383 could be raised by parents or YHC professionals. The YHC professionals can suggest a discussion based  
33  
34 384 on the evaluation of the child's socio-emotional development. Parents also can consult on this issue if  
35 385 they are concerned about their child's socio-emotional development. In this capacity, the YHC  
36  
37 386 professional assists the parent to recognize early childhood psychosocial problems. Although recognition  
38  
39 387 of problem behavior by parents has been reported to be difficult for parents, it is important for them to be  
40 388 able to seek help in time.<sup>5, 20, 23, 28, 29</sup> The YHC thus plays a crucial role in screening and identifying  
41  
42 389 children's social and emotional problems in the Netherlands.<sup>70</sup>  
43

44 390 In total, 6.0% of 1507 children were at risk of socio-emotional problems measured by BITSEA Problem  
45  
46 391 scale, and 12% were at risk of delay of socio-emotional competence measured by BITSEA Competence  
47  
48 392 scale. The rates of socio-emotional development problems in this study were comparable with these  
49 393 measured by other instruments, such as 17% at moderate risk and 11% at high risk of developmental  
50  
51 394 delays measured by the Parent Evaluation of Developmental Status among children (0-5 years old) in  
52 395 the American National Survey of Children's Health.<sup>71, 72</sup> Consistent with previous studies in school-aged  
53  
54 396 children, our results showed that formal help sources were used less frequently than informal help  
55 397 sources for children's socio-emotional development.<sup>24, 34</sup> Gaining access to formal help sources may have  
56  
57

1  
2  
3 398 more barriers, such as iterative referral processes, long waiting times, and high costs.<sup>35, 58, 73</sup> The informal  
4 help sources most often used in this study were the parental social network as well as information from  
5 399 books and the internet.<sup>59, 74</sup> Accordingly, compared with formal help sources, informal help sources might  
6 400 be more directly available and accessible for parents when they are seeking help for their children's  
7 401 socio-emotional development.<sup>27, 73</sup>  
8  
9  
10 402

11  
12 403 Timely parental help-seeking for the socio-emotional development of children is associated with a lower  
13 rate and lower severity of psychosocial problems in later life.<sup>1, 2, 5</sup> This study provides insight into parental  
14 404 help-seeking when their children are very young. The findings indicated that parents of preschool children  
15 405 for example most frequently used help sources close by, such as family, whilst books and magazines  
16 were less frequently utilized. In addition, investments might be made towards improving parents' access  
17 406 to formal health care use for their children (e.g., provide the access to online consultation given by  
18 407 psychological professionals). Previous research has suggested, especially among non-native parents,  
19 limited and difficult access to health care facilities.<sup>28, 75</sup> Longitudinal and experimental studies are  
20 408 recommended to examine the differential pathways between parent-perceived versus diagnosed child  
21 psychosocial problems and the use of health care. A range of factors should be studied as contemplated  
22 409 by the Andersen model; taking into account access parents have to health care, but also barriers they  
23 410 perceive to make use of health care. Qualitative and quantitative methods should be combined.  
24  
25 411  
26 412  
27  
28 413  
29  
30 414

31  
32 415 The present study has several strengths. First, the longitudinal correlates between predisposing, enabling,  
33 416 and need factors and parental help-seeking were studied among a large community sample of parents  
34 of 3-year-old children. Parental help-seeking for children under 4 years old is rarely studied.<sup>22, 24, 34</sup>  
35 417 Second, formal and informal help sources in parental help-seeking were included. Specifically, a broad  
36 418 range of informal help sources, e.g., internet, books, complementary medicine and religious institutes  
37 were assessed. Nevertheless, there were some limitations that need to be addressed. First, help-seeking  
38 419 for perceived social and emotional problems was parent-reported. Parents may have under- or  
39 overestimated their child's socio-emotional development. The assessment focussed on parents'  
40 420 perceived socio-emotional problems contrary to a clinical diagnosis. In our analyses, we did correct for  
41 421 risk of psychosocial problems at age 2-years, assessed by the BITSEA. A combination of clinical  
42 diagnose instruments, such as the Child Behavior Checklist (CBCL), with parent perceived problems may  
43 422 contribute to a better understanding of parental help-seeking behavior.<sup>14</sup> Second, information on the help-  
44 423 seeking is self-reported and recall bias is possible; however, the one-year recall might have decreased  
45 recall inaccuracy.<sup>76</sup> Third, the multivariate regression analyses showed a slight difference between results  
46 424 conducted with the complete data and those with the imputed data. Therefore, we assessed the  
47 425 homogeneity of the above two datasets (Supplementary Table S6) and found no significant difference in  
48  
49 426  
50  
51 427  
52 428  
53  
54 429  
55 430  
56  
57  
58  
59  
60

1  
2  
3 431 the characteristics of the two populations ( $p>0.05$ ). Fourth, a limitation is the participation rate and the  
4  
5 432 loss to follow-up in the present study. The participation rate was 25.9% which is lower than reported  
6 433 participation rates in large birth cohorts (around 30-40%).<sup>77</sup> We were not able to receive information from  
7  
8 434 parents themselves as to why they refused to participate. Common reasons for non-participation are a  
9  
10 435 lack of interest or a lack of time.<sup>78,79</sup> In addition, we cannot ascertain that all parents received the invitation  
11 436 to participate nor that they actually visited YHC at the child aged 2 years. Furthermore, the parents with  
12  
13 437 a younger child, a Dutch ethnic background, an older age, and a higher education level were more likely  
14 438 to participate in the follow-up of the study. Consequently, the findings are applicable to the population  
15  
16 439 under study. Regardless, efforts should be made to involve hard-to-reach populations in research studies.  
17  
18 440 Finally, a lack of repeated measurements did not allow us to establish the causal association in the  
19 441 current study.

## 20 21 442 22 23 24 443 **Conclusion**

25 444 The predisposing, enabling, and needs factors correlated with help-seeking by parents of preschool  
26  
27 445 children with regard to their child's socio-emotional development were evaluated. The factors non-  
28  
29 446 western ethnic background, younger age of the parent, previous help-seeking and specific discussions  
30 447 about the child's socio-emotional development during the well-child visit were associated with the  
31  
32 448 presence of parental help-seeking. Parents reported using informal help sources more often than formal  
33 449 help sources. The findings can be used to further develop support for parents to access adequate  
34  
35 450 information, prevention, and anticipatory care with regard to their child's socio-emotional development.

1  
2  
3  
4  
5  
6  
7  
8  
9  
10  
11  
12  
13  
14  
15  
16  
17  
18  
19  
20  
21  
22  
23  
24  
25  
26  
27  
28  
29  
30  
31  
32  
33  
34  
35  
36  
37  
38  
39  
40  
41  
42  
43  
44  
45  
46  
47  
48  
49  
50  
51  
52  
53  
54  
55  
56  
57  
58  
59  
60

## 451 **Footnotes**

452 **Funding:** This work was supported by ZonMw, grant number 729301001. Jie Luo was funded by the  
453 Chinese Government Scholarship (CN), grant number 201806170061.

454 **Competing interests:** Non-financial associations that may be relevant to the submitted manuscript.

455 **Ethics approval:** The Medical Ethical Committee of the Erasmus Medical Center Rotterdam declared  
456 that the Medical Research Involving Human Subject Act (Dutch abbreviation WMO) did not apply to the  
457 present study and, subsequently, permission was given to carry out the study and to publish the results  
458 in scientific journals (number MEC-2014-152). This study was conducted by following the guidelines  
459 proposed in the World Medical Association Declaration of Helsinki.

460 **Contributors:** HR obtained the funding. HR, AG, and RB managed the research and undertook data  
461 collection. CBF, JL, AG, and HR conceived the research described in this paper. JL analyzed the data.  
462 All authors provided input in interpreting the data. JL drafted the manuscript with input of AG , CBF, HR  
463 and GB. All authors critically reviewed and approved the manuscript.

464 **Word Count:** 3981 words (excluding the title page, abstract, tables, footnotes and references)

465 **Data statement:** No additional data available

## References

1. Egger HL, Angold A. Common emotional and behavioral disorders in preschool children: Presentation, nosology, and epidemiology. *J Child Psychol Psychiatry*. 2006;**47**:313-37. <https://doi.org/10.1111/j.1469-7610.2006.01618.x>
2. Kieling C, Baker-Henningham H, Belfer M, *et al*. Child and adolescent mental health worldwide: Evidence for action. *Lancet*. 2011;**378**:1515-25. [https://doi.org/10.1016/s0140-6736\(11\)60827-1](https://doi.org/10.1016/s0140-6736(11)60827-1)
3. Klitzing Kv, Döhnert M, Kroll M, *et al*. Mental disorders in early childhood. *Dtsch Arztebl International*. 2015;**112**:375-86. <https://doi.org/10.3238/arztebl.2015.03754496484>
4. Kariuki SM, Abubakar A, Kombe M, *et al*. Burden, risk factors, and comorbidities of behavioural and emotional problems in kenyan children: A population-based study. *Lancet Psychiatry*. 2017;**4**:136-45. [https://doi.org/10.1016/s2215-0366\(16\)30403-5PMC5285446](https://doi.org/10.1016/s2215-0366(16)30403-5PMC5285446)
5. Vitrikas K, Savard D, Bucaj M. Developmental delay: When and how to screen. *Am Fam Physician*. 2017;**96**:36-43
6. Wichstrøm L, Berg-Nielsen TS, Angold A, *et al*. Prevalence of psychiatric disorders in preschoolers. *J Child Psychol Psychiatry*. 2012;**53**:695-705. <https://doi.org/10.1111/j.1469-7610.2011.02514.x>
7. Skovgaard AM. Mental health problems and psychopathology in infancy and early childhood. *Dan Med Bull*. 2010;**57**:B4193
8. Anselmi L, Piccinini CA, Barros FC, *et al*. Psychosocial determinants of behaviour problems in brazilian preschool children. *Journal of Child Psychology and Psychiatry*. 2004;**45**:779-88. <https://doi.org/10.1111/j.1469-7610.2004.00271.x>
9. Hemmi MH, Wolke D, Schneider S. Associations between problems with crying, sleeping and/or feeding in infancy and long-term behavioural outcomes in childhood: A meta-analysis. *Arch Dis Child*. 2011;**96**:622. <https://doi.org/10.1136/adc.2010.191312>
10. Holtmann M, Buchmann AF, Esser G, *et al*. The child behavior checklist-dysregulation profile predicts substance use, suicidality, and functional impairment: A longitudinal analysis. *J Child Psychol Psychiatry*. 2011;**52**:139-47. <https://doi.org/10.1111/j.1469-7610.2010.02309.x>
11. O'Connor C, Reulbach U, Gavin B, *et al*. A prospective longitudinal investigation of the (dis)continuity of mental health difficulties between mid- to late-childhood and the predictive role of familial factors. *Eur Child Adolesc Psychiatry*. 2018;**27**:289-300. <https://doi.org/10.1007/s00787-017-1044-5>
12. de Ross RL, Gullone E, Chorpita BF. The revised child anxiety and depression scale: A psychometric. *Behav Change*. 2002;**19**:2. <https://doi.org/10.1007/s10862-021-09879-y>
13. Briggs-Gowan MJ, Carter AS, Irwin JR, *et al*. The brief infant-toddler social and emotional assessment: Screening for social-emotional problems and delays in competence. *J Pediatr Psychol*. 2004;**29**:143-55. <https://doi.org/10.1093/jpepsy/jsh017>
14. Achenbach TM. The child behavior checklist and related instruments. 1999
15. Muris P, Meesters C, van den Berg F. The strengths and difficulties questionnaire (sdq). *Eur Child Adolesc Psychiatry*. 2003;**12**:1-8. [10.1007/s00787-003-0298-2](https://doi.org/10.1007/s00787-003-0298-2)
16. Malik F, Marwaha R. Developmental stages of social emotional development in children. Statpearls. Treasure Island (FL): StatPearls; 2018.
17. Letcher P, Smart D, Sanson A, *et al*. Psychosocial precursors and correlates of differing internalizing trajectories from 3 to 15 years 1. *Social Development*. 2009;**18**:618-46
18. Shaw DS, Lacourse E, Nagin DS. Developmental trajectories of conduct problems and hyperactivity from ages 2 to 10. *Journal of Child Psychology and Psychiatry*. 2005;**46**:931-42. <https://doi.org/10.1111/j.1469-7610.2004.00390.x>
19. Patel V, Kieling C, Maulik PK, *et al*. Improving access to care for children with mental disorders: A global perspective. *Arch Dis Child*. 2013;**98**:323-7. <https://doi.org/10.1136/archdischild-2012-3020793672840>
20. Johnston OG, Burke JD. Parental problem recognition and help-seeking for disruptive behavior disorders. *J Behav Health Serv Res*. 2020;**47**:146-63. <https://doi.org/10.1007/s11414-018-09648-y>

1  
2  
3  
4  
5  
6  
7  
8  
9  
10  
11  
12  
13  
14  
15  
16  
17  
18  
19  
20  
21  
22  
23  
24  
25  
26  
27  
28  
29  
30  
31  
32  
33  
34  
35  
36  
37  
38  
39  
40  
41  
42  
43  
44  
45  
46  
47  
48  
49  
50  
51  
52  
53  
54  
55  
56  
57  
58  
59  
60

21. Thompson RA. Emotional regulation and emotional development. *Educ Psychol Rev.* 1991;**3**:269-307. <https://doi.org/10.1007/BF01319934>
22. Zwaanswijk M, van der Ende J, Verhaak PF, *et al.* Help-seeking for child psychopathology: Pathways to informal and professional services in the netherlands. *J Am Acad Child Adolesc Psychiatry.* 2005;**44**:1292-300. <https://doi.org/10.1097/01.chi.0000181038.98712.c6>
23. Oh E, Bayer JK. Parents' help-seeking processes for early childhood mental health problems. *Child and Adolescent Mental Health.* 2015;**20**:149-54. <https://doi.org/10.1111/camh.12081>
24. Girio-Herrera E, Owens JS, Langberg JM. Perceived barriers to help-seeking among parents of at-risk kindergarteners in rural communities. *J Clin Child Adolesc Psychol.* 2013;**42**:68-77. <https://doi.org/10.1080/15374416.2012.715365>
25. Beyer T, Postert C, Müller JM, *et al.* Prognosis and continuity of child mental health problems from preschool to primary school: Results of a four-year longitudinal study. *Child Psychiatry Hum Dev.* 2012;**43**:533-43. <https://doi.org/10.1007/s10578-012-0282-5>
26. Andersen RM. Revisiting the behavioral model and access to medical care: Does it matter? *J Health Soc Behav.* 1995:1-10. <https://doi.org/10.2307/2137284>
27. Murry VM, Heflinger CA, Suiter SV, *et al.* Examining perceptions about mental health care and help-seeking among rural african american families of adolescents. *J Youth Adolesc.* 2011;**40**:1118-31. <https://doi.org/10.1007/s10964-010-9627-1>
28. Thurston IB, Hardin R, Decker K, *et al.* Black and white parents' willingness to seek help for children's internalizing and externalizing symptoms. *J Clin Psychol.* 2017;**74**:161-77. <https://doi.org/10.1002/jclp.22495>
29. Bussing R, Zima BT, Gary FA, *et al.* Barriers to detection, help-seeking, and service use for children with adhd symptoms. *The Journal of Behavioral Health Services & Research.* 2003;**30**:176-89. <https://doi.org/10.1007/BF02289806>
30. Zwaanswijk M, Verhaak PF, Bensing JM, *et al.* Help seeking for emotional and behavioural problems in children and adolescents: A review of recent literature. *Eur Child Adolesc Psychiatry.* 2003;**12**:153-61. <https://doi.org/10.1007/s00787-003-0322-6>
31. Sayal KJJoCP, Psychiatry. Annotation: Pathways to care for children with mental health problems. *J Child Psychol Psychiatry.* 2006;**47**:649-59. <https://doi.org/10.1111/j.1469-7610.2005.01543.x>
32. Morawska A, Sultan A. Parental attitudes towards seeking professional help for their children: A community sample from the sultanate of oman. *Journal of Child and Family Studies.* 2016;**25**:979-87. <https://doi.org/10.1007/s10826-015-0257-9>
33. Alonso J, Little E. Parent help-seeking behaviour: Examining the impact of parent beliefs on professional help-seeking for child emotional and behavioural difficulties. *The Educational and Developmental Psychologist.* 2019;**36**:60-7. <https://doi.org/10.1017/edp.2019.8>
34. Reardon T, Harvey K, Creswell C. Seeking and accessing professional support for child anxiety in a community sample. *Eur Child Adolesc Psychiatry.* 2019;**29**:649-64. <https://doi.org/10.1007/s00787-019-01388-47250799>
35. Iskra W, Deane FP, Wahlin T, *et al.* Parental perceptions of barriers to mental health services for young people. *Early Interv Psychiatry.* 2015;**12**:125-34. <https://doi.org/10.1111/eip.12281>
36. Ryan SM, Jorm AF, Toumbourou JW, *et al.* Parent and family factors associated with service use by young people with mental health problems: A systematic review. *Early Interv Psychiatry.* 2015;**9**:433-46. <https://doi.org/10.1111/eip.12211>
37. Dempster R, Davis DW, Jones VF, *et al.* The role of stigma in parental help-seeking for perceived child behavior problems in urban, low-income african american parents. *J Clin Psychol Med Settings.* 2015;**22**:265-78. <https://doi.org/10.1007/s10880-015-9433-8>
38. Sayal K, Mills J, White K, *et al.* Predictors of and barriers to service use for children at risk of adhd: Longitudinal study. *Eur Child Adolesc Psychiatry.* 2015;**24**:545-52. <https://doi.org/10.1007/s00787-014-0606-z>
39. Reardon T, Harvey K, Baranowska M, *et al.* What do parents perceive are the barriers and facilitators to accessing psychological treatment for mental health problems in children and adolescents?

- 1  
2  
3 567 A systematic review of qualitative and quantitative studies. *Eur Child Adolesc Psychiatry*. 2017;**26**:623-  
4 568 47. <https://doi.org/10.1007/s00787-016-0930-6PMC5446558>
- 5 569 40. Verhulst FC, van der Ende J. Factors associated with child mental health service use in the  
6 570 community. *J Am Acad Child Adolesc Psychiatry*. 1997;**36**:901-9.S0890-8567(09)62545-4 [pii]  
7  
8 571 10.1097/00004583-199707000-00011
- 9 572 41. A.E.M. de Hollander NH, J.M. Melse, J.A.M van Oers,. Care for health: The 2006 dutch public  
10 573 health status and forecasts report. Bilthoven, The Netherlands: The National Institute for Public Health  
11 574 and the Environment; 2007.
- 12 575 42. Oudhof M, MS de Wolff, M. de Ruiter, M. Kamphuis, MP L'Hoir and and B. Prinsen. Jgz richtlijn  
13 576 opvoedingsondersteuning voor hulp bij opvoedingsvragen en lichte opvoedproblemen. Utrecht, the  
14 577 Netherlands: Nederland Centrum Jeugdgezondheid (NCJ); 2013.
- 15 578 43. Annual report on integration 2018. The Hague, the Netherlands: Statistics Netherlands; 2018.
- 16 579 44. Standaard onderwijsindeling 2016. Den Haag, the Netherlands: Statistics Netherlands, 2018.
- 18 580 45. Briggs-Gowan MJ, Carter AS. Social-emotional screening status in early childhood predicts  
19 581 elementary school outcomes. *Pediatrics*. 2008;**121**:957-62. [https://doi.org/10.1542/peds.2007-  
20 582 19483088107](https://doi.org/10.1542/peds.2007-19483088107)
- 21 583 46. Kruizinga I, Jansen W, De Haan CL, *et al*. Reliability and validity of the dutch version of the bitsea.  
22 584 *PLoS One*. 2012;**7**:e38762. <https://doi.org/10.1371/journal.pone.00387623371000>
- 23 585 47. Kruizinga I, Jansen W, De Haan CL, *et al*. Reliability and validity of the dutch version of the bitsea.  
24 586 2012;**7**
- 25 587 48. Landgraf JM, Vogel I, Oostenbrink R, *et al*. Parent-reported health outcomes in infants/toddlers:  
26 588 Measurement properties and clinical validity of the itqol-sf47. *Qual Life Res*. 2013;**22**:635-  
27 589 46. <https://doi.org/10.1007/s11136-012-0177-8>
- 28 590 49. Raat H, Landgraf JM, Oostenbrink R, *et al*. Reliability and validity of the infant and toddler quality  
29 591 of life questionnaire (itqol) in a general population and respiratory disease sample. *Qual Life Res*.  
30 592 2007;**16**:445-60. <https://doi.org/10.1007/s11136-006-9134-82792359>
- 31 593 50. Raat H, Landgraf JM, Oostenbrink R, *et al*. Reliability and validity of the infant and toddler quality  
32 594 of life questionnaire (itqol) in a general population and respiratory disease sample. *Quality of Life  
33 595 Research*. 2007;**16**:445-60
- 34 596 51. Maroof DA. Binary logistic regression. In: Maroof DA, editor. Statistical methods in  
35 597 neuropsychology: Common procedures made comprehensible. Boston, MA: Springer US; 2012. p. 67-  
36 598 75.
- 38 599 52. Liu Y, De A. Multiple imputation by fully conditional specification for dealing with missing data in  
39 600 a large epidemiologic study. *International journal of statistics in medical research*.  
40 601 2015;**4**:287. <https://doi.org/10.6000/1929-6029.2015.04.03.74945131>
- 41 602 53. Zhou X-H, Eckert GJ, Tierney WM. Multiple imputation in public health research. *Stat Med*.  
42 603 2001;**20**:1541-9. <https://doi.org/10.1002/sim.689>
- 43 604 54. Greenland S. Multiple - bias modelling for analysis of observational data. *Journal of the Royal  
44 605 Statistical Society: Series A (Statistics in Society)*. 2005;**168**:267-306
- 45 606 55. Andersen R, Newman JF. Societal and individual determinants of medical care utilization in the  
46 607 united states. *The Milbank Memorial Fund Quarterly Health and Society*. 1973;**51**:95-  
47 608 124.10.2307/3349613
- 48 609 56. Alegría M, Canino G, Lai S, *et al*. Understanding caregivers' help-seeking for latino children's  
49 610 mental health care use. *Med Care*. 2004;**42**:447-55. <https://doi.org/10.1097/01.mlr.0000124248.64190.56>
- 50 611 57. Verhulst EE, Stevens GWJM, van de Schoot R, *et al*. Understanding ethnic differences in mental  
51 612 health service use for adolescents' internalizing problems: The role of emotional problem identification.  
52 613 *Eur Child Adolesc Psychiatry*. 2013;**22**:413-21. <https://doi.org/10.1007/s00787-013-0380-3>
- 53 614 58. Shanley DC, Reid GJ, Evans B. How parents seek help for children with mental health problems.  
54 615 *Administration and Policy in Mental Health and Mental Health Services Research*. 2008;**35**:135-  
55 616 46. <https://doi.org/10.1007/s10488-006-0107-6>



1  
2  
3  
4  
5  
6  
7  
8  
9  
10  
11  
12  
13  
14  
15  
16  
17  
18  
19  
20  
21  
22  
23  
24  
25  
26  
27  
28  
29  
30  
31  
32  
33  
34  
35  
36  
37  
38  
39  
40  
41  
42  
43  
44  
45  
46  
47  
48  
49  
50  
51  
52  
53  
54  
55  
56  
57  
58  
59  
60

59. Giallo R, Dunning M, Gent A. Attitudinal barriers to help-seeking and preferences for mental health support among australian fathers. *J Reprod Infant Psychol.* 2017;**35**:236-47.<https://doi.org/10.1080/02646838.2017.1298084>
60. Zimmerman FJ. Social and economic determinants of disparities in professional help - seeking for child mental health problems: Evidence from a national sample. *Health Serv Res.* 2005;**40**:1514-33.<https://doi.org/10.1111/j.1475-6773.2005.00411.x1361199>
61. Kroneman M, Boerma W, van den Berg M, *et al.* The netherlands: Health system review. *Health Syst Transit.* 2016;**18**:1-240
62. van Weel C, Schers H, Timmermans A. Health care in the netherlands. *The Journal of the American Board of Family Medicine.* 2012;**25**:S12-S7.<https://doi.org/10.3122/jabfm.2012.02.110212>
63. Verbrugge HPJP. Youth health care in the netherlands: A bird's eye view. 1990;**86**:1044-7
64. Goldfeld SR, Wright M, Oberklaid F. Parents, infants and health care: Utilization of health services in the first 12months of life. *J Paediatr Child Health.* 2003;**39**:249-53.<https://doi.org/10.1046/j.1440-1754.2003.00146.x>
65. Hanna BA, Edgecombe G, Jackson CA, *et al.* The importance of first-time parent groups for new parents. *Nurs Health Sci.* 2002;**4**:209-14.<https://doi.org/10.1046/j.1442-2018.2002.00128.x>
66. Zahner GE, Daskalakis C. Factors associated with mental health, general health, and school-based service use for child psychopathology. *Am J Public Health.* 1997;**87**:1440-8.<https://doi.org/10.2105/ajph.87.9.1440>
67. Sawyer MG, Miller-Lewis LR, Clark JJ. The mental health of 13–17 year-olds in australia: Findings from the national survey of mental health and well-being. *J Youth Adolesc.* 2007;**36**:185-94.<https://doi.org/10.1007/s10964-006-9122-x>
68. Turner EA, Mohan S. Child mental health services and psychotherapy attitudes among asian indian parents: An exploratory study. *Community Ment Health J.* 2016;**52**:989-97.<https://doi.org/10.1007/s10597-015-9976-z>
69. Costello EJ, Mustillo S, Erkanli A, *et al.* Prevalence and development of psychiatric disorders in childhood and adolescence. *Arch Gen Psychiatry.* 2003;**60**:837-44.<https://doi.org/10.1001/archpsyc.60.8.837>
70. Alexander KE, Brijnath B, Mazza D. 'Can they really identify mental health problems at the age of three?' parent and practitioner views about screening young children's social and emotional development. *Aust N Z J Psychiatry.* 2013;**47**:538-45.<https://doi.org/10.1177/0004867413476756>
71. Woolfenden S, Eapen V, Williams K, *et al.* A systematic review of the prevalence of parental concerns measured by the parents' evaluation of developmental status (peds)indicating developmental risk. *BMC Pediatr.* 2014;**14**:231.10.1186/1471-2431-14-231
72. Coker TR, Shaikh Y, Chung PJ. Parent-reported quality of preventive care for children at-risk for developmental delay. *Acad Pediatr.* 2012;**12**:384-90.<https://doi.org/10.1016/j.acap.2012.05.003>
73. Raviv A, Sharvit K, Raviv A, *et al.* Mothers' and fathers' reluctance to seek psychological help for their children. *Journal of Child and Family Studies.* 2009;**18**:151.<https://doi.org/10.1007/s10826-008-9215-0>
74. Mitchell RE, Trickett EJ. Task force report: Social networks as mediators of social support. *Community Ment Health J.* 1980;**16**:27-44.<https://doi.org/10.1007/BF00780665>
75. Karim N, Boyle B, Lohan M, *et al.* Immigrant parents' experiences of accessing child healthcare services in a host country: A qualitative thematic synthesis. *J Adv Nurs.* 2020.<https://doi.org/10.1111/jan.14358>
76. Coughlin SS. Recall bias in epidemiologic studies. *J Clin Epidemiol.* 1990;**43**:87-91.[https://doi.org/10.1016/0895-4356\(90\)90060-3](https://doi.org/10.1016/0895-4356(90)90060-3)
77. Nohr EA, Frydenberg M, Henriksen TB, *et al.* Does low participation in cohort studies induce bias? *Epidemiology.* 2006:413-8
78. Elemraid M, Pollard K, Thomas M, *et al.* Parental decisions on children participating in research. *Nurs Child Young People.* 2013;**25**:16-21

1  
2  
3  
4  
5  
6  
7  
8  
9  
10  
11  
12  
13  
14  
15  
16  
17  
18  
19  
20  
21  
22  
23  
24  
25  
26  
27  
28  
29  
30  
31  
32  
33  
34  
35  
36  
37  
38  
39  
40  
41  
42  
43  
44  
45  
46  
47  
48  
49  
50  
51  
52  
53  
54  
55  
56  
57  
58  
59  
60

667 79. Levickis P, Naughton G, Gerner B, *et al.* Why families choose not to participate in research:  
668 Feedback from non-responders. *J Paediatr Child Health.* 2013;**49**:57-62

For peer review only

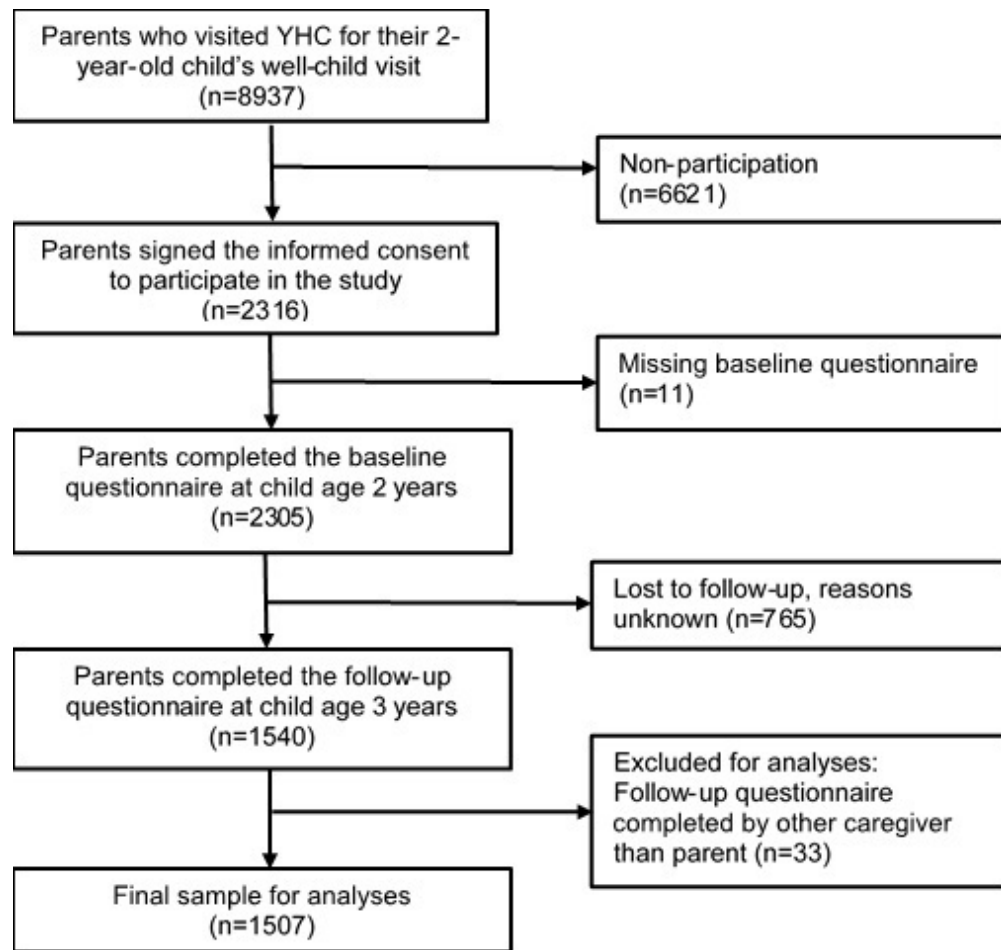

Figure 1. Population of Analysis

42x46mm (300 x 300 DPI)

1  
2  
3  
4 **Supplementary Materials [Tables]**  
5  
6  
7

8 **Title:** Correlates of help-seeking by parents for the socio-emotional development of their 3-year-old  
9 children: a longitudinal study.  
10  
11

12  
13 **Journal:** BMJ Open  
14

15  
16 **Authors:** Jie Luo, Hein Raat, Carmen B. Franse, Rienke Bannink, Guannan Bai, Amy van Grieken  
17

18 **Corresponding Author:** Amy van Grieken, PhD, Department of Public Health, Erasmus University  
19 Medical Center, P.O. Box 2040, 3000 CA Rotterdam, The Netherlands, a.vangrieken@erasmusmc.nl.  
20  
21  
22  
23  
24  
25  
26  
27  
28  
29  
30  
31  
32  
33  
34  
35  
36  
37  
38  
39  
40  
41  
42  
43  
44  
45  
46  
47  
48  
49  
50  
51  
52  
53  
54  
55  
56  
57  
58  
59  
60

Supplementary Table S1. *P*-values for interactions between the 13 factors and child gender, child ethnic background, parental age and parental education level on help-seeking (n=1507)

|                                                                          | Child gender   | Child ethnic background | Parental age   | Parental education level |
|--------------------------------------------------------------------------|----------------|-------------------------|----------------|--------------------------|
|                                                                          | <i>p</i> value | <i>p</i> value          | <i>p</i> value | <i>p</i> value           |
| Child gender                                                             | -              | 0.877                   | 0.537          | 0.751                    |
| Child ethnic background                                                  | 0.877          | -                       | 0.049          | 0.981                    |
| Parental age                                                             | 0.537          | 0.049                   | -              | 0.829                    |
| Parental education level                                                 | 0.751          | 0.981                   | 0.829          | -                        |
| Parental work status                                                     | 0.325          | 0.909                   | 0.841          | 0.069                    |
| Family composition                                                       | 0.226          | 0.078                   | 0.887          | 0.194                    |
| BITSEA Problem scale score                                               | 0.419          | 0.373                   | 0.074          | 0.969                    |
| BITSEA Competence scale score                                            | 0.414          | 0.853                   | 0.406          | 0.100                    |
| Stressful life events                                                    | 0.003          | 0.518                   | 0.786          | 0.033                    |
| General health of the child                                              | 0.893          | 0.171                   | 0.442          | 0.271                    |
| Parental satisfaction of child's development                             | 0.446          | 0.307                   | 0.350          | 0.347                    |
| Previous help-seeking behavior                                           | 0.274          | 0.619                   | 0.159          | 0.567                    |
| Discussion of child social-emotional development in the well-child visit | 0.552          | 0.193                   | 0.126          | 0.731                    |

Note: numbers in table are *p*-values of interaction of the variables in rows and columns.

Abbreviations: BITSEA= Brief Infant–Toddler Social and Emotional Assessment.

Multivariate logistic regression was adopted for interaction analyses in the full model with predisposing variables, enabling variables and need variables as independent variables. After applying Bonferroni correction for multiple testing ( $P=0.05/42=0.001$ ), no statistically significant interaction was found.

Supplementary Table S2. Non-response analyses (n = 2305)

|                          | Total<br>(n=2305)<br>Mean ± SD N(%) | Response to follow-up              |                                      | p value |
|--------------------------|-------------------------------------|------------------------------------|--------------------------------------|---------|
|                          |                                     | No<br>(n=765)<br>Mean ± SD<br>N(%) | Yes<br>(n=1540)<br>Mean ± SD<br>N(%) |         |
| Child age in months      | 24.6±1.8                            | 24.8±1.6                           | 24.5±1.8                             | <0.001  |
| Child gender             |                                     |                                    |                                      | 0.155   |
| Boy                      | 1159 (50.6)                         | 401 (52.7)                         | 758 (49.5)                           |         |
| Girl                     | 1132 (49.4)                         | 360 (47.3)                         | 772 (50.5)                           |         |
| Child ethnic background  |                                     |                                    |                                      | <0.001  |
| Dutch                    | 1576 (73.3)                         | 415 (58.9)                         | 1161 (80.2)                          |         |
| Other western            | 166 (7.7)                           | 59 (8.4)                           | 107 (7.4)                            |         |
| Non-western              | 409 (19.0)                          | 230 (32.7)                         | 179 (12.4)                           |         |
| Parental age in year     |                                     |                                    |                                      | <0.001  |
| ≥40                      | 262 (22.6)                          | 89 (11.8)                          | 173 (11.3)                           |         |
| 30-39                    | 1500 (65.9)                         | 438 (58.2)                         | 1062 (69.6)                          |         |
| ≤<29                     | 515 (11.5)                          | 225 (29.9)                         | 290 (19.0)                           |         |
| Parental education level |                                     |                                    |                                      | <0.001  |
| High                     | 1175 (52.8)                         | 282 (39.1)                         | 893 (59.5)                           |         |
| Middle                   | 858 (38.6)                          | 345 (47.8)                         | 513 (34.2)                           |         |
| Low                      | 191 (8.6)                           | 95 (13.2)                          | 96 (6.4)                             |         |

Note: This table present non-imputed data. The missing numbers of variables are child age (n=32), child gender (n=16), child ethnic background (n=165), parental age (n=39), parental educational level (n=92).

Abbreviation: SD=standard deviation.

P values are based on Independent t-test and chi-square test for non-response to follow-up and response groups.

Supplementary Table S3. McNemar's test for homogeneity of formal sources use and informal sources use

(n=341)

|                           | Informal sources use |              | p value |
|---------------------------|----------------------|--------------|---------|
|                           | Yes<br>(n=264)       | No<br>(n=77) |         |
| <b>Formal sources use</b> |                      |              |         |
| Yes (n=103)               | 26                   | 77           | <0.001  |
| No (n=238)                | 238                  | 0            |         |

P value is based on the McNemar's test.

Supplementary Table S4. Characteristics of the study population by use of formal and informal sources in parental help-seeking (n=1507)

|                               | Total<br>(n=1507)<br>Mean ± SD<br>N(%) | Use of formal sources               |                                     | p value | Use of Informal sources             |                                     | p value |
|-------------------------------|----------------------------------------|-------------------------------------|-------------------------------------|---------|-------------------------------------|-------------------------------------|---------|
|                               |                                        | No<br>(n=1404)<br>Mean ± SD<br>N(%) | Yes<br>(n=103)<br>Mean ± SD<br>N(%) |         | No<br>(n=1243)<br>Mean ± SD<br>N(%) | Yes<br>(n=264)<br>Mean ± SD<br>N(%) |         |
| <b>Predisposing Factors</b>   |                                        |                                     |                                     |         |                                     |                                     |         |
| Child age in month            | 24.5±1.8                               | 24.5±1.9                            | 24.5±1.6                            | 0.920   | 24.5±1.8                            | 24.5±2.0                            | 0.593   |
| Child gender                  |                                        |                                     |                                     | 0.029   |                                     |                                     | 0.648   |
| Boys                          | 739 (49.4)                             | 678 (48.6)                          | 61 (59.8)                           |         | 614 (49.6)                          | 125 (48.1)                          |         |
| Girls                         | 758 (50.6)                             | 717 (51.4)                          | 41 (40.2)                           |         | 623 (50.4)                          | 135 (51.9)                          |         |
| Child ethnic background       |                                        |                                     |                                     | 0.020   |                                     |                                     | 0.508   |
| Dutch                         | 1161 (80.2)                            | 1093 (81.0)                         | 68 (69.4)                           |         | 966 (80.8)                          | 195 (77.7)                          |         |
| Other western                 | 107 (7.4)                              | 96 (7.1)                            | 11 (11.2)                           |         | 85 (7.1)                            | 22 (8.8)                            |         |
| Non-western                   | 179 (12.4)                             | 160 (11.9)                          | 19 (19.4)                           |         | 145 (12.1)                          | 34 (13.5)                           |         |
| Parental age in year          |                                        |                                     |                                     | 0.285   |                                     |                                     | 0.001   |
| ≥40                           | 166 (11.1)                             | 155 (11.1)                          | 11 (10.9)                           |         | 149 (12.1)                          | 17 (6.5)                            |         |
| 30-39                         | 1048 (70.1)                            | 983 (70.5)                          | 65 (64.4)                           |         | 870 (70.6)                          | 178 (67.7)                          |         |
| =<29                          | 282 (18.9)                             | 257 (18.4)                          | 25 (24.8)                           |         | 214 (17.4)                          | 68 (25.9)                           |         |
| <b>Enabling Factors</b>       |                                        |                                     |                                     |         |                                     |                                     |         |
| Parental education level      |                                        |                                     |                                     | 0.001   |                                     |                                     | 0.170   |
| High                          | 883 (59.9)                             | 841 (61.1)                          | 42 (43.3)                           |         | 740 (61.1)                          | 143 (54.8)                          |         |
| Middle                        | 498 (33.8)                             | 449 (32.6)                          | 49 (50.5)                           |         | 399 (32.9)                          | 99 (37.9)                           |         |
| Low                           | 92 (6.2)                               | 86 (6.3)                            | 6 (6.2)                             |         | 73 (6.0)                            | 19 (7.3)                            |         |
| Parental work status          |                                        |                                     |                                     | 0.006   |                                     |                                     | 0.015   |
| Employed                      | 1213(81.2)                             | 1125 (82.5)                         | 70 (71.4)                           |         | 996 (82.9)                          | 199 (76.5)                          |         |
| Unemployed                    | 280 (18.8)                             | 238 (17.5)                          | 28 (28.6)                           |         | 205 (17.1)                          | 61 (23.5)                           |         |
| Family composition            |                                        |                                     |                                     | 0.210   |                                     |                                     | 0.054   |
| Two-parent family             | 1386 (93.8)                            | 1297 (94.0)                         | 89 (90.8)                           |         | 1149 (94.3 )                        | 237 (91.2)                          |         |
| Single-parent family          | 92 (6.2)                               | 83 (6.0)                            | 9 (9.2)                             |         | 69 (5.7)                            | 23 (8.8)                            |         |
| <b>Need Factors</b>           |                                        |                                     |                                     |         |                                     |                                     |         |
| BITSEA Problem scale score    |                                        |                                     |                                     | <0.001  |                                     |                                     | 0.021   |
| No risk                       | 1400 (94.0)                            | 1319 (95.0)                         | 81 (80.2)                           |         | 1161 (94.6)                         | 239 (90.9)                          |         |
| At risk                       | 92 (6.0)                               | 70 (5.0)                            | 20 (19.8)                           |         | 66 (5.4)                            | 24 (9.1)                            |         |
| BITSEA Competence scale score |                                        |                                     |                                     | 0.001   |                                     |                                     | 0.352   |
| No risk                       | 1300 (88.0)                            | 1222 (88.7)                         | 78 (77.2)                           |         | 1074 (88.3)                         | 226 (86.3)                          |         |
| At risk                       | 178 (12.0)                             | 155(11.3)                           | 23(22.8)                            |         | 142 (11.7)                          | 36 (13.7)                           |         |

|                                                                         |             |             |           |        |             |            |        |
|-------------------------------------------------------------------------|-------------|-------------|-----------|--------|-------------|------------|--------|
| Stressful life events                                                   |             |             |           | 0.048  |             |            | 0.001  |
| No                                                                      | 749 (51.0)  | 708 (51.7)  | 41 (41.4) |        | 641 (53.0)  | 108 (41.7) |        |
| Yes                                                                     | 720 (49.0)  | 662 (48.3)  | 58 (58.6) |        | 569 (47.0)  | 151 (58.3) |        |
| General health of the child <sup>a</sup>                                |             |             |           | 0.007  |             |            | 0.153  |
| Good                                                                    | 1370 (92.2) | 1283(92.7)  | 87 (85.3) |        | 1135 (92.7) | 235 (90.0) |        |
| Poor                                                                    | 116 (7.8)   | 101 (7.3)   | 15 (14.7) |        | 90 (7.3)    | 26 (10.0)  |        |
| Parental satisfaction of child's development <sup>b</sup>               |             |             |           | <0.001 |             |            | 0.366  |
| Yes                                                                     | 1380 (94.7) | 1297(95.6)  | 83 (81.4) |        | 1135 (94.9) | 245 (93.5) |        |
| No                                                                      | 78 (5.3)    | 59(4.4)     | 19 (18.6) |        | 61 (5.1)    | 17 (6.5)   |        |
| Previous help-seeking                                                   |             |             |           | <0.001 |             |            | <0.001 |
| No                                                                      | 1208 (82.2) | 1151 (83.9) | 57 (58.8) |        | 1039 (85.8) | 169 (65.5) |        |
| Yes                                                                     | 261 (17.8)  | 221 (16.1)  | 40 (41.2) |        | 172 (14.2)  | 89 (34.5)  |        |
| Discussion of child socio-emotional development in the well-child visit |             |             |           | <0.001 |             |            | <0.001 |
| No                                                                      | 1196 (85.6) | 1148 (88.0) | 48 (52.2) |        | 1017 (87.6) | 179 (75.8) |        |
| Yes                                                                     | 201 (14.4)  | 157 (12.0)  | 44 (47.8) |        | 144 (12.4)  | 57 (24.2)  |        |

Note: This table presents non-imputed data. The missing numbers of variables are parental age (n=11), child gender (n=10), child ethnic background (n=60), parental educational level (n=34), parental work status (n=46), family composition (n=29), BITSEA Problem scale score (n=17), BITSEA Competence scale score (n=29), stressful life events (n=38), general health of the child (n=21), parental satisfaction of child's development (n=49), previous help-seeking (n=38), and discussion of child socio-emotional development in the well-child visit (n=110).

Data presented as mean  $\pm$  SD or number (percentage). Significant differences between two subgroups of help-seeking and non-help-seeking parents were evaluated at 0.05 level using independent T tests for continuous variables and  $\chi^2$  tests for categorical variables.

a. General health of the child was measured by the 4-item subscale General Health of the Infant Toddler Quality of Life Questionnaire (47 items).

b. Parental satisfaction of child's development was measured by the 5-item subscale Satisfaction of Child's Development of the Infant Toddler Quality of Life Questionnaire (47 items).

Abbreviation: SD=standard deviation; BITSEA= Brief Infant-Toddler Social and Emotional Assessment.

The bold print indicates  $p < 0.05$ .



Supplementary Table S5. Multivariate logistic regression model on independent factors and help-seeking with complete data (n=1168)

|                               | <b>Model 1</b>         |           | <b>Model 2</b>          |           | <b>Model 3</b>      |           |
|-------------------------------|------------------------|-----------|-------------------------|-----------|---------------------|-----------|
|                               | Predisposing variables |           | Plus enabling variables |           | Plus need variables |           |
|                               | $\chi^2 = 22.08$       |           | $\chi^2 = 14.11$        |           | $\chi^2 = 93.56$    |           |
|                               | OR                     | 95% CI    | OR                      | 95% CI    | OR                  | 95% CI    |
| <b>Predisposing Factors</b>   |                        |           |                         |           |                     |           |
| Child gender                  |                        |           |                         |           |                     |           |
| Boy                           | Ref                    |           | Ref                     |           | Ref                 |           |
| Girl                          | 0.86                   | 0.65-1.14 | 0.86                    | 0.65-1.14 | 0.93                | 0.69-1.25 |
| Child ethnic background       |                        |           |                         |           |                     |           |
| Dutch                         | Ref                    |           | Ref                     |           | Ref                 |           |
| Other western                 | 1.51                   | 0.90-2.54 | 1.45                    | 0.86-2.44 | 1.51                | 0.87-2.63 |
| Non-western                   | 1.52                   | 1.00-2.33 | 1.21                    | 0.77-1.90 | 1.18                | 0.72-1.91 |
| Parental age in year          |                        |           |                         |           |                     |           |
| >=40                          | Ref                    |           | Ref                     |           | Ref                 |           |
| 30-39                         | 1.67                   | 0.97-2.88 | 1.72                    | 0.99-2.96 | 1.51                | 0.86-2.65 |
| =<29                          | 2.87***                | 1.59-5.18 | 2.53**                  | 1.39-4.59 | 2.23*               | 1.20-4.15 |
| <b>Enabling Factors</b>       |                        |           |                         |           |                     |           |
| Parental education level      |                        |           |                         |           |                     |           |
| High                          |                        |           | Ref                     |           | Ref                 |           |
| Middle                        |                        |           | 1.27                    | 0.93-1.73 | 1.24                | 0.89-1.71 |
| Low                           |                        |           | 1.00                    | 0.52-1.94 | 0.93                | 0.46-1.87 |
| Parental work status          |                        |           |                         |           |                     |           |
| Employed                      |                        |           | Ref                     |           | Ref                 |           |
| Unemployed                    |                        |           | 1.59*                   | 1.11-2.27 | 1.32                | 0.90-1.95 |
| Family composition            |                        |           |                         |           |                     |           |
| Two-parent family             |                        |           | Ref                     |           | Ref                 |           |
| Single-parent family          |                        |           | 1.66                    | 0.91-3.03 | 1.46                | 0.77-2.75 |
| <b>Need Factors</b>           |                        |           |                         |           |                     |           |
| BITSEA Problem scale score    |                        |           |                         |           |                     |           |
| No risk                       |                        |           |                         |           | Ref                 |           |
| At risk                       |                        |           |                         |           | 0.96                | 0.51-1.81 |
| BITSEA Competence scale score |                        |           |                         |           |                     |           |
| No risk                       |                        |           |                         |           | Ref                 |           |
| At risk                       |                        |           |                         |           | 1.35                | 0.85-2.14 |

1  
2  
3  
4  
5  
6  
7  
8  
9  
10  
11  
12  
13  
14  
15  
16  
17  
18  
19  
20  
21  
22  
23  
24  
25  
26  
27  
28  
29  
30  
31  
32  
33  
34  
35  
36  
37  
38  
39  
40  
41  
42  
43  
44  
45  
46  
47  
48  
49  
50  
51  
52  
53  
54  
55  
56  
57  
58  
59  
60

|                                                                              |  |         |           |
|------------------------------------------------------------------------------|--|---------|-----------|
| Stressful life events                                                        |  |         |           |
| No                                                                           |  | Ref     |           |
| Yes                                                                          |  | 1.45*   | 1.07-1.96 |
| General health of the child <sup>a</sup>                                     |  |         |           |
| Good                                                                         |  | Ref     |           |
| Poor                                                                         |  | 1.25    | 0.73-2.14 |
| Parental satisfaction of child's development <sup>b</sup>                    |  |         |           |
| Yes                                                                          |  | Ref     |           |
| No                                                                           |  | 1.58    | 0.81-3.09 |
| Previous help-seeking                                                        |  |         |           |
| No                                                                           |  | Ref     |           |
| Yes                                                                          |  | 2.71*** | 1.90-3.88 |
| Discussion of child social and emotional development in the well-child visit |  |         |           |
| No                                                                           |  | Ref     |           |
| Yes                                                                          |  | 2.67*** | 1.82-3.92 |

Model 1: The model with predisposing factors as independent variables.

Model 2: The model with predisposing and enabling factors as independent variables.

Model 3: The full model with predisposing, enabling, and need factors as independent variables.

a. General health of the child was measured by the 4-item subscale General Health of the Infant Toddler Quality of Life Questionnaire (47 items).

b. Parental satisfaction of child's development was measured by the 5-item subscale Satisfaction of Child's Development of the Infant Toddler Quality of Life Questionnaire (47 items).

Abbreviation: OR=Odds Ratio; CI=Confidence Interval; BITSEA= Brief Infant-Toddler Social and Emotional Assessment.

\*  $p < 0.05$ ; \*\*  $p < 0.01$ ; \*\*\*  $p < 0.001$ .

Supplementary Table S6. Chi-square test for homogeneity of complete data and imputed data

|                                          | Complete data<br>(n=1168)<br>N(%) | Imputed data<br>(n=1507)<br>N(%) | p value |
|------------------------------------------|-----------------------------------|----------------------------------|---------|
| <b><i>Predisposing Factors</i></b>       |                                   |                                  |         |
| Child gender                             |                                   |                                  |         |
| Boy                                      | 569 (48.7)                        | 744 (49.4)                       | 0.737   |
| Girl                                     | 599 (51.3)                        | 763 (50.6)                       |         |
| Child ethnic background                  |                                   |                                  |         |
| Dutch                                    | 959 (82.1)                        | 1202(79.8)                       | 0.260   |
| Other western                            | 83 (7.1)                          | 113 (7.5)                        |         |
| Non-western                              | 126 (10.8)                        | 192 (12.7)                       |         |
| Parental age in year                     |                                   |                                  |         |
| >=40                                     | 123 (10.5)                        | 167 (11.1)                       | 0.899   |
| 30-39                                    | 825 (70.6)                        | 1056 (70.1)                      |         |
| =<29                                     | 220 (18.8)                        | 284 (18.8)                       |         |
| <b><i>Enabling Factors</i></b>           |                                   |                                  |         |
| Parental education level                 |                                   |                                  |         |
| High                                     | 717 (61.4)                        | 901 (59.8)                       | 0.394   |
| Middle                                   | 391 (33.5)                        | 511 (33.9)                       |         |
| Low                                      | 60 (5.1)                          | 95 (6.3)                         |         |
| Parental work status                     |                                   |                                  |         |
| Employed                                 | 958 (82.0)                        | 1227 (81.4)                      | 0.690   |
| Unemployed                               | 210 (18.0)                        | 280 (18.6)                       |         |
| Family composition                       |                                   |                                  |         |
| Two-parent family                        | 1111 (95.1)                       | 1407 (93.4)                      | 0.055   |
| Single-parent family                     | 57 (4.9)                          | 100 (6.6)                        |         |
| <b><i>Need Factors</i></b>               |                                   |                                  |         |
| BITSEA Problem scale score               |                                   |                                  |         |
| No risk                                  | 1103 (94.4)                       | 1411 (93.6)                      | 0.385   |
| At risk                                  | 65 (5.6)                          | 96 (6.4)                         |         |
| BITSEA Competence scale score            |                                   |                                  |         |
| No risk                                  | 1045 (89.5)                       | 1318 (87.5)                      | 0.108   |
| At risk                                  | 123 (10.5)                        | 189 (12.5)                       |         |
| Stressful life events                    |                                   |                                  |         |
| No                                       | 606 (51.9)                        | 769 (51.0)                       | 0.661   |
| Yes                                      | 562(48.1)                         | 738 (49.0)                       |         |
| General health of the child <sup>a</sup> |                                   |                                  |         |
| Good                                     | 1081 (92.6)                       | 1390 (92.2)                      | 0.761   |

|    |                                          |             |             |       |
|----|------------------------------------------|-------------|-------------|-------|
| 1  |                                          |             |             |       |
| 2  |                                          |             |             |       |
| 3  | Poor                                     | 87 (7.4)    | 117 (7.8)   |       |
| 4  | Parental satisfaction of child's         |             |             |       |
| 5  | development <sup>b</sup>                 |             |             |       |
| 6  | Yes                                      | 1112 (95.2) | 1428 (94.6) | 0.453 |
| 7  | No                                       | 56 (4.8)    | 82 (5.4)    |       |
| 8  | Previous help-seeking                    |             |             |       |
| 9  | No                                       | 971 (83.1)  | 1236 (82.0) | 0.451 |
| 10 | Yes                                      | 197 (16.9)  | 271 (18.0)  |       |
| 11 | Discussion of child social and emotional |             |             |       |
| 12 | development in the well-child visit      |             |             |       |
| 13 | No                                       | 1010 (86.5) | 1287 (85.4) | 0.430 |
| 14 | Yes                                      | 158 (13.5)  | 220 (14.6)  |       |

15 a. General health of the child was measured by the 4-item subscale General Health of the Infant Toddler Quality of Life  
16 Questionnaire (47 items).

17 b. Parental satisfaction of child's development was measured by the 5-item subscale Satisfaction of Child's Development of  
18 the Infant Toddler Quality of Life Questionnaire (47 items).

19 Abbreviation: BITSEA= Brief Infant-Toddler Social and Emotional Assessment.

20 P values are based on the independent chi-square test for complete data and imputed data groups.

STROBE Statement—Checklist of items that should be included in reports of *cohort studies*

|                              | Item No | Recommendation                                                                                                                                                                                    | Page No |
|------------------------------|---------|---------------------------------------------------------------------------------------------------------------------------------------------------------------------------------------------------|---------|
| <b>Title and abstract</b>    | 1       | (a) Indicate the study's design with a commonly used term in the title or the abstract                                                                                                            | 1       |
|                              |         | (b) Provide in the abstract an informative and balanced summary of what was done and what was found                                                                                               | 2       |
| <b>Introduction</b>          |         |                                                                                                                                                                                                   |         |
| Background/rationale         | 2       | Explain the scientific background and rationale for the investigation being reported                                                                                                              | 3,4     |
| Objectives                   | 3       | State specific objectives, including any prespecified hypotheses                                                                                                                                  | 4       |
| <b>Methods</b>               |         |                                                                                                                                                                                                   |         |
| Study design                 | 4       | Present key elements of study design early in the paper                                                                                                                                           | 4       |
| Setting                      | 5       | Describe the setting, locations, and relevant dates, including periods of recruitment, exposure, follow-up, and data collection                                                                   | 4,5     |
| Participants                 | 6       | (a) Give the eligibility criteria, and the sources and methods of selection of participants. Describe methods of follow-up                                                                        | 5       |
|                              |         | (b) For matched studies, give matching criteria and number of exposed and unexposed                                                                                                               | -       |
| Variables                    | 7       | Clearly define all outcomes, exposures, predictors, potential confounders, and effect modifiers. Give diagnostic criteria, if applicable                                                          | 5,6,7   |
| Data sources/<br>measurement | 8*      | For each variable of interest, give sources of data and details of methods of assessment (measurement). Describe comparability of assessment methods if there is more than one group              | -       |
| Bias                         | 9       | Describe any efforts to address potential sources of bias                                                                                                                                         | -       |
| Study size                   | 10      | Explain how the study size was arrived at                                                                                                                                                         | -       |
| Quantitative variables       | 11      | Explain how quantitative variables were handled in the analyses. If applicable, describe which groupings were chosen and why                                                                      | -       |
| Statistical methods          | 12      | (a) Describe all statistical methods, including those used to control for confounding                                                                                                             | 8       |
|                              |         | (b) Describe any methods used to examine subgroups and interactions                                                                                                                               | 8       |
|                              |         | (c) Explain how missing data were addressed                                                                                                                                                       | 8       |
|                              |         | (d) If applicable, explain how loss to follow-up was addressed                                                                                                                                    | -       |
|                              |         | (e) Describe any sensitivity analyses                                                                                                                                                             | 8       |
| <b>Results</b>               |         |                                                                                                                                                                                                   |         |
| Participants                 | 13*     | (a) Report numbers of individuals at each stage of study—eg numbers potentially eligible, examined for eligibility, confirmed eligible, included in the study, completing follow-up, and analysed | 5       |
|                              |         | (b) Give reasons for non-participation at each stage                                                                                                                                              | 5       |
|                              |         | (c) Consider use of a flow diagram                                                                                                                                                                | Figur2  |
| Descriptive data             | 14*     | (a) Give characteristics of study participants (eg demographic, clinical, social) and information on exposures and potential confounders                                                          | 9       |
|                              |         | (b) Indicate number of participants with missing data for each variable of interest                                                                                                               | 10      |
|                              |         | (c) Summarise follow-up time (eg, average and total amount)                                                                                                                                       | -       |
| Outcome data                 | 15*     | Report numbers of outcome events or summary measures over time                                                                                                                                    | 9       |

|    |                          |    |                                                                                                                                                                                                              |       |
|----|--------------------------|----|--------------------------------------------------------------------------------------------------------------------------------------------------------------------------------------------------------------|-------|
| 1  | Main results             | 16 | (a) Give unadjusted estimates and, if applicable, confounder-adjusted estimates and their precision (eg, 95% confidence interval). Make clear which confounders were adjusted for and why they were included | 12,13 |
| 2  |                          |    | (b) Report category boundaries when continuous variables were categorized                                                                                                                                    | -     |
| 3  |                          |    | (c) If relevant, consider translating estimates of relative risk into absolute risk for a meaningful time period                                                                                             | -     |
| 4  |                          |    |                                                                                                                                                                                                              |       |
| 5  |                          |    |                                                                                                                                                                                                              |       |
| 6  |                          |    |                                                                                                                                                                                                              |       |
| 7  |                          |    |                                                                                                                                                                                                              |       |
| 8  |                          |    |                                                                                                                                                                                                              |       |
| 9  | Other analyses           | 17 | Report other analyses done—eg analyses of subgroups and interactions, and sensitivity analyses                                                                                                               | 15    |
| 10 |                          |    |                                                                                                                                                                                                              |       |
| 11 | <b>Discussion</b>        |    |                                                                                                                                                                                                              |       |
| 12 |                          |    |                                                                                                                                                                                                              |       |
| 13 | Key results              | 18 | Summarise key results with reference to study objectives                                                                                                                                                     | 16    |
| 14 | Limitations              | 19 | Discuss limitations of the study, taking into account sources of potential bias or imprecision. Discuss both direction and magnitude of any potential bias                                                   | 17,18 |
| 15 |                          |    |                                                                                                                                                                                                              |       |
| 16 | Interpretation           | 20 | Give a cautious overall interpretation of results considering objectives, limitations, multiplicity of analyses, results from similar studies, and other relevant evidence                                   | 18    |
| 17 |                          |    |                                                                                                                                                                                                              |       |
| 18 |                          |    |                                                                                                                                                                                                              |       |
| 19 | Generalisability         | 21 | Discuss the generalisability (external validity) of the study results                                                                                                                                        | 18    |
| 20 |                          |    |                                                                                                                                                                                                              |       |
| 21 | <b>Other information</b> |    |                                                                                                                                                                                                              |       |
| 22 | Funding                  | 22 | Give the source of funding and the role of the funders for the present study and, if applicable, for the original study on which the present article is based                                                | 19    |
| 23 |                          |    |                                                                                                                                                                                                              |       |
| 24 |                          |    |                                                                                                                                                                                                              |       |

\*Give information separately for exposed and unexposed groups.

**Note:** An Explanation and Elaboration article discusses each checklist item and gives methodological background and published examples of transparent reporting. The STROBE checklist is best used in conjunction with this article (freely available on the Web sites of PLoS Medicine at <http://www.plosmedicine.org/>, Annals of Internal Medicine at <http://www.annals.org/>, and Epidemiology at <http://www.epidem.com/>). Information on the STROBE Initiative is available at <http://www.strobe-statement.org>.

# BMJ Open

## Correlates of help-seeking by parents for the socio-emotional development of their 3-year-old children: a longitudinal study.

|                                 |                                                                                                                                                                                                                                                                                                                                                                                          |
|---------------------------------|------------------------------------------------------------------------------------------------------------------------------------------------------------------------------------------------------------------------------------------------------------------------------------------------------------------------------------------------------------------------------------------|
| Journal:                        | <i>BMJ Open</i>                                                                                                                                                                                                                                                                                                                                                                          |
| Manuscript ID                   | bmjopen-2021-052595.R2                                                                                                                                                                                                                                                                                                                                                                   |
| Article Type:                   | Original research                                                                                                                                                                                                                                                                                                                                                                        |
| Date Submitted by the Author:   | 06-Dec-2021                                                                                                                                                                                                                                                                                                                                                                              |
| Complete List of Authors:       | Luo, Jie; Erasmus Medical Center, Department of Public Health Raat, Hein; Erasmus Medical Center, Department of Public Health Franse, Carmen; Erasmus Medical Center, Department of Public Health Bannink, Rienke; CJG Rijnmond, Afdeling Beleid & Onderzoek BAI, GUANNAN; Erasmus Medical Center, Department of Public Health van Grieken, Amy; Erasmus MC, Department of Public Health |
| <b>Primary Subject Heading</b>: | Public health                                                                                                                                                                                                                                                                                                                                                                            |
| Secondary Subject Heading:      | Health services research, Public health                                                                                                                                                                                                                                                                                                                                                  |
| Keywords:                       | Child & adolescent psychiatry < PSYCHIATRY, MENTAL HEALTH, PRIMARY CARE                                                                                                                                                                                                                                                                                                                  |
|                                 |                                                                                                                                                                                                                                                                                                                                                                                          |

SCHOLARONE™  
Manuscripts



I, the Submitting Author has the right to grant and does grant on behalf of all authors of the Work (as defined in the below author licence), an exclusive licence and/or a non-exclusive licence for contributions from authors who are: i) UK Crown employees; ii) where BMJ has agreed a CC-BY licence shall apply, and/or iii) in accordance with the terms applicable for US Federal Government officers or employees acting as part of their official duties; on a worldwide, perpetual, irrevocable, royalty-free basis to BMJ Publishing Group Ltd ("BMJ") its licensees and where the relevant Journal is co-owned by BMJ to the co-owners of the Journal, to publish the Work in this journal and any other BMJ products and to exploit all rights, as set out in our [licence](#).

The Submitting Author accepts and understands that any supply made under these terms is made by BMJ to the Submitting Author unless you are acting as an employee on behalf of your employer or a postgraduate student of an affiliated institution which is paying any applicable article publishing charge ("APC") for Open Access articles. Where the Submitting Author wishes to make the Work available on an Open Access basis (and intends to pay the relevant APC), the terms of reuse of such Open Access shall be governed by a Creative Commons licence – details of these licences and which [Creative Commons](#) licence will apply to this Work are set out in our licence referred to above.

Other than as permitted in any relevant BMJ Author's Self Archiving Policies, I confirm this Work has not been accepted for publication elsewhere, is not being considered for publication elsewhere and does not duplicate material already published. I confirm all authors consent to publication of this Work and authorise the granting of this licence.



1  
2  
3 1 **Correlates of help-seeking by parents for the socio-emotional development of their 3-year-**  
4 **old children: a longitudinal study.**  
5 2  
6  
7 3  
8  
9 4  
10

11 5 **List of authors:**  
12

|       |                                                                                              |                           |                     |
|-------|----------------------------------------------------------------------------------------------|---------------------------|---------------------|
| 13 6  | Jie Luo <sup>1</sup>                                                                         | j.luo@erasmusmc.nl        | 0000-0002-0500-0101 |
| 14 7  | Hein Raat <sup>1</sup>                                                                       | h.raat@erasmusmc.nl       | 0000-0002-6000-7445 |
| 15 8  | Carmen B. Franse <sup>1</sup>                                                                | c.franse@erasmusmc.nl     | 0000-0002-7953-7817 |
| 16 9  | Rienke Bannink <sup>2</sup>                                                                  | r.bannink@cjgrijnmond.nl  | 0000-0002-6980-7107 |
| 17 10 | Guannan Bai <sup>1</sup>                                                                     | g.bai@erasmusmc.nl        | 0000-0003-0619-7580 |
| 18 11 | Amy van Grieken <sup>1*</sup>                                                                | a.vangrieken@erasmusmc.nl | 0000-0001-6767-9159 |
| 19    |                                                                                              |                           |                     |
| 20    |                                                                                              |                           |                     |
| 21    |                                                                                              |                           |                     |
| 22    |                                                                                              |                           |                     |
| 23    |                                                                                              |                           |                     |
| 24    |                                                                                              |                           |                     |
| 25    |                                                                                              |                           |                     |
| 26    |                                                                                              |                           |                     |
| 27    |                                                                                              |                           |                     |
| 28    |                                                                                              |                           |                     |
| 29    |                                                                                              |                           |                     |
| 30    |                                                                                              |                           |                     |
| 31    |                                                                                              |                           |                     |
| 32    |                                                                                              |                           |                     |
| 33    |                                                                                              |                           |                     |
| 34 15 | <b>Affiliations:</b>                                                                         |                           |                     |
| 35 16 | <sup>1</sup> Erasmus Medical Center, Department of Public Health, Rotterdam, the Netherlands |                           |                     |
| 36 17 | <sup>2</sup> CJG Rijnmond (Youth Health Care Center), Rotterdam, the Netherlands             |                           |                     |
| 37    |                                                                                              |                           |                     |
| 38    |                                                                                              |                           |                     |
| 39    |                                                                                              |                           |                     |
| 40 18 |                                                                                              |                           |                     |
| 41    |                                                                                              |                           |                     |
| 42 19 | * Corresponding Author                                                                       |                           |                     |
| 43    |                                                                                              |                           |                     |
| 44 20 |                                                                                              |                           |                     |
| 45    |                                                                                              |                           |                     |
| 46    |                                                                                              |                           |                     |
| 47 21 |                                                                                              |                           |                     |
| 48    |                                                                                              |                           |                     |
| 49 22 |                                                                                              |                           |                     |
| 50    |                                                                                              |                           |                     |
| 51 23 |                                                                                              |                           |                     |
| 52    |                                                                                              |                           |                     |
| 53    |                                                                                              |                           |                     |
| 54    |                                                                                              |                           |                     |
| 55    |                                                                                              |                           |                     |
| 56    |                                                                                              |                           |                     |
| 57    |                                                                                              |                           |                     |
| 58    |                                                                                              |                           |                     |
| 59    |                                                                                              |                           |                     |
| 60    |                                                                                              |                           |                     |

## 24 **Abstract**

25 **Objectives** Timely parental help-seeking regarding their child's socio-emotional development is  
26 associated with a lower rate and lower severity of psychosocial problems in later life. This study  
27 aimed to examine the correlates of parental help-seeking for the socio-emotional development of  
28 3-year-old children.

29 **Design** Retrospective cohort study.

30 **Setting** Community-based survey in Rotterdam.

31 **Participants** Of 2305 parents and their 2-year-old children at baseline, 1507 who completed  
32 follow-up questionnaires were included in the analyses when children were three years old.

33 **Outcome measures** Parental help-seeking regarding their child's socio-emotional development  
34 and types of formal and informal help sources (e.g. General practitioner, internet) used in the past  
35 12 months were measured. Hierarchical logistic regression models were applied to identify factors  
36 correlates of parental help-seeking among thirteen predisposing, enabling, and need factors  
37 according to Andersen's Behavioral Model.

38 **Results** In total, 22.6% of parents reported help-seeking in the past 12 months for socio-  
39 emotional development of their 3-year-old child; 6.8% addressed formal help sources and 17.5%  
40 addressed informal help sources. General practitioner (2.7%) and family (12.5%) were the most  
41 frequently used formal and informal sources, respectively. In the full model, predisposing factors  
42 associated with higher odds of parental help-seeking were child's other western ethnic  
43 background (OR=1.66, 95%CI: 1.02-2.68) and parental age  $\leq$  29 years old (OR=1.71, 95%CI:  
44 1.01-2.92). No associated factors were found among enabling factors. The need factors  
45 associated with a higher odds of parental help-seeking were having previous help-seeking  
46 (OR=2.52, 95%CI: 1.83-3.48) and discussing child's socio-emotional development in the well-  
47 child visit (OR=2.47, 95%CI: 1.73-3.53).

48 **Conclusions** Predisposing and need factors were associated with parental help-seeking for  
49 socio-emotional development of 3-years-old children. The findings can be used to further develop  
50 support for parents accessing adequate information, prevention, and anticipatory care with regard  
51 to the child's socio-emotional development.

52

53

## 54 **Strengths and limitations of this study**

- 56 • A longitudinal dataset was realized from a diverse community population.
- 57 • A broad assessment of potential factors associated with parental help-seeking behavior,  
58 including predisposing, enabling, and need factors following Andersen's Behavioral Model, was  
59 performed.
- 60 • Both formal and informal types of help-seeking sources were studied.
- 61 • Self-reported help-seeking behavior can be subject to social desirability bias and recall  
62 bias.
- 63 • Generalization is limited to the sample under study, the participation rate and loss to follow  
64 up were considerable.

## 65 **Introduction**

66 Psychosocial problems, such as attention deficit hyperactivity disorders (ADHD), conduct  
67 disorders, and anxiety disorders, are relatively common among young children.<sup>1, 2</sup> The literature  
68 suggests that 7%–25% of children worldwide experience psychosocial problems in early  
69 childhood (0-6 years).<sup>3-8</sup> Significantly, these psychosocial problems can track into adulthood.<sup>9-11</sup>  
70 Timely detection of (risk for) psychosocial problems and, consequently, offering appropriate  
71 interventions in early childhood can reduce problems and improve children's cognitive and  
72 academic performance.<sup>1, 2, 5</sup>

73 In order to identify psychosocial problems, validated instruments are often used for diagnosing  
74 emotional and behavioral problems in children under 18 years old.<sup>12</sup> At younger ages, certain  
75 behaviors (e.g. hitting, tantrums) can to some extent be part of the normal healthy development  
76 of psychosocial behavior of a child.<sup>13</sup> Therefore, for younger children instruments such as the  
77 Brief Infant–Toddler Social and Emotional Assessment (BITSEA) are used to detect 'at-risk'  
78 behavior. Studies show that children's 'at-risk' behavior can change to not at-risk and vice versa  
79 over time.<sup>14, 15</sup> Since young children's ability to express their psychosocial well-being is developing,  
80 parents and professionals have an important role in monitoring the child's socio-emotional  
81 development.<sup>16-18</sup> It is therefore important that parents take action for their concerns about their  
82 child's socio-emotional development to determine whether and what type of support is needed.

83 Help-seeking for such concerns might be guided by several factors, and, in this regard, Andersen  
84 and Newman provide a framework for health service use.<sup>19</sup> The framework postulates that the  
85 behavior of health service use depends on the three core groups of factors: (1) predisposing

1  
2  
3 86 factors (demographic and social characteristics); (2) enabling factors (the ability to access  
4 87 services) and (3) need factors (the internal and external need for health care services). Previous  
5 88 studies have found that predisposing factors, such as child's ethnic background and gender, are  
6 89 associated with parental help-seeking.<sup>20, 21</sup> Enabling factors, such as higher parental educational  
7 90 levels and higher incomes, have been shown to positively encourage parents to seek help for  
8 91 their child's problem behavior (4-14 years old).<sup>22, 23</sup> An important need factor that has been  
9 92 reported to increase help-seeking by parents is recognition of the child's problem (6-11 years  
10 93 old).<sup>17, 24</sup> Meanwhile, single-parent families, the high cost of professional mental health services,  
11 94 and the self-stigma of parents have been indicated as barriers to help-seeking for children's socio-  
12 95 emotional development (3-11 years old).<sup>25-27</sup> It is estimated that approximately one-third of parents  
13 96 seek help for the socio-emotional development of their children aged 4 to 11 who are at risk of  
14 97 psychosocial problems.<sup>25, 28, 29</sup> Moreover, thus far, research about parental help-seeking for the  
15 98 socio-emotional development has focused on school-aged children (4-12 years old) and  
16 99 adolescents (12-18 years old) rather than preschool children (0-4 years old).<sup>21, 23, 24, 28, 29</sup>

100 In the literature so far, parental help-seeking for socio-emotional problems of preschool children  
101 is rarely reported. Also, studies regarding parental help-seeking and children's socio-emotional  
102 problems have often been evaluating on a limited number of potential correlates.<sup>30</sup> The current  
103 study aimed to identify correlates of parental help-seeking regarding the socio-emotional  
104 development of 3-year-old children. Following the Andersen & Newman framework, we studied  
105 the association between parental help-seeking and the three core factors: predisposing, enabling,  
106 and need factors. In addition, we explored the formal and informal help sources used in help-  
107 seeking.

## 108 **Methods**

### 109 **Study design and population**

110 For the present study, data were collected by parental questionnaires when the child was 2 years  
111 old and again with a follow-up at 3 years old. In 2014 and 2015, parents living in the Rotterdam–  
112 Rijnmond area were invited by letter to participate in the study with their 2-year-old child. Parents  
113 were asked to complete and return the baseline questionnaire accompanied with a signed  
114 informed consent form when they visited the Dutch Preventive Youth Health Care (YHC) center  
115 for their regular well-child visit. In the Netherlands, regular well-child visits are one element of  
116 YHC which is offered free of charge to monitor and promote the health, well-being, and  
117 development of children aged 0-19 years.<sup>31</sup> One year later, parents enrolled in the study received

1  
2  
3 118 the follow-up questionnaire by e-mail or by mail with the request to return the completed  
4  
5 119 questionnaire to the researchers in a pre-paid envelope.

6  
7 120 From November 2014 to August 2015, 8937 parents attended for their 2-year child well-child visit,  
8  
9 121 according to the YHC register. Of these, 2316 parents gave their consent to participate in the  
10  
11 122 study (participation rate=25.9%) and 2305 parents completed the first questionnaires (response  
12  
13 123 rate=99.5%). At the one-year follow-up, 1540 parents completed the second questionnaire.  
14  
15 124 Children whose questionnaires were completed by other caregivers instead of their parents (n=33)  
16  
17 125 were excluded. Thus, 1507 participants were included in the analyses of this study (see Figure  
18  
19 126 1).

### 20 127 Parental help-seeking

21 128 When the children were 3 years old, parental help-seeking was assessed by asking parents  
22  
23 129 whether they had sought help in the past 12 months with regard to issues with their child's  
24  
25 130 behavior or socio-emotional development. Parents could indicate yes/no whether they sought  
26  
27 131 help at one or more of the following formal and informal help sources: 1) general practitioner (GP),  
28  
29 132 2) youth protection service, 3) mental health care professionals (e.g., psychiatrist and child  
30  
31 133 psychiatry outpatient clinic), 4) parenting support service (e.g., parenting courses and pedagogue  
32  
33 134 service), 5) social worker, 6) family, 7) friend/acquaintance/neighbor, 8) internet, 9)  
34  
35 135 complementary medicine (e.g., homoeopathy), 10) emergency telephone service, 11) prayer  
36  
37 136 house (e.g., church, mosque or synagogue). There was an open answer possibility for parents to  
38  
39 137 report other sources, and answers were recoded into the existing response categories or recoded  
40  
41 138 into the new generated options: 12) book/magazines, 13) daycare center/school and 14)  
42  
43 139 specialized medical care (e.g., clinical, rehabilitation). Parents could choose multiple options.  
44  
45 140 When the parent chose one of the above options, one point was scored. A total score was  
46  
47 141 generated by summing up all confirmatory responses (range 0-14). Total scores were  
48  
49 142 dichotomized into 'no' (none confirmatory options) indicating parents did not seek help from any  
50  
51 143 sources and 'yes' (one or more confirmatory options) indicating parent sought help from one or  
52  
53 144 more help sources for children's socio-emotional development in the past 12 months.

### 54 145 Formal and informal help sources

55 146 The above response categories (1-14) were categorized into formal help sources and informal  
56  
57 147 help sources. Formal help sources were GP (1), youth protection service (2), mental health care  
58  
59 148 professionals (3), parenting support service (4), social worker (5), and specialized medical care  
60  
149 (14). The remaining options were categorized as informal help: family (6),  
150  
151 150 friend/acquaintance/neighbor (7), internet (8), complementary medicine (9), emergency

1  
2  
3 151 telephone service (10), prayer house (11), book/magazine (12) and daycare center/school (13).  
4  
5 152 Scores within each category were added up and two variables were generated: 'formal help  
6  
7 153 source used' and 'informal help source used'. For both variables, the responses were  
8  
9 154 dichotomized into 'no' (total score=0) and 'yes' (total scores $\geq$ 1).

## 10 155 Potential correlates of parental help-seeking

### 12 156 *Predisposing factors*

14 157 Predisposing factors included child age, child gender, child ethnic background, and parental age  
15  
16 158 measured at child-age 2 years. Child age (in months) at time of measurement was reported by  
17  
18 159 parents. Child ethnic background (Dutch, other western, non-western) was defined based on  
19  
20 160 country of birth of both parents according to the Classification of Statistics Netherlands.<sup>32</sup> When  
21  
22 161 both parents were born in the Netherlands, the child was considered to have a Dutch background.  
23  
24 162 When one parent was born outside the Netherlands, this country of birth determined child's ethnic  
25  
26 163 background. When both parents were born outside the Netherlands, mother's country of birth  
27  
28 164 determined the child's ethnic background.<sup>32</sup> Parental age (in years) was reported by parents at  
29  
30 165 baseline and classified into three categories based on the distribution: '>=40 years', '30-39 years'  
31  
32 166 and '<=29 years'.

### 31 167 *Enabling factors*

33 168 Enabling factors assessed at 24 months included parental educational level, parental work status,  
34  
35 169 and family composition. Parental educational level was measured by one item asking about the  
36  
37 170 highest level of education finalized by the respondent (mother or father) at 24 months. Educational  
38  
39 171 level was categorized as high (higher vocational education, university), middle (higher secondary  
40  
41 172 education, vocational education), or low (primary education, lower secondary education).<sup>33</sup>  
42  
43 173 Respondents to the questionnaire were asked to report their work status. Parental work status  
44  
45 174 reflects in 89.3% the mother's employment and 10.7% the father's work status. Parental work  
46  
47 175 status was classified as 'employed (including full-time job and part-time job)' and 'unemployed'.  
48  
49 176 The family composition was categorized into two-parent family or one-parent family.

### 48 177 *Need factors*

50 178 Need factors included the BITSEA Problem and Competence scale, stressful life events, child's  
51  
52 179 general health, parental satisfaction of child's development, previous help-seeking and discussing  
53  
54 180 child's socio-emotional development in the well-child visit.

1  
2  
3 181 The BITSEA consists of a 31-item Problem scale and an 11-item Competence scale which  
4 182 measures psychosocial well-being in children 12-36 months. Each item is scored 0 for 'not true',  
5 183 1 for 'somewhat true', and 2 for 'certainly true'.<sup>34</sup> The items from the two scales of BITSEA are  
6 184 summed up independently. A score of 14 or higher on the Problem scale was categorized as 'at  
7 185 risk of psychosocial problems', and a score of 15 or lower on the competence scale was termed  
8 186 as 'at risk of competence delay'.<sup>35, 36</sup> In the previous study of Kruizinga among Dutch parents and  
9 187 children (n=3127), the BITSEA showed Cronbach's alphas of 0.76 and 0.63, and a test-retest  
10 188 reliability of 0.75 and 0.61.<sup>37</sup> In the present study, the Cronbach's alphas were 0.74 and 0.54.

11 189 Stressful life events were measured by assessing the occurrence of twelve stressful life events,  
12 190 such as a family relocation, divorce, or financial problems. If an event had happened, parents  
13 191 indicated when the specific life event happened: last year, 1-2 years ago, 3-4 years ago, or more  
14 192 than 4 years ago. When parents confirmed the occurrence of one event within the past two years  
15 193 (the first two options), one point was scored. If one event happened two years ago, then the event  
16 194 was not counted as a stressful life event for the child. A total score was calculated by summing  
17 195 up the points assigned. The stressful life events variable was generated with two categories based  
18 196 on the total score: total score 0 indicating 'no' and  $\geq 1$  'yes'.

19 197 The child's general health (good vs poor) and parental satisfaction of the child's development (yes  
20 198 vs no) were measured by two subscales of the Infant Toddler Quality of Life Questionnaire of 47  
21 199 items (ITQOL-SF47).<sup>38</sup> According to the user manual, the raw scores of each variable were  
22 200 transformed and dichotomized. The scores above the cut-off point indicated a child's good general  
23 201 health and parent-satisfied development, respectively.<sup>39</sup> In previous research by Raat among  
24 202 general Dutch children (n=500), these two subscales showed Cronbach's alphas of 0.76 and 0.63,  
25 203 and a test-retest reliability of 0.75 and 0.6.<sup>40</sup> The Cronbach's alphas of the general health and  
26 204 parent-satisfied development in this study were 0.59 and 0.67.

27 205 Previous help-seeking was assessed at 24 months with the question: 'Have you sought help for  
28 206 your child due to his/her socio-emotional development from the following sources in the past two  
29 207 years?'. The answer options (1-14) were the same as the help-seeking question at 36 months.  
30 208 These options were re-categorized in the same way: 'no' (none confirmatory options) and 'yes'  
31 209 (one or more confirmatory options).

32 210 The discussion of the child's socio-emotional development in the well-child visit was measured  
33 211 by one question: 'During the regular well-child visit with YHC when the child was two years old,

1  
2  
3 212 were any specifics regarding your child's behavior, social, and emotional development discussed?'

4  
5 213 The options were 'no' and 'yes'.

6  
7 214 Patient and public involvement statement

8  
9 215 Neither patients nor the public was involved in the planning, design, conduct or reporting of this  
10 216 study.

11  
12 217 Statistical analysis

13  
14 218 Descriptive statistics were used to describe the characteristics of the study population.

15  
16 219 Hierarchical logistic regression models were fitted to investigate the correlates of help-seeking.

17  
18 220 Data were collected during the well-child visit when child was 2 years old, so the age of child was

19  
20 221 removed from the logistic regression analysis. All categorized variables were included as the

21  
22 222 independent variables by block. The Omnibus Test, a likelihood-ratio chi-square statistic, was

23  
24 223 used to assess the contribution of each block of variables to the model.<sup>41</sup> The first model (model

25  
26 224 1) regarded predisposing variables as independent variables. The second model (model 2)

27  
28 225 additionally included enabling variables as independent variables. Finally, a third full model

29  
30 226 (model 3) with all variables from the three blocks was fitted. Descriptive statistics were used to

31  
32 227 describe formal and informal help-seeking of parents. Multicollinearity was examined using

33  
34 228 correlation analyses for categorical variables. Maximal coefficient  $r=0.254$  indicated a weak

35  
36 229 correlation ( $0.2 < r < 0.4$ ), therefore, all variables were included in the regression analyses.

37  
38 230 Furthermore, we assessed interactions between the 13 potential correlates of help-seeking

39  
40 231 behavior and child gender, child ethnic background, parental age, and parental education level

41  
42 232 with regard to the association with help-seeking. After applying Bonferroni correction for multiple

43  
44 233 testing ( $p=0.05/42=0.001$ ), no statistically significant interactions were found (Supplementary

45  
46 234 Table S1). A non-response analysis was conducted to assess differences between participants

47  
48 235 participating in follow-up and those lost to follow-up (Supplementary Table S2). The McNemar's

49  
50 236 test was applied to examine whether more parents used informal help sources among the parents

51  
52 237 who reported help-seeking (Supplementary Table S3). To provide more details, the

53  
54 238 characteristics of the study population by use of sources were provided in the Supplementary

55  
56 239 Table S4.

57  
58 240 Regarding the missing data among the sample of 1507 children, multiple imputation by Fully

59  
60 241 Conditional Specification (FCS) was used to deal with the missing values on all independent

242 variables in SPSS.<sup>42</sup> The pooled results of five imputed datasets were used. Finally, we performed

243 a sensitivity analysis using complete-case data without missing values to check the robustness



1  
2  
3 244 of results (Supplementary Table S5). A p-value <0.05 was considered to be statistically significant.

4  
5 245 All analyses were completed using the IBM SPSS version 25 (IBM Corp., Armonk, NY, USA).  
6  
7  
8  
9  
10  
11  
12  
13  
14  
15  
16  
17  
18  
19  
20  
21  
22  
23  
24  
25  
26  
27  
28  
29  
30  
31  
32  
33  
34  
35  
36  
37  
38  
39  
40  
41  
42  
43  
44  
45  
46  
47  
48  
49  
50  
51  
52  
53  
54  
55  
56  
57  
58  
59  
60

For peer review only

## Results

### Characteristics of the study population

Of all parents, 22.6% (n=341) reported help-seeking in the past 12 months for their 3-year-old child's psychosocial health; 6.8% (n=103) addressed formal help sources and 17.5% (n=264) addressed informal help sources. As for children, the mean age was 24.5 (SD=1.8) months (Table 1). Half of the children were boys (49.4%), 80.2% were Dutch, and 93.8% of the children lived in a two-parent family. Most parents were 30-39 years old (70.1%), employed (81.2%), and 59.6% had a high educational level. Regarding comparison between parents with help-seeking experience and their counterparts, two predisposing factors child age ( $p>0.05$ ) and child gender ( $p>0.05$ ) were not significantly different.

Table 1. Characteristics of the study population (n=1507)

| Items                       | Total<br>(n=1507)<br>Mean $\pm$ SD N(%) | Help-seeking                      |                                   | p value    |
|-----------------------------|-----------------------------------------|-----------------------------------|-----------------------------------|------------|
|                             |                                         | No (n=1166)<br>Mean $\pm$ SD N(%) | Yes (n=341)<br>Mean $\pm$ SD N(%) |            |
| <b>Predisposing Factors</b> |                                         |                                   |                                   |            |
| Child age in months         | 24.5 $\pm$ 1.8                          | 24.5 $\pm$ 1.8                    | 24.5 $\pm$ 1.9                    | 0.802      |
| Child gender                |                                         |                                   |                                   | 0.566      |
| Boys                        | 739 (49.4)                              | 568 (49.0)                        | 171 (50.7)                        |            |
| Girls                       | 758 (50.6)                              | 592 (51.0)                        | 166 (49.3)                        |            |
| Child ethnic background     |                                         |                                   |                                   | 0.026*     |
| Dutch                       | 1161 (80.2)                             | 917 (81.7)                        | 244 (75.1)                        |            |
| Other western               | 107 (7.4)                               | 75 (6.7)                          | 32 (9.8)                          |            |
| Non-western                 | 179 (12.4)                              | 130 (11.6)                        | 49 (15.1)                         |            |
| Parental age in years       |                                         |                                   |                                   | 0.003**    |
| $\geq$ 40                   | 166 (11.1)                              | 140 (12.1)                        | 26 (7.7)                          |            |
| 30-39                       | 1048 (70.1)                             | 818 (70.6)                        | 230 (68.0)                        |            |
| $\leq$ 29                   | 282 (18.9)                              | 200 (17.3)                        | 82 (24.3)                         |            |
| <b>Enabling Factors</b>     |                                         |                                   |                                   |            |
| Parental educational level  |                                         |                                   |                                   | 0.003**    |
| High                        | 883 (59.9)                              | 710(62.3)                         | 173 (52.0)                        |            |
| Middle                      | 498 (33.8)                              | 362 (31.8)                        | 136 (40.8)                        |            |
| Low                         | 92 (6.2)                                | 68 (6.0)                          | 24 (7.2)                          |            |
| Parental work status        |                                         |                                   |                                   | < 0.001*** |
| Employed                    | 1195(81.8)                              | 947 (83.9)                        | 248 (74.7)                        |            |
| Unemployed                  | 266 (18.2)                              | 182 (16.1)                        | 84 (25.3)                         |            |
| Family composition          |                                         |                                   |                                   | 0.004**    |
| Two-parent family           | 1386 (93.8)                             | 1084 (94.8)                       | 302 (90.4)                        |            |

|    |                                          |             |             |            |
|----|------------------------------------------|-------------|-------------|------------|
| 1  |                                          |             |             |            |
| 2  |                                          |             |             |            |
| 3  | Single-parent family                     | 92 (6.2)    | 60 (5.2)    | 32 (9.6)   |
| 4  | <b>Need Factors</b>                      |             |             |            |
| 5  |                                          |             |             |            |
| 6  | BITSEA Problem scale score               |             |             | < 0.001*** |
| 7  | No risk                                  | 1400 (94.0) | 1101 (95.6) | 299 (88.5) |
| 8  | At risk                                  | 90 (6.0)    | 51 (4.4)    | 39 (11.5)  |
| 9  |                                          |             |             |            |
| 10 | BITSEA Competence scale                  |             |             | 0.011*     |
| 11 | score                                    |             |             |            |
| 12 | No risk                                  | 1300 (88.0) | 1017 (89.1) | 283 (84.0) |
| 13 | At risk                                  | 178 (12.0)  | 124 (10.9)  | 54(16.0)   |
| 14 |                                          |             |             |            |
| 15 | Stressful life events                    |             |             | < 0.001*** |
| 16 | No                                       | 749 (51.0)  | 608 (53.5)  | 141 (42.3) |
| 17 | Yes                                      | 720 (49.0)  | 528 (46.5)  | 192 (57.7) |
| 18 |                                          |             |             |            |
| 19 | General health of the child <sup>a</sup> |             |             | 0.007**    |
| 20 | Good                                     | 1370 (92.2) | 1070(93.2)  | 300 (88.8) |
| 21 | Poor                                     | 116 (7.8)   | 78 (6.8)    | 38 (11.2)  |
| 22 |                                          |             |             |            |
| 23 | Parental satisfaction of                 |             |             | <0.001***  |
| 24 | child's development <sup>b</sup>         |             |             |            |
| 25 | Yes                                      | 1380 (94.7) | 1074(95.9)  | 306 (90.5) |
| 26 | No                                       | 78 (5.3)    | 46(4.1)     | 32 (9.5)   |
| 27 |                                          |             |             |            |
| 28 | Previous help-seeking                    |             |             | <0.001***  |
| 29 | No                                       | 1208 (82.2) | 992 (87.1)  | 216 (65.5) |
| 30 | Yes                                      | 261 (17.8)  | 147 (12.9)  | 114 (34.5) |
| 31 |                                          |             |             |            |
| 32 | Discussion of child's socio-             |             |             | <0.001***  |
| 33 | emotional development in                 |             |             |            |
| 34 | the well-child visit                     |             |             |            |
| 35 | No                                       | 1196 (85.6) | 980 (89.8)  | 216 (70.6) |
| 36 | Yes                                      | 201 (14.4)  | 111 (10.2)  | 90 (29.4)  |

Note: This table presents non-imputed data.

The missing numbers of variables are child gender (n=10), child ethnic background (n=60), parental age (n=11), parental educational level (n=34), parental work status (n=46), family composition (n=29), BITSEA Problem scale score (n=17), BITSEA Competence scale score (n=29), stressful life events (n=38), general health of the child (n=21), parental satisfaction of child's development (n=49), previous help-seeking (n=38), and discussion of child socio-emotional development in the well-child visit (n=110).

Data presented as mean  $\pm$  SD or number (percentage). Significant differences between two subgroups of help-seeking and non-help-seeking parents were evaluated at 0.05 level using independent T tests for continuous variables and  $\chi^2$  tests for categorical variables.

a. General health of the child was measured by the 4-item subscale General Health of the Infant Toddler Quality of Life Questionnaire (47 items).

b. Parental satisfaction of child's development was measured by the 5-item subscale Satisfaction of Child's Development of the Infant Toddler Quality of Life Questionnaire (47 items).

Abbreviation: SD=standard deviation; BITSEA= Brief Infant-Toddler Social and Emotional Assessment.

\*  $p < 0.05$ ; \*\*  $p < 0.01$ ; \*\*\*  $p < 0.001$ .

1  
2  
3  
4  
5  
6  
7  
8  
9  
10  
11  
12  
13  
14  
15  
16  
17  
18  
19  
20  
21  
22  
23  
24  
25  
26  
27  
28  
29  
30  
31  
32  
33  
34  
35  
36  
37  
38  
39  
40  
41  
42  
43  
44  
45  
46  
47  
48  
49  
50  
51  
52  
53  
54  
55  
56  
57  
58  
59  
60

### 271 Correlates of parental help-seeking

272 Table 2 presents the results of logistic regression analyses. Model 1 with predisposing factors as  
273 independent factors showed that having an other-western ethnic background (OR=1.73, 95%CI: 1.10-  
274 2.71) and non-western ethnic background as a child (OR=1.51, 95%CI: 1.05-2.18) as well as parental  
275 age =< 29 years old (OR=2.28, 95%CI: 1.38-3.77) were associated with a higher odds of parental help-  
276 seeking.

277 Model 2 shows the association between predisposing factors and enabling factors. Of predisposing  
278 factors, having an other-western ethnic background (OR=1.66, 95%CI: 1.05-2.60) and parental age =<29  
279 years old (OR=1.96, 95%CI: 1.17-3.27) were associated with parental help-seeking. Two enabling factors  
280 parental educational level (OR=1.36, 95%CI: 1.04-1.79) and parental employed status (OR=1.47, 95%CI:  
281 1.07-2.02) were associated with a higher odds of parental help-seeking.

282 In the full model (model 3), two predisposing factors having an other-western ethnic background as a  
283 child (OR=1.66, 95%CI: 1.02-2.68) and parental age=<29 years old (OR=1.71, 95%CI: 1.01-2.92) were  
284 associated with a higher odds for parental help-seeking. No associations were found between enabling  
285 factors and parental help-seeking. Of the need factors, previous help-seeking (OR=2.52, 95%CI: 1.83-  
286 3.48) and discussion of child socio-emotional development in the well-child visit (OR=2.47, 95%CI: 1.73-  
287 3.53) were associated with a higher odds of parental help-seeking for socio-emotional development at  
288 child age 3 years. The block of need factors contributed most to the full model according to the  $\chi^2$  by the  
289 Omnibus Test (all p-values<0.05).

290 Table 2. Associations between predisposing, enabling, and need factors and parental help-seeking in the past 12  
291 months for the 3-year-old child (n=1507)

|                             | Multivariate           |           |                         |           |                     |           |
|-----------------------------|------------------------|-----------|-------------------------|-----------|---------------------|-----------|
|                             | Model 1                |           | Model 2                 |           | Model 3             |           |
|                             | Predisposing variables |           | Plus enabling variables |           | Plus need variables |           |
| Block Statistics            | $\chi^2 = 22.38$       |           | $\chi^2 = 16.79$        |           | $\chi^2 = 107.09$   |           |
|                             | OR                     | 95% CI    | OR                      | 95% CI    | OR                  | 95% CI    |
| <b>Predisposing Factors</b> |                        |           |                         |           |                     |           |
| Child gender                |                        |           |                         |           |                     |           |
| Boys                        | Ref                    |           | Ref                     |           | Ref                 |           |
| Girls                       | 0.93                   | 0.73-1.19 | 0.93                    | 0.73-1.19 | 0.98                | 0.75-1.27 |
| Child ethnic background     |                        |           |                         |           |                     |           |
| Dutch                       | Ref                    |           | Ref                     |           | Ref                 |           |
| Other western               | 1.73*                  | 1.10-2.71 | 1.66*                   | 1.05-2.60 | 1.66*               | 1.02-2.68 |
| Non-western                 | 1.51*                  | 1.05-2.18 | 1.20                    | 0.81-1.78 | 1.18                | 0.77-1.79 |

|    |                                                                         |        |           |       |           |         |           |
|----|-------------------------------------------------------------------------|--------|-----------|-------|-----------|---------|-----------|
| 1  |                                                                         |        |           |       |           |         |           |
| 2  |                                                                         |        |           |       |           |         |           |
| 3  | Parental age in year                                                    |        |           |       |           |         |           |
| 4  | >=40                                                                    | Ref    |           | Ref   |           | Ref     |           |
| 5  |                                                                         |        |           |       |           |         |           |
| 6  | 30-39                                                                   | 1.56   | 0.99-2.46 | 1.57  | 1.00-2.46 | 1.45    | 0.90-2.32 |
| 7  | =<29                                                                    | 2.28** | 1.38-3.77 | 1.96* | 1.17-3.27 | 1.71*   | 1.01-2.92 |
| 8  |                                                                         |        |           |       |           |         |           |
| 9  | <b>Enabling Factors</b>                                                 |        |           |       |           |         |           |
| 10 | Parental educational level                                              |        |           |       |           |         |           |
| 11 | High                                                                    |        |           | Ref   |           | Ref     |           |
| 12 | Middle                                                                  |        |           | 1.36* | 1.04-1.79 | 1.30    | 0.97-1.74 |
| 13 | Low                                                                     |        |           | 1.12  | 0.67-1.89 | 1.10    | 0.63-1.90 |
| 14 |                                                                         |        |           |       |           |         |           |
| 15 | Parental work status                                                    |        |           |       |           |         |           |
| 16 | Employed                                                                |        |           | Ref   |           | Ref     |           |
| 17 | Unemployed                                                              |        |           | 1.47* | 1.07-2.02 | 1.28    | 0.91-1.80 |
| 18 |                                                                         |        |           |       |           |         |           |
| 19 | Family composition                                                      |        |           |       |           |         |           |
| 20 | Two-parent family                                                       |        |           | Ref   |           | Ref     |           |
| 21 | Single-parent family                                                    |        |           | 1.51  | 0.95-2.41 | 1.31    | 0.80-2.15 |
| 22 |                                                                         |        |           |       |           |         |           |
| 23 |                                                                         |        |           |       |           |         |           |
| 24 | <b>Need Factors</b>                                                     |        |           |       |           |         |           |
| 25 | BITSEA Problem scale score                                              |        |           |       |           |         |           |
| 26 | No risk                                                                 |        |           |       |           | Ref     |           |
| 27 | At risk                                                                 |        |           |       |           | 1.20    | 0.72-1.99 |
| 28 |                                                                         |        |           |       |           |         |           |
| 29 | BITSEA Competence scale score                                           |        |           |       |           |         |           |
| 30 | No risk                                                                 |        |           |       |           | Ref     |           |
| 31 | At risk                                                                 |        |           |       |           | 1.18    | 0.78-1.79 |
| 32 |                                                                         |        |           |       |           |         |           |
| 33 | Stressful life events                                                   |        |           |       |           |         |           |
| 34 | No                                                                      |        |           |       |           | Ref     |           |
| 35 | Yes                                                                     |        |           |       |           | 1.29    | 0.98-1.68 |
| 36 |                                                                         |        |           |       |           |         |           |
| 37 | General health of the child <sup>a</sup>                                |        |           |       |           |         |           |
| 38 | Good                                                                    |        |           |       |           | Ref     |           |
| 39 | Poor                                                                    |        |           |       |           | 1.16    | 0.73-1.85 |
| 40 |                                                                         |        |           |       |           |         |           |
| 41 | Parental satisfaction of child's development <sup>a</sup>               |        |           |       |           |         |           |
| 42 | Yes                                                                     |        |           |       |           | Ref     |           |
| 43 | No                                                                      |        |           |       |           | 1.35    | 0.75-2.45 |
| 44 |                                                                         |        |           |       |           |         |           |
| 45 | Previous help-seeking                                                   |        |           |       |           |         |           |
| 46 | No                                                                      |        |           |       |           | Ref     |           |
| 47 | Yes                                                                     |        |           |       |           | 2.52*** | 1.83-3.48 |
| 48 |                                                                         |        |           |       |           |         |           |
| 49 | Discussion of child socio-emotional development in the well-child visit |        |           |       |           |         |           |
| 50 | No                                                                      |        |           |       |           | Ref     |           |
| 51 | Yes                                                                     |        |           |       |           | 2.47*** | 1.73-3.53 |
| 52 |                                                                         |        |           |       |           |         |           |
| 53 |                                                                         |        |           |       |           |         |           |
| 54 |                                                                         |        |           |       |           |         |           |
| 55 |                                                                         |        |           |       |           |         |           |
| 56 |                                                                         |        |           |       |           |         |           |
| 57 |                                                                         |        |           |       |           |         |           |
| 58 |                                                                         |        |           |       |           |         |           |
| 59 |                                                                         |        |           |       |           |         |           |
| 60 |                                                                         |        |           |       |           |         |           |

1

2

3 292 Abbreviation: OR=Odds Ratio; CI=Confidence Interval; BITSEA= Brief Infant–Toddler Social and Emotional Assessment.  $\chi^2 =$

4 293 Model chi-square for each block of variables, all significant at  $p < 0.05$ .

5 294 Model 1: The model with predisposing factors as independent variables.

6 295 Model 2: The model with predisposing and enabling factors as independent variables.

7 296 Model 3: The full model with predisposing, enabling, and need factors as independent variables.

8 297 a. General health of the child was measured by the 4-item subscale General Health of the Infant Toddler Quality of Life  
9 298 Questionnaire (47 items).

10 299 b. Parental satisfaction of child's development was measured by the 5-item subscale Satisfaction of Child's Development of  
11 300 the Infant Toddler Quality of Life Questionnaire (47 items).

12 301 \*  $p < 0.05$ ; \*\*  $p < 0.01$ ; \*\*\*  $p < 0.001$

15

16

17

18

19

20

21

22

23

24

25

26

27

28

29

30

31

32

33

34

35

36

37

38

39

40

41

42

43

44

45

46

47

48

49

50

51

52

53

54

55

56

57

58

59

60

## Use of formal and informal help sources

Table 3 shows the frequency of formal and informal help sources used in parental help-seeking for their 3-year-old child's socio-emotional development in the past 12 months. Among the 341 parents who reported help-seeking, fewer parents (n=163) reported the use of formal help sources than parents (n=264) who reported the use of informal help sources ( $p<0.001$ , Supplementary Table S3); only 26 (7.6%) parents used both formal and informal help sources. The GP (12.0%) and parenting support services, such as parenting courses (9.4%), were the most frequently used formal help sources. Family (55.4%) and friends/acquaintance/neighbor (40.5%) were the most frequently used informal help sources. Characteristics of the study population by use of sources in parental help-seeking are presented in Supplementary Table S4.

Table 3. Use of formal and informal help sources in parental help-seeking in the past 12 months for the 3-year-old child (n=1507)

|                                                   | n          | Total sample (%)<br>(n=1507) | Help-seeking (Yes) (%)<br>(n=341) |
|---------------------------------------------------|------------|------------------------------|-----------------------------------|
| <b>Parents reported use of help sources (yes)</b> | 341        | 22.6                         | 100.0                             |
| Formal and informal help sources                  | 26         | 1.7                          | 7.6                               |
| Formal help source(s) only                        | 77         | 5.1                          | 22.6                              |
| Informal help source(s) only                      | 238        | 15.8                         | 69.8                              |
| <b>Type of help sources</b>                       |            |                              |                                   |
| Formal Sources (yes)                              | <u>103</u> | <u>6.8</u>                   | <u>30.2</u>                       |
| General practitioner                              | 41         | 2.7                          | 12.0                              |
| Parenting support service                         | 32         | 2.1                          | 9.4                               |
| Specialized medical care                          | 20         | 1.3                          | 5.9                               |
| Youth protection services                         | 18         | 1.2                          | 5.3                               |
| Mental health care professionals                  | 11         | 0.7                          | 3.2                               |
| Social worker                                     | 1          | 0.1                          | 0.3                               |
| Informal Sources (yes)                            | <u>264</u> | <u>17.5</u>                  | <u>77.4</u>                       |
| Family                                            | 189        | 12.5                         | 55.4                              |
| Friend/acquaintance/neighbor                      | 138        | 9.2                          | 40.5                              |
| Internet                                          | 71         | 4.7                          | 20.8                              |
| Daycare center/school                             | 12         | 0.8                          | 3.5                               |
| Complementary medicine                            | 4          | 0.3                          | 1.2                               |
| Emergency telephone service                       | 3          | 0.2                          | 0.9                               |
| Book/magazine                                     | 2          | 0.1                          | 0.6                               |
| Prayer house                                      | 1          | 0.1                          | 0.3                               |

Note. Parents could endorse more than one option; hence, the sum of each subcategory does not total up to 100%.

1  
2  
3  
4  
5  
6  
7  
8  
9  
10  
11  
12  
13  
14  
15  
16  
17  
18  
19  
20  
21  
22  
23  
24  
25  
26  
27  
28  
29  
30  
31  
32  
33  
34  
35  
36  
37  
38  
39  
40  
41  
42  
43  
44  
45  
46  
47  
48  
49  
50  
51  
52  
53  
54  
55  
56  
57  
58  
59  
60

### 315 Additional data analyses

316 Compared to participants lost in the follow-up (n=775), participants in the follow-up (n=1540) were, as a  
317 child, more likely to be at a younger age and have a Dutch ethnic background and, as a parent, to be at  
318 an older age and have a higher educational level (all  $p < 0.001$ ). No significant differences were found  
319 between boys and girls ( $p > 0.05$ ) (Supplementary Table S2).

Supplementary Table S5 shows the results of multivariate logistic regression conducted with non-imputed  
complete data. There was a difference between the full models of multivariate logistic regression  
conducted with non-imputed data and those with imputed data. In the imputed data analysis, parents of  
a child with other-western ethnic background (OR=1.66, 95%CI: 1.02-2.68) in the predisposing block  
were more likely to have help-seeking. This association was not significant (OR=1.51, 95%CI: 0.87-2.63)  
in the analysis conducted with complete data. On the other hand, stressful life events (OR=1.45, 95%CI:  
1.07-1.96) in the need block were associated with help-seeking in the complete data analysis but not in  
the imputed data analysis (OR=1.29, 95%CI: 0.98-1.68). Although the significance of the two factors  
changed, the pattern of relevant factors was similar. The rest of the factors in three blocks kept the same  
association and significance in the imputed data analysis and the complete data analysis, thereby  
indicating the robustness of the model. Furthermore, we conducted the Chi-square test of homogeneity,  
which showed that there were no significant differences (all p-values  $> 0.05$ ) between the characteristics  
of the imputed data and the complete data (Supplementary Table S6).



## Discussion

In the present study, correlates of parental help-seeking for the socio-emotional development of 3-year-old children were studied. Among predisposing factors, having an other-western ethnic background as a child and parental age younger than 29 years old indicated a higher odds of parental help-seeking for the socio-emotional development of children aged 3 years. Also, previous help-seeking and discussing the child's socio-emotional development in the well-child visit as need factors were associated with a higher odds for parental help-seeking. No correlate of parental help-seeking was found among enabling factors.

In the present study predisposing, enabling, and need factors were evaluated in relation to help-seeking behavior. The Andersen & Newman's framework composes of environment, population characteristics, health behavior, and outcome related to help-seeking behavior.<sup>43</sup> In the current study the information on the environment (including the health care system and external environment), and the information on the outcome (including perceived health status, evaluated health status, and consumer satisfaction) was not collected. We recommend future studies to get a complete overview of factors associated with help-seeking behavior. The findings of predisposing factors indicated parents of child with other-western background were more like to seek help, compared with parents of Dutch children. Existing studies on the association between minority ethnic background and help-seeking for children's socio-emotional development have shown conflicting results.<sup>44-47</sup> These differing results may be due to the different characteristics of minor ethnic backgrounds as well as differing help-seeking measures among the studies.<sup>47, 48</sup> Although parents of children from minority ethnic background perceived more barriers to access formal help-seeking, studies report these parents are able to access informal help sources as easily and as equally to native parents<sup>26, 49-51</sup> Moreover, the health care framework in the Netherlands (e.g. equal primary care, collaboration of professionals in the community, universal health care), and social contexture (e.g. language and cultural similarity) may partly reduce barriers to health care among the parents with other-western background.<sup>52-54</sup> Besides the child's other-western background, as a predisposing factor, parental age was also associated with help-seeking: younger parents were more likely to seek help for their 3-year-old child. Previous studies have reported first-time parents to be more open and actively involved in searching for information about parenting and child development.<sup>55</sup> First-time parents are also more likely to reach out for help.<sup>56</sup> In the current study, we were unable to adapt for the parity of the child; therefore, we were not able to evaluate whether this explanation might hold for our findings.

With regard to enabling factors without correction for the need factors, parental educational level and employment status were associated with help-seeking. After correction for the need factors, parental educational level, employment status and family composition were not significantly associated. Studies

1  
2  
3 367 on association between three enabling factors and help-seeking have reported contrary results. In the  
4  
5 368 Netherlands, equal access to primary care (e.g. GPs and YHC), to comprehensive care professionals in  
6  
7 369 clinics and communities, and to universal health care may reduce the barriers for parents in the enabling  
8 370 domain.<sup>52, 53</sup> Similar results have been found in other studies conducted in a similar context.<sup>51, 57, 58</sup>  
9

10 371 The need factors in the Andersen & Newman's framework consist of perceived need and evaluated  
11  
12 372 need.<sup>43</sup> Parent-reported general health of the child and parental satisfaction with child's development  
13 373 reflect most closely the perceived need, while the BITSEA-score and discussion with YHC professionals  
14  
15 374 most closely reflect the evaluated need (i.e., being more clinical assessments). With regard to need  
16  
17 375 factors, we observed that parents seeking any help for their child's socio-emotional development before  
18 376 the age of 2 years were more likely to seek help in the past 12 months at child age 3 years. It is plausible  
19  
20 377 that parents who had previous help-seeking may be able to deal better with barriers (e.g. parents' self-  
21 378 stigma) and with exploring more sources in terms of help-seeking.<sup>47</sup> In addition, the literature regarding  
22  
23 379 the use of mental health service for children and adolescents suggests that social and emotional  
24 380 problems exist over a longer period of time.<sup>21, 59</sup> Therefore, it is suggested that for actual problem behavior  
25  
26 381 longitudinal care is needed.<sup>11, 29, 60</sup> Furthermore, parents who had previously discussed their child's socio-  
27  
28 382 emotional development in the well-child visit at the child age of 2 years, were more likely to seek help in  
29 383 the past 12 months. In the Netherlands, the discussion during the well-child visit could be raised by  
30  
31 384 parents or YHC professionals. The YHC professionals can suggest a discussion based on the evaluation  
32 385 of the child's socio-emotional development. Parents also can consult on this issue if they are concerned  
33  
34 386 about their child's socio-emotional development. In this capacity, the YHC professional assists the parent  
35 387 to recognize early childhood psychosocial problems. Although recognition of problem behavior by parents  
36  
37 388 has been reported to be difficult for parents, it is important for them to be able to seek help in time.<sup>5, 17, 20,</sup>  
38  
39 389 <sup>28, 44</sup> The YHC thus plays a crucial role in screening and identifying children's social and emotional  
40 390 problems in the Netherlands.<sup>61</sup>  
41  
42

43 391 In total, 6.0% of 1507 children were at risk of socio-emotional problems measured by BITSEA Problem  
44 392 scale, and 12% were at risk of delay of socio-emotional competence measured by BITSEA Competence  
45  
46 393 scale. The rates of socio-emotional development problems in this study were comparable with these  
47  
48 394 measured by other instruments, such as 17% at moderate risk and 11% at high risk of developmental  
49 395 delays measured by the Parent Evaluation of Developmental Status among children (0-5 years old) in  
50  
51 396 the American National Survey of Children's Health.<sup>62, 63</sup> Consistent with previous studies in school-aged  
52 397 children, our results showed that formal help sources were used less frequently than informal help  
53  
54 398 sources for children's socio-emotional development.<sup>24, 25</sup> Gaining access to formal help sources may have  
55 399 more barriers, such as iterative referral processes, long waiting times, and high costs.<sup>26, 49, 64</sup> The informal  
56

1  
2  
3 400 help sources most often used in this study were the parental social network as well as information from  
4  
5 401 books and the internet.<sup>50, 65</sup> Accordingly, compared with formal help sources, informal help sources might  
6  
7 402 be more directly available and accessible for parents when they are seeking help for their children's  
8 403 socio-emotional development.<sup>64, 66</sup>  
9

10  
11 404 Timely parental help-seeking for the socio-emotional development of children is associated with a lower  
12 405 rate and lower severity of psychosocial problems in later life.<sup>1, 2, 5</sup> This study provides insight into parental  
13  
14 406 help-seeking when their children are very young. The findings indicated that parents of preschool children  
15 407 for example most frequently used help sources close by, such as family, whilst books and magazines  
16  
17 408 were less frequently utilized. In addition, investments might be made towards improving parents' access  
18  
19 409 to formal health care use for their children (e.g., provide the access to online consultation given by  
20 410 psychological professionals). Previous research has suggested, especially among non-native parents,  
21  
22 411 limited and difficult access to health care facilities.<sup>20, 67</sup> Longitudinal and experimental studies are  
23 412 recommended to examine the differential pathways between parent-perceived versus diagnosed child  
24  
25 413 psychosocial problems and the use of health care. A range of factors should be studied as contemplated  
26 414 by the Andersen model; taking into account access parents have to health care, but also barriers they  
27  
28 415 perceive to make use of health care. Qualitative and quantitative methods should be combined.  
29  
30 416 Regarding the BITSEA and subscales of the ITQOL-SF47 in this study, some coefficients of reliability  
31 417 were lower than the suggested guideline of 0.70, especially the interrater reliability correlations (0.3 and  
32  
33 418 0.17) of BITSEA. However, these reported low correlations were the correlations between parents and  
34 419 daycare teachers, which are typically lower than the correlations between parents.<sup>68</sup> We recommend  
35  
36 420 future studies to evaluate the reliability and repeated assessments especially in diverse samples to check  
37 421 the robustness of our findings.  
38

39  
40 422 The present study has several strengths. First, the longitudinal correlates between predisposing, enabling,  
41 423 and need factors and parental help-seeking were studied among a large community sample of parents  
42  
43 424 of 3-year-old children. Parental help-seeking for children under 4 years old is rarely studied.<sup>24, 25, 48</sup>  
44 425 Second, formal and informal help sources in parental help-seeking were included. Specifically, a broad  
45  
46 426 range of informal help sources, e.g., internet, books, complementary medicine and religious institutes  
47  
48 427 were assessed. Nevertheless, there were some limitations that need to be addressed. First, help-seeking  
49 428 for perceived social and emotional problems was parent-reported. Parents may have under- or  
50  
51 429 overestimated their child's socio-emotional development. The assessment focussed on parents'  
52 430 perceived socio-emotional problems contrary to a clinical diagnosis. In our analyses, we did correct for  
53  
54 431 risk of psychosocial problems at age 2-years, assessed by the BITSEA. A combination of clinical  
55 432 diagnose instruments, such as the Child Behavior Checklist (CBCL), with parent perceived problems may  
56  
57

1  
2  
3 433 contribute to a better understanding of parental help-seeking behavior.<sup>69</sup> Second, information on the help-  
4 seeking is self-reported and recall bias is possible; however, the one-year recall might have decreased  
5 434 recall inaccuracy.<sup>70</sup> Third, the multivariate regression analyses showed a slight difference between results  
6 435 conducted with the complete data and those with the imputed data. Therefore, we assessed the  
7 homogeneity of the above two datasets (Supplementary Table S6) and found no significant difference in  
8 436 the characteristics of the two populations ( $p>0.05$ ). Fourth, a limitation is the participation rate and the  
9 loss to follow-up in the present study. The participation rate was 25.9% which is lower than reported  
10 437 participation rates in large birth cohorts (around 30-40%).<sup>71</sup> We were not able to receive information from  
11 438 parents themselves as to why they refused to participate. Common reasons for non-participation are a  
12 lack of interest or a lack of time.<sup>72,73</sup> In addition, we cannot ascertain that all parents received the invitation  
13 439 to participate nor that they actually visited YHC at the child aged 2 years. Furthermore, the parents with  
14 440 a younger child, a Dutch ethnic background, an older age, and a higher education level were more likely  
15 to participate in the follow-up of the study. Consequently, the findings are applicable to the population  
16 441 under study. Regardless, efforts should be made to involve hard-to-reach populations in research studies.  
17 442 Finally, a lack of repeated measurements did not allow us to establish the causal association in the  
18 current study.  
19 443  
20  
21 444  
22 445  
23  
24 446  
25 447  
26  
27 448  
28  
29 449  
30

## 31 **Conclusion**

32 450  
33 451 The predisposing, enabling, and needs factors correlated with help-seeking by parents of preschool  
34 children with regard to their child's socio-emotional development were evaluated. The factors non-  
35 452 western ethnic background, younger age of the parent, previous help-seeking and specific discussions  
36 453 about the child's socio-emotional development during the well-child visit were associated with the  
37 presence of parental help-seeking. Parents reported using informal help sources more often than formal  
38 454 help sources. The findings can be used to further develop support for parents to access adequate  
39 information, prevention, and anticipatory care with regard to their child's socio-emotional development.  
40 455  
41 456  
42  
43 457  
44  
45  
46  
47  
48  
49  
50  
51  
52  
53  
54  
55  
56  
57  
58  
59  
60

## Footnotes

**Funding:** This work was supported by ZonMw, grant number 729301001. Jie Luo was funded by the Chinese Government Scholarship (CN), grant number 201806170061.

**Competing interests:** Non-financial associations that may be relevant to the submitted manuscript.

**Ethics approval:** The Medical Ethical Committee of the Erasmus Medical Center Rotterdam declared that the Medical Research Involving Human Subject Act (Dutch abbreviation WMO) did not apply to the present study and, subsequently, permission was given to carry out the study and to publish the results in scientific journals (number MEC-2014-152). This study was conducted by following the guidelines proposed in the World Medical Association Declaration of Helsinki.

**Contributors:** HR obtained the funding. HR, AG, and RB managed the research and undertook data collection. CBF, JL, AG, and HR conceived the research described in this paper. JL analyzed the data. All authors provided input in interpreting the data. JL drafted the manuscript with input of AG, CBF, HR and GB. All authors critically reviewed and approved the manuscript.

**Word Count:** 3981 words (excluding the title page, abstract, tables, footnotes and references)

**Data statement:** No additional data available

1  
2  
3  
4  
5  
6  
7  
8  
9  
10  
11  
12  
13  
14  
15  
16  
17  
18  
19  
20  
21  
22  
23  
24  
25  
26  
27  
28  
29  
30  
31  
32  
33  
34  
35  
36  
37  
38  
39  
40  
41  
42  
43  
44  
45  
46  
47  
48  
49  
50  
51  
52  
53  
54  
55  
56  
57  
58  
59  
60

474 Figure 1. Population of Analysis

For peer review only

## References

1. Egger HL, Angold A. Common emotional and behavioral disorders in preschool children: Presentation, nosology, and epidemiology. *J Child Psychol Psychiatry*. 2006;**47**:313-37. <https://doi.org/10.1111/j.1469-7610.2006.01618.x>
2. Kieling C, Baker-Henningham H, Belfer M, *et al*. Child and adolescent mental health worldwide: Evidence for action. *Lancet*. 2011;**378**:1515-25. [https://doi.org/10.1016/s0140-6736\(11\)60827-1](https://doi.org/10.1016/s0140-6736(11)60827-1)
3. Klitzing Kv, Döhnert M, Kroll M, *et al*. Mental disorders in early childhood. *Dtsch Arztebl International*. 2015;**112**:375-86. <https://doi.org/10.3238/arztebl.2015.03754496484>
4. Kariuki SM, Abubakar A, Kombe M, *et al*. Burden, risk factors, and comorbidities of behavioural and emotional problems in kenyan children: A population-based study. *Lancet Psychiatry*. 2017;**4**:136-45. [https://doi.org/10.1016/s2215-0366\(16\)30403-5PMC5285446](https://doi.org/10.1016/s2215-0366(16)30403-5PMC5285446)
5. Vitrikas K, Savard D, Bucaj M. Developmental delay: When and how to screen. *Am Fam Physician*. 2017;**96**:36-43
6. Wichstrøm L, Berg-Nielsen TS, Angold A, *et al*. Prevalence of psychiatric disorders in preschoolers. *J Child Psychol Psychiatry*. 2012;**53**:695-705. <https://doi.org/10.1111/j.1469-7610.2011.02514.x>
7. Skovgaard AM. Mental health problems and psychopathology in infancy and early childhood. *Dan Med Bull*. 2010;**57**:B4193
8. Anselmi L, Piccinini CA, Barros FC, *et al*. Psychosocial determinants of behaviour problems in brazilian preschool children. *Journal of Child Psychology and Psychiatry*. 2004;**45**:779-88. <https://doi.org/10.1111/j.1469-7610.2004.00271.x>
9. Hemmi MH, Wolke D, Schneider S. Associations between problems with crying, sleeping and/or feeding in infancy and long-term behavioural outcomes in childhood: A meta-analysis. *Arch Dis Child*. 2011;**96**:622. <https://doi.org/10.1136/adc.2010.191312>
10. Holtmann M, Buchmann AF, Esser G, *et al*. The child behavior checklist-dysregulation profile predicts substance use, suicidality, and functional impairment: A longitudinal analysis. *J Child Psychol Psychiatry*. 2011;**52**:139-47. <https://doi.org/10.1111/j.1469-7610.2010.02309.x>
11. O'Connor C, Reulbach U, Gavin B, *et al*. A prospective longitudinal investigation of the (dis)continuity of mental health difficulties between mid- to late-childhood and the predictive role of familial factors. *Eur Child Adolesc Psychiatry*. 2018;**27**:289-300. <https://doi.org/10.1007/s00787-017-1044-5>
12. Harrison JR, Vannest KJ, Reynolds CR. Social acceptability of five screening instruments for social, emotional, and behavioral challenges. *Behavioral Disorders*. 2013;**38**:171-89. [10.1177/019874291303800305](https://doi.org/10.1177/019874291303800305)
13. Malik F, Marwaha R. Developmental stages of social emotional development in children. Statpearls. Treasure Island (FL): StatPearls; 2018.
14. Letcher P, Smart D, Sanson A, *et al*. Psychosocial precursors and correlates of differing internalizing trajectories from 3 to 15 years 1. *Social Development*. 2009;**18**:618-46. <https://doi.org/10.1111/j.1467-9507.2008.00500.x>
15. Shaw DS, Lacourse E, Nagin DS. Developmental trajectories of conduct problems and hyperactivity from ages 2 to 10. *Journal of Child Psychology and Psychiatry*. 2005;**46**:931-42. <https://doi.org/10.1111/j.1469-7610.2004.00390.x>
16. Patel V, Kieling C, Maulik PK, *et al*. Improving access to care for children with mental disorders: A global perspective. *Arch Dis Child*. 2013;**98**:323-7. <https://doi.org/10.1136/archdischild-2012-3020793672840>
17. Johnston OG, Burke JD. Parental problem recognition and help-seeking for disruptive behavior disorders. *J Behav Health Serv Res*. 2020;**47**:146-63. <https://doi.org/10.1007/s11414-018-09648-y>
18. Thompson RA. Emotional regulation and emotional development. *Educ Psychol Rev*. 1991;**3**:269-307. <https://doi.org/10.1007/BF01319934>
19. Andersen RM. Revisiting the behavioral model and access to medical care: Does it matter? *J Health Soc Behav*. 1995:1-10. <https://doi.org/10.2307/2137284>

1  
2  
3  
4  
5  
6  
7  
8  
9  
10  
11  
12  
13  
14  
15  
16  
17  
18  
19  
20  
21  
22  
23  
24  
25  
26  
27  
28  
29  
30  
31  
32  
33  
34  
35  
36  
37  
38  
39  
40  
41  
42  
43  
44  
45  
46  
47  
48  
49  
50  
51  
52  
53  
54  
55  
56  
57  
58  
59  
60

20. Thurston IB, Hardin R, Decker K, *et al*. Black and white parents' willingness to seek help for children's internalizing and externalizing symptoms. *J Clin Psychol*. 2017;**74**:161-77.<https://doi.org/10.1002/jclp.22495>
21. Zwaanswijk M, Verhaak PF, Bensing JM, *et al*. Help seeking for emotional and behavioural problems in children and adolescents: A review of recent literature. *Eur Child Adolesc Psychiatry*. 2003;**12**:153-61.<https://doi.org/10.1007/s00787-003-0322-6>
22. Morawska A, Sultan A. Parental attitudes towards seeking professional help for their children: A community sample from the sultanate of oman. *Journal of Child and Family Studies*. 2016;**25**:979-87.<https://doi.org/10.1007/s10826-015-0257-9>
23. Alonso J, Little E. Parent help-seeking behaviour: Examining the impact of parent beliefs on professional help-seeking for child emotional and behavioural difficulties. *The Educational and Developmental Psychologist*. 2019;**36**:60-7.<https://doi.org/10.1017/edp.2019.8>
24. Reardon T, Harvey K, Creswell C. Seeking and accessing professional support for child anxiety in a community sample. *Eur Child Adolesc Psychiatry*. 2019;**29**:649-64.<https://doi.org/10.1007/s00787-019-01388-47250799>
25. Giron-Herrera E, Owens JS, Langberg JM. Perceived barriers to help-seeking among parents of at-risk kindergarteners in rural communities. *J Clin Child Adolesc Psychol*. 2013;**42**:68-77.<https://doi.org/10.1080/15374416.2012.715365>
26. Iskra W, Deane FP, Wahlin T, *et al*. Parental perceptions of barriers to mental health services for young people. *Early Interv Psychiatry*. 2015;**12**:125-34.<https://doi.org/10.1111/eip.12281>
27. Dempster R, Davis DW, Jones VF, *et al*. The role of stigma in parental help-seeking for perceived child behavior problems in urban, low-income african american parents. *J Clin Psychol Med Settings*. 2015;**22**:265-78.<https://doi.org/10.1007/s10880-015-9433-8>
28. Oh E, Bayer JK. Parents' help-seeking processes for early childhood mental health problems. *Child and Adolescent Mental Health*. 2015;**20**:149-54.<https://doi.org/10.1111/camh.12081>
29. Beyer T, Postert C, Müller JM, *et al*. Prognosis and continuity of child mental health problems from preschool to primary school: Results of a four-year longitudinal study. *Child Psychiatry Hum Dev*. 2012;**43**:533-43.<https://doi.org/10.1007/s10578-012-0282-5>
30. Verhulst FC, van der Ende J. Factors associated with child mental health service use in the community. *J Am Acad Child Adolesc Psychiatry*. 1997;**36**:901-9.<http://doi.org/10.1097/00004583-199707000-00011>
31. Oudhof M, MS de Wolff, M. de Ruiters, M. Kamphuis, MP L'Hoir and B. Prinsen. Jgz richtlijn opvoedingsondersteuning voor hulp bij opvoedingsvragen en lichte opvoedproblemen. Utrecht, the Netherlands: Nederland Centrum Jeugdgezondheid (NCJ); 2013.
32. Annual report on integration 2018. The Hague, the Netherlands: Statistics Netherlands; 2018.
33. Standaard onderwijsindeling 2016. Den Haag, the Netherlands: Statistics Netherlands, 2018.
34. Briggs-Gowan MJ, Carter AS. Social-emotional screening status in early childhood predicts elementary school outcomes. *Pediatrics*. 2008;**121**:957-62.<https://doi.org/10.1542/peds.2007-19483088107>
35. Kruizinga I, Jansen W, De Haan CL, *et al*. Reliability and validity of the dutch version of the bitsea. *PLoS One*. 2012;**7**:e38762.<https://doi.org/10.1371/journal.pone.00387623371000>
36. Briggs-Gowan MJ, Carter AS, Irwin JR, *et al*. The brief infant-toddler social and emotional assessment: Screening for social-emotional problems and delays in competence. *J Pediatr Psychol*. 2004;**29**:143-55.<https://doi.org/10.1093/jpepsy/jsh017>
37. Kruizinga I, Jansen W, De Haan CL, *et al*. Reliability and validity of the dutch version of the bitsea. 2012;**7**
38. Landgraf JM, Vogel I, Oostenbrink R, *et al*. Parent-reported health outcomes in infants/toddlers: Measurement properties and clinical validity of the itqol-sf47. *Qual Life Res*. 2013;**22**:635-46.<https://doi.org/10.1007/s11136-012-0177-8>



- 1  
2  
3 574 39. Raat H, Landgraf JM, Oostenbrink R, *et al.* Reliability and validity of the infant and toddler quality  
4 575 of life questionnaire (itqol) in a general population and respiratory disease sample. *Qual Life Res.*  
5 576 2007;**16**:445-60.<https://doi.org/10.1007/s11136-006-9134-82792359>  
6 577 40. Raat H, Landgraf JM, Oostenbrink R, *et al.* Reliability and validity of the infant and toddler quality  
7 578 of life questionnaire (itqol) in a general population and respiratory disease sample. *Quality of Life*  
8 579 *Research.* 2007;**16**:445-60  
9 580 41. Maroof DA. Binary logistic regression. In: Maroof DA, editor. *Statistical methods in*  
10 581 *neuropsychology: Common procedures made comprehensible.* Boston, MA: Springer US; 2012. p. 67-  
11 582 75.  
12 583 42. Liu Y, De A. Multiple imputation by fully conditional specification for dealing with missing data in  
13 584 a large epidemiologic study. *International journal of statistics in medical research.*  
14 585 2015;**4**:287.<https://doi.org/10.6000/1929-6029.2015.04.03.74945131>  
15 586 43. Andersen R, Newman JF. Societal and individual determinants of medical care utilization in the  
16 587 united states. *The Milbank Memorial Fund Quarterly Health and Society.* 1973;**51**:95-  
17 588 124.<http://doi.org/10.2307/3349613>  
18 589 44. Bussing R, Zima BT, Gary FA, *et al.* Barriers to detection, help-seeking, and service use for  
19 590 children with adhd symptoms. *The Journal of Behavioral Health Services & Research.* 2003;**30**:176-  
20 591 89.<https://doi.org/10.1007/BF02289806>  
21 592 45. Alegria M, Canino G, Lai S, *et al.* Understanding caregivers' help-seeking for latino children's  
22 593 mental health care use. *Med Care.* 2004;**42**:447-55.<https://doi.org/10.1097/01.mlr.0000124248.64190.56>  
23 594 46. Verhulp EE, Stevens GWJM, van de Schoot R, *et al.* Understanding ethnic differences in mental  
24 595 health service use for adolescents' internalizing problems: The role of emotional problem identification.  
25 596 *Eur Child Adolesc Psychiatry.* 2013;**22**:413-21.<https://doi.org/10.1007/s00787-013-0380-3>  
26 597 47. Reardon T, Harvey K, Baranowska M, *et al.* What do parents perceive are the barriers and  
27 598 facilitators to accessing psychological treatment for mental health problems in children and adolescents?  
28 599 A systematic review of qualitative and quantitative studies. *Eur Child Adolesc Psychiatry.* 2017;**26**:623-  
29 600 47.<https://doi.org/10.1007/s00787-016-0930-6PMC5446558>  
30 601 48. Zwaanswijk M, van der Ende J, Verhaak PF, *et al.* Help-seeking for child psychopathology:  
31 602 Pathways to informal and professional services in the netherlands. *J Am Acad Child Adolesc Psychiatry.*  
32 603 2005;**44**:1292-300.<https://doi.org/10.1097/01.chi.0000181038.98712.c6>  
33 604 49. Shanley DC, Reid GJ, Evans B. How parents seek help for children with mental health problems.  
34 605 *Administration and Policy in Mental Health and Mental Health Services Research.* 2008;**35**:135-  
35 606 46.<https://doi.org/10.1007/s10488-006-0107-6>  
36 607 50. Giallo R, Dunning M, Gent A. Attitudinal barriers to help-seeking and preferences for mental  
37 608 health support among australian fathers. *J Reprod Infant Psychol.* 2017;**35**:236-  
38 609 47.<https://doi.org/10.1080/02646838.2017.1298084>  
39 610 51. Zimmerman FJ. Social and economic determinants of disparities in professional help - seeking  
40 611 for child mental health problems: Evidence from a national sample. *Health Serv Res.* 2005;**40**:1514-  
41 612 33.<https://doi.org/10.1111/j.1475-6773.2005.00411.x1361199>  
42 613 52. Kroneman M, Boerma W, van den Berg M, *et al.* The netherlands: Health system review. *Health*  
43 614 *Syst Transit.* 2016;**18**:1-240  
44 615 53. van Weel C, Schers H, Timmermans A. Health care in the netherlands. *The Journal of the*  
45 616 *American Board of Family Medicine.* 2012;**25**:S12-S7.<https://doi.org/10.3122/jabfm.2012.02.110212>  
46 617 54. Verbrugge HPJP. Youth health care in the netherlands: A bird's eye view. 1990;**86**:1044-7  
47 618 55. Goldfeld SR, Wright M, Oberklaid F. Parents, infants and health care: Utilization of health services  
48 619 in the first 12months of life. *J Paediatr Child Health.* 2003;**39**:249-53.<https://doi.org/10.1046/j.1440-1754.2003.00146.x>  
49 620 56. Hanna BA, Edgecombe G, Jackson CA, *et al.* The importance of first-time parent groups for new  
50 621 parents. *Nurs Health Sci.* 2002;**4**:209-14.<https://doi.org/10.1046/j.1442-2018.2002.00128.x>  
51 622  
52  
53  
54  
55  
56  
57  
58  
59  
60

1

2

3 623 57. Zahner GE, Daskalakis C. Factors associated with mental health, general health, and school-  
4 624 based service use for child psychopathology. *Am J Public Health*. 1997;**87**:1440-  
5 625 8.<https://doi.org/10.2105/ajph.87.9.1440>

6 626 58. Sawyer MG, Miller-Lewis LR, Clark JJ. The mental health of 13–17 year-olds in australia: Findings  
7 627 from the national survey of mental health and well-being. *J Youth Adolesc*. 2007;**36**:185-  
8 628 94.<https://doi.org/10.1007/s10964-006-9122-x>

9 629 59. Turner EA, Mohan S. Child mental health services and psychotherapy attitudes among asian  
10 630 indian parents: An exploratory study. *Community Ment Health J*. 2016;**52**:989-  
11 631 97.<https://doi.org/10.1007/s10597-015-9976-z>

12 632 60. Costello EJ, Mustillo S, Erkanli A, *et al*. Prevalence and development of psychiatric disorders in  
13 633 childhood and adolescence. *Arch Gen Psychiatry*. 2003;**60**:837-  
14 634 44.<https://doi.org/10.1001/archpsyc.60.8.837>

15 635 61. Alexander KE, Brijnath B, Mazza D. 'Can they really identify mental health problems at the age of  
16 636 three?' parent and practitioner views about screening young children's social and emotional development.  
17 637 *Aust N Z J Psychiatry*. 2013;**47**:538-45.<https://doi.org/10.1177/0004867413476756>

18 638 62. Woolfenden S, Eapen V, Williams K, *et al*. A systematic review of the prevalence of parental  
19 639 concerns measured by the parents' evaluation of developmental status (peds) indicating developmental  
20 640 risk. *BMC Pediatr*. 2014;**14**:231.<http://doi.org/10.1186/1471-2431-14-231>

21 641 63. Coker TR, Shaikh Y, Chung PJ. Parent-reported quality of preventive care for children at-risk for  
22 642 developmental delay. *Acad Pediatr*. 2012;**12**:384-90.<https://doi.org/10.1016/j.acap.2012.05.003>

23 643 64. Raviv A, Sharvit K, Raviv A, *et al*. Mothers' and fathers' reluctance to seek psychological help for  
24 644 their children. *Journal of Child and Family Studies*. 2009;**18**:151.<https://doi.org/10.1007/s10826-008-9215-0>

25 645 65. Mitchell RE, Trickett EJ. Task force report: Social networks as mediators of social support.  
26 646 *Community Ment Health J*. 1980;**16**:27-44.<https://doi.org/10.1007/BF00780665>

27 647 66. Murry VM, Heflinger CA, Suiter SV, *et al*. Examining perceptions about mental health care and  
28 648 help-seeking among rural african american families of adolescents. *J Youth Adolesc*. 2011;**40**:1118-  
29 649 31.<https://doi.org/10.1007/s10964-010-9627-1>

30 650 67. Karim N, Boyle B, Lohan M, *et al*. Immigrant parents' experiences of accessing child healthcare  
31 651 services in a host country: A qualitative thematic synthesis. *J Adv Nurs*.  
32 652 2020.<https://doi.org/10.1111/jan.14358>

33 653 68. Achenbach TM, McConaughy SH, Howell CT. Child/adolescent behavioral and emotional  
34 654 problems: Implications of cross-informant correlations for situational specificity. *Psychol Bull*.  
35 655 1987;**101**:213.<https://doi.org/10.1037/0033-2909.101.2.213>

36 656 69. Achenbach TM. The child behavior checklist and related instruments. 1999

37 657 70. Coughlin SS. Recall bias in epidemiologic studies. *J Clin Epidemiol*. 1990;**43**:87-  
38 658 91.[https://doi.org/10.1016/0895-4356\(90\)90060-3](https://doi.org/10.1016/0895-4356(90)90060-3)

39 659 71. Nohr EA, Frydenberg M, Henriksen TB, *et al*. Does low participation in cohort studies induce bias?  
40 660 *Epidemiology*. 2006:413-8.<http://doi.org/10.1097/01.ede.0000220549.14177.60>

41 661 72. Elemraid M, Pollard K, Thomas M, *et al*. Parental decisions on children participating in research.  
42 662 *Nurs Child Young People*. 2013;**25**:16-21

43 663 73. Levickis P, Naughton G, Gerner B, *et al*. Why families choose not to participate in research:  
44 664 Feedback from non-responders. *J Paediatr Child Health*. 2013;**49**:57-  
45 665 62.<https://doi.org/10.1111/jpc.12020>

46 666  
47 667  
48  
49

50

51

52

53

54

55

56

57

58

59

60

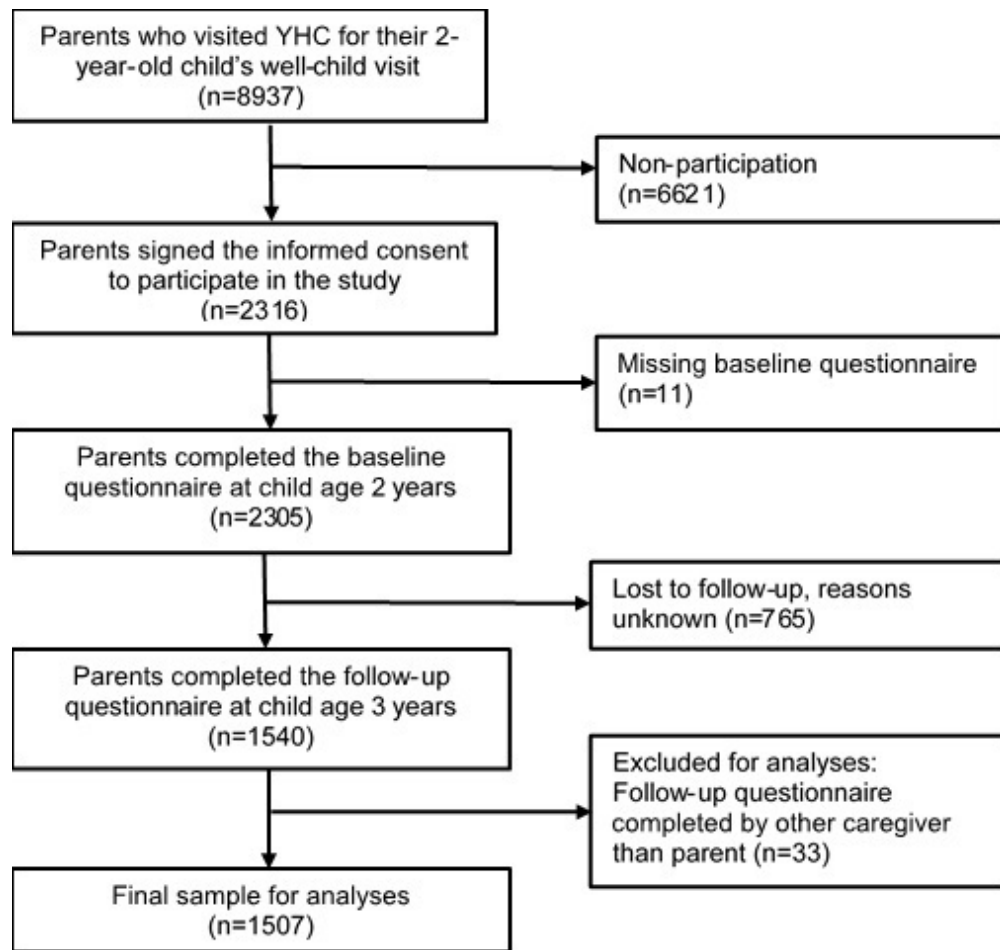

Figure 1. Population of Analysis

42x46mm (300 x 300 DPI)

1  
2  
3  
4 **Supplementary Materials [Tables]**  
5  
6  
7

8 **Title:** Correlates of help-seeking by parents for the socio-emotional development of their 3-year-old  
9 children: a longitudinal study.  
10  
11

12  
13 **Journal:** BMJ Open  
14

15  
16 **Authors:** Jie Luo, Hein Raat, Carmen B. Franse, Rienke Bannink, Guannan Bai, Amy van Grieken  
17

18 **Corresponding Author:** Amy van Grieken, PhD, Department of Public Health, Erasmus University  
19 Medical Center, P.O. Box 2040, 3000 CA Rotterdam, The Netherlands, a.vangrieken@erasmusmc.nl.  
20  
21  
22  
23  
24  
25  
26  
27  
28  
29  
30  
31  
32  
33  
34  
35  
36  
37  
38  
39  
40  
41  
42  
43  
44  
45  
46  
47  
48  
49  
50  
51  
52  
53  
54  
55  
56  
57  
58  
59  
60

Supplementary Table S1. *P*-values for interactions between the 13 factors and child gender, child ethnic background, parental age and parental education level on help-seeking (n=1507)

|                                                                          | Child gender   | Child ethnic background | Parental age   | Parental education level |
|--------------------------------------------------------------------------|----------------|-------------------------|----------------|--------------------------|
|                                                                          | <i>p</i> value | <i>p</i> value          | <i>p</i> value | <i>p</i> value           |
| Child gender                                                             | -              | 0.877                   | 0.537          | 0.751                    |
| Child ethnic background                                                  | 0.877          | -                       | 0.049          | 0.981                    |
| Parental age                                                             | 0.537          | 0.049                   | -              | 0.829                    |
| Parental education level                                                 | 0.751          | 0.981                   | 0.829          | -                        |
| Parental work status                                                     | 0.325          | 0.909                   | 0.841          | 0.069                    |
| Family composition                                                       | 0.226          | 0.078                   | 0.887          | 0.194                    |
| BITSEA Problem scale score                                               | 0.419          | 0.373                   | 0.074          | 0.969                    |
| BITSEA Competence scale score                                            | 0.414          | 0.853                   | 0.406          | 0.100                    |
| Stressful life events                                                    | 0.003          | 0.518                   | 0.786          | 0.033                    |
| General health of the child                                              | 0.893          | 0.171                   | 0.442          | 0.271                    |
| Parental satisfaction of child's development                             | 0.446          | 0.307                   | 0.350          | 0.347                    |
| Previous help-seeking behavior                                           | 0.274          | 0.619                   | 0.159          | 0.567                    |
| Discussion of child social-emotional development in the well-child visit | 0.552          | 0.193                   | 0.126          | 0.731                    |

Note: numbers in table are *p*-values of interaction of the variables in rows and columns.

Abbreviations: BITSEA= Brief Infant–Toddler Social and Emotional Assessment.

Multivariate logistic regression was adopted for interaction analyses in the full model with predisposing variables, enabling variables and need variables as independent variables. After applying Bonferroni correction for multiple testing ( $P=0.05/42=0.001$ ), no statistically significant interaction was found.

Supplementary Table S2. Non-response analyses (n = 2305)

|                          | Total<br>(n=2305)<br>Mean ± SD N(%) | Response to follow-up              |                                      | p value |
|--------------------------|-------------------------------------|------------------------------------|--------------------------------------|---------|
|                          |                                     | No<br>(n=765)<br>Mean ± SD<br>N(%) | Yes<br>(n=1540)<br>Mean ± SD<br>N(%) |         |
| Child age in months      | 24.6±1.8                            | 24.8±1.6                           | 24.5±1.8                             | <0.001  |
| Child gender             |                                     |                                    |                                      | 0.155   |
| Boy                      | 1159 (50.6)                         | 401 (52.7)                         | 758 (49.5)                           |         |
| Girl                     | 1132 (49.4)                         | 360 (47.3)                         | 772 (50.5)                           |         |
| Child ethnic background  |                                     |                                    |                                      | <0.001  |
| Dutch                    | 1576 (73.3)                         | 415 (58.9)                         | 1161 (80.2)                          |         |
| Other western            | 166 (7.7)                           | 59 (8.4)                           | 107 (7.4)                            |         |
| Non-western              | 409 (19.0)                          | 230 (32.7)                         | 179 (12.4)                           |         |
| Parental age in year     |                                     |                                    |                                      | <0.001  |
| >=40                     | 262 (22.6)                          | 89 (11.8)                          | 173 (11.3)                           |         |
| 30-39                    | 1500 (65.9)                         | 438 (58.2)                         | 1062 (69.6)                          |         |
| =<29                     | 515 (11.5)                          | 225 (29.9)                         | 290 (19.0)                           |         |
| Parental education level |                                     |                                    |                                      | <0.001  |
| High                     | 1175 (52.8)                         | 282 (39.1)                         | 893 (59.5)                           |         |
| Middle                   | 858 (38.6)                          | 345 (47.8)                         | 513 (34.2)                           |         |
| Low                      | 191 (8.6)                           | 95 (13.2)                          | 96 (6.4)                             |         |

Note: This table present non-imputed data. The missing numbers of variables are child age (n=32), child gender (n=16), child ethnic background (n=165), parental age (n=39), parental educational level (n=92).

Abbreviation: SD=standard deviation.

P values are based on Independent t-test and chi-square test for non-response to follow-up and response groups.

Supplementary Table S3. McNemar's test for homogeneity of formal sources use and informal sources use (n=341)

|                           | Informal sources use |              | p value |
|---------------------------|----------------------|--------------|---------|
|                           | Yes<br>(n=264)       | No<br>(n=77) |         |
| <b>Formal sources use</b> |                      |              |         |
| Yes (n=103)               | 26                   | 77           | <0.001  |
| No (n=238)                | 238                  | 0            |         |

P value is based on the McNemar's test.

Supplementary Table S4. Characteristics of the study population by use of formal and informal sources in parental help-seeking (n=1507)

|                               | Total                         | Use of formal sources               |                                     | p value | Use of Informal sources             |                                     | p value |
|-------------------------------|-------------------------------|-------------------------------------|-------------------------------------|---------|-------------------------------------|-------------------------------------|---------|
|                               | (n=1507)<br>Mean ± SD<br>N(%) | No<br>(n=1404)<br>Mean ± SD<br>N(%) | Yes<br>(n=103)<br>Mean ± SD<br>N(%) |         | No<br>(n=1243)<br>Mean ± SD<br>N(%) | Yes<br>(n=264)<br>Mean ± SD<br>N(%) |         |
| <b>Predisposing Factors</b>   |                               |                                     |                                     |         |                                     |                                     |         |
| Child age in month            | 24.5±1.8                      | 24.5±1.9                            | 24.5±1.6                            | 0.920   | 24.5±1.8                            | 24.5±2.0                            | 0.593   |
| Child gender                  |                               |                                     |                                     | 0.029   |                                     |                                     | 0.648   |
| Boys                          | 739 (49.4)                    | 678 (48.6)                          | 61 (59.8)                           |         | 614 (49.6)                          | 125 (48.1)                          |         |
| Girls                         | 758 (50.6)                    | 717 (51.4)                          | 41 (40.2)                           |         | 623 (50.4)                          | 135 (51.9)                          |         |
| Child ethnic background       |                               |                                     |                                     | 0.020   |                                     |                                     | 0.508   |
| Dutch                         | 1161 (80.2)                   | 1093 (81.0)                         | 68 (69.4)                           |         | 966 (80.8)                          | 195 (77.7)                          |         |
| Other western                 | 107 (7.4)                     | 96 (7.1)                            | 11 (11.2)                           |         | 85 (7.1)                            | 22 (8.8)                            |         |
| Non-western                   | 179 (12.4)                    | 160 (11.9)                          | 19 (19.4)                           |         | 145 (12.1)                          | 34 (13.5)                           |         |
| Parental age in year          |                               |                                     |                                     | 0.285   |                                     |                                     | 0.001   |
| ≥40                           | 166 (11.1)                    | 155 (11.1)                          | 11 (10.9)                           |         | 149 (12.1)                          | 17 (6.5)                            |         |
| 30-39                         | 1048 (70.1)                   | 983 (70.5)                          | 65 (64.4)                           |         | 870 (70.6)                          | 178 (67.7)                          |         |
| =<29                          | 282 (18.9)                    | 257 (18.4)                          | 25 (24.8)                           |         | 214 (17.4)                          | 68 (25.9)                           |         |
| <b>Enabling Factors</b>       |                               |                                     |                                     |         |                                     |                                     |         |
| Parental education level      |                               |                                     |                                     | 0.001   |                                     |                                     | 0.170   |
| High                          | 883 (59.9)                    | 841 (61.1)                          | 42 (43.3)                           |         | 740 (61.1)                          | 143 (54.8)                          |         |
| Middle                        | 498 (33.8)                    | 449 (32.6)                          | 49 (50.5)                           |         | 399 (32.9)                          | 99 (37.9)                           |         |
| Low                           | 92 (6.2)                      | 86 (6.3)                            | 6 (6.2)                             |         | 73 (6.0)                            | 19 (7.3)                            |         |
| Parental work status          |                               |                                     |                                     | 0.006   |                                     |                                     | 0.015   |
| Employed                      | 1213(81.2)                    | 1125 (82.5)                         | 70 (71.4)                           |         | 996 (82.9)                          | 199 (76.5)                          |         |
| Unemployed                    | 280 (18.8)                    | 238 (17.5)                          | 28 (28.6)                           |         | 205 (17.1)                          | 61 (23.5)                           |         |
| Family composition            |                               |                                     |                                     | 0.210   |                                     |                                     | 0.054   |
| Two-parent family             | 1386 (93.8)                   | 1297 (94.0)                         | 89 (90.8)                           |         | 1149 (94.3 )                        | 237 (91.2)                          |         |
| Single-parent family          | 92 (6.2)                      | 83 (6.0)                            | 9 (9.2)                             |         | 69 (5.7)                            | 23 (8.8)                            |         |
| <b>Need Factors</b>           |                               |                                     |                                     |         |                                     |                                     |         |
| BITSEA Problem scale score    |                               |                                     |                                     | <0.001  |                                     |                                     | 0.021   |
| No risk                       | 1400 (94.0)                   | 1319 (95.0)                         | 81 (80.2)                           |         | 1161 (94.6)                         | 239 (90.9)                          |         |
| At risk                       | 92 (6.0)                      | 70 (5.0)                            | 20 (19.8)                           |         | 66 (5.4)                            | 24 (9.1)                            |         |
| BITSEA Competence scale score |                               |                                     |                                     | 0.001   |                                     |                                     | 0.352   |
| No risk                       | 1300 (88.0)                   | 1222 (88.7)                         | 78 (77.2)                           |         | 1074 (88.3)                         | 226 (86.3)                          |         |
| At risk                       | 178 (12.0)                    | 155(11.3)                           | 23(22.8)                            |         | 142 (11.7)                          | 36 (13.7)                           |         |

1  
2  
3  
4  
5  
6  
7  
8  
9  
10  
11  
12  
13  
14  
15  
16  
17  
18  
19  
20  
21  
22  
23  
24  
25  
26  
27  
28  
29  
30  
31  
32  
33  
34  
35  
36  
37  
38  
39  
40  
41  
42  
43  
44  
45  
46  
47  
48  
49  
50  
51  
52  
53  
54  
55  
56  
57  
58  
59  
60

|                                                                         |             |             |           |        |             |            |        |
|-------------------------------------------------------------------------|-------------|-------------|-----------|--------|-------------|------------|--------|
| Stressful life events                                                   |             |             |           | 0.048  |             |            | 0.001  |
| No                                                                      | 749 (51.0)  | 708 (51.7)  | 41 (41.4) |        | 641 (53.0)  | 108 (41.7) |        |
| Yes                                                                     | 720 (49.0)  | 662 (48.3)  | 58 (58.6) |        | 569 (47.0)  | 151 (58.3) |        |
| General health of the child <sup>a</sup>                                |             |             |           | 0.007  |             |            | 0.153  |
| Good                                                                    | 1370 (92.2) | 1283(92.7)  | 87 (85.3) |        | 1135 (92.7) | 235 (90.0) |        |
| Poor                                                                    | 116 (7.8)   | 101 (7.3)   | 15 (14.7) |        | 90 (7.3)    | 26 (10.0)  |        |
| Parental satisfaction of child's development <sup>b</sup>               |             |             |           | <0.001 |             |            | 0.366  |
| Yes                                                                     | 1380 (94.7) | 1297(95.6)  | 83 (81.4) |        | 1135 (94.9) | 245 (93.5) |        |
| No                                                                      | 78 (5.3)    | 59(4.4)     | 19 (18.6) |        | 61 (5.1)    | 17 (6.5)   |        |
| Previous help-seeking                                                   |             |             |           | <0.001 |             |            | <0.001 |
| No                                                                      | 1208 (82.2) | 1151 (83.9) | 57 (58.8) |        | 1039 (85.8) | 169 (65.5) |        |
| Yes                                                                     | 261 (17.8)  | 221 (16.1)  | 40 (41.2) |        | 172 (14.2)  | 89 (34.5)  |        |
| Discussion of child socio-emotional development in the well-child visit |             |             |           | <0.001 |             |            | <0.001 |
| No                                                                      | 1196 (85.6) | 1148 (88.0) | 48 (52.2) |        | 1017 (87.6) | 179 (75.8) |        |
| Yes                                                                     | 201 (14.4)  | 157 (12.0)  | 44 (47.8) |        | 144 (12.4)  | 57 (24.2)  |        |

Note: This table presents non-imputed data. The missing numbers of variables are parental age (n=11), child gender (n=10), child ethnic background (n=60), parental educational level (n=34), parental work status (n=46), family composition (n=29), BITSEA Problem scale score (n=17), BITSEA Competence scale score (n=29), stressful life events (n=38), general health of the child (n=21), parental satisfaction of child's development (n=49), previous help-seeking (n=38), and discussion of child socio-emotional development in the well-child visit (n=110).

Data presented as mean  $\pm$  SD or number (percentage). Significant differences between two subgroups of help-seeking and non-help-seeking parents were evaluated at 0.05 level using independent T tests for continuous variables and  $\chi^2$  tests for categorical variables.

a. General health of the child was measured by the 4-item subscale General Health of the Infant Toddler Quality of Life Questionnaire (47 items).

b. Parental satisfaction of child's development was measured by the 5-item subscale Satisfaction of Child's Development of the Infant Toddler Quality of Life Questionnaire (47 items).

Abbreviation: SD=standard deviation; BITSEA= Brief Infant-Toddler Social and Emotional Assessment.

The bold print indicates  $p < 0.05$ .



Supplementary Table S5. Multivariate logistic regression model on independent factors and help-seeking with complete data (n=1168)

|                               | <b>Model 1</b>         |           | <b>Model 2</b>          |           | <b>Model 3</b>      |           |
|-------------------------------|------------------------|-----------|-------------------------|-----------|---------------------|-----------|
|                               | Predisposing variables |           | Plus enabling variables |           | Plus need variables |           |
|                               | $\chi^2 = 22.08$       |           | $\chi^2 = 14.11$        |           | $\chi^2 = 93.56$    |           |
|                               | OR                     | 95% CI    | OR                      | 95% CI    | OR                  | 95% CI    |
| <b>Predisposing Factors</b>   |                        |           |                         |           |                     |           |
| Child gender                  |                        |           |                         |           |                     |           |
| Boy                           | Ref                    |           | Ref                     |           | Ref                 |           |
| Girl                          | 0.86                   | 0.65-1.14 | 0.86                    | 0.65-1.14 | 0.93                | 0.69-1.25 |
| Child ethnic background       |                        |           |                         |           |                     |           |
| Dutch                         | Ref                    |           | Ref                     |           | Ref                 |           |
| Other western                 | 1.51                   | 0.90-2.54 | 1.45                    | 0.86-2.44 | 1.51                | 0.87-2.63 |
| Non-western                   | 1.52                   | 1.00-2.33 | 1.21                    | 0.77-1.90 | 1.18                | 0.72-1.91 |
| Parental age in year          |                        |           |                         |           |                     |           |
| $\geq 40$                     | Ref                    |           | Ref                     |           | Ref                 |           |
| 30-39                         | 1.67                   | 0.97-2.88 | 1.72                    | 0.99-2.96 | 1.51                | 0.86-2.65 |
| $< 29$                        | 2.87***                | 1.59-5.18 | 2.53**                  | 1.39-4.59 | 2.23*               | 1.20-4.15 |
| <b>Enabling Factors</b>       |                        |           |                         |           |                     |           |
| Parental education level      |                        |           |                         |           |                     |           |
| High                          |                        |           | Ref                     |           | Ref                 |           |
| Middle                        |                        |           | 1.27                    | 0.93-1.73 | 1.24                | 0.89-1.71 |
| Low                           |                        |           | 1.00                    | 0.52-1.94 | 0.93                | 0.46-1.87 |
| Parental work status          |                        |           |                         |           |                     |           |
| Employed                      |                        |           | Ref                     |           | Ref                 |           |
| Unemployed                    |                        |           | 1.59*                   | 1.11-2.27 | 1.32                | 0.90-1.95 |
| Family composition            |                        |           |                         |           |                     |           |
| Two-parent family             |                        |           | Ref                     |           | Ref                 |           |
| Single-parent family          |                        |           | 1.66                    | 0.91-3.03 | 1.46                | 0.77-2.75 |
| <b>Need Factors</b>           |                        |           |                         |           |                     |           |
| BITSEA Problem scale score    |                        |           |                         |           |                     |           |
| No risk                       |                        |           |                         |           | Ref                 |           |
| At risk                       |                        |           |                         |           | 0.96                | 0.51-1.81 |
| BITSEA Competence scale score |                        |           |                         |           |                     |           |
| No risk                       |                        |           |                         |           | Ref                 |           |
| At risk                       |                        |           |                         |           | 1.35                | 0.85-2.14 |

1  
2  
3  
4  
5  
6  
7  
8  
9  
10  
11  
12  
13  
14  
15  
16  
17  
18  
19  
20  
21  
22  
23  
24  
25  
26  
27  
28  
29  
30  
31  
32  
33  
34  
35  
36  
37  
38  
39  
40  
41  
42  
43  
44  
45  
46  
47  
48  
49  
50  
51  
52  
53  
54  
55  
56  
57  
58  
59  
60

|                                                                              |  |         |           |
|------------------------------------------------------------------------------|--|---------|-----------|
| Stressful life events                                                        |  |         |           |
| No                                                                           |  | Ref     |           |
| Yes                                                                          |  | 1.45*   | 1.07-1.96 |
| General health of the child <sup>a</sup>                                     |  |         |           |
| Good                                                                         |  | Ref     |           |
| Poor                                                                         |  | 1.25    | 0.73-2.14 |
| Parental satisfaction of child's development <sup>b</sup>                    |  |         |           |
| Yes                                                                          |  | Ref     |           |
| No                                                                           |  | 1.58    | 0.81-3.09 |
| Previous help-seeking                                                        |  |         |           |
| No                                                                           |  | Ref     |           |
| Yes                                                                          |  | 2.71*** | 1.90-3.88 |
| Discussion of child social and emotional development in the well-child visit |  |         |           |
| No                                                                           |  | Ref     |           |
| Yes                                                                          |  | 2.67*** | 1.82-3.92 |

Model 1: The model with predisposing factors as independent variables.

Model 2: The model with predisposing and enabling factors as independent variables.

Model 3: The full model with predisposing, enabling, and need factors as independent variables.

a. General health of the child was measured by the 4-item subscale General Health of the Infant Toddler Quality of Life Questionnaire (47 items).

b. Parental satisfaction of child's development was measured by the 5-item subscale Satisfaction of Child's Development of the Infant Toddler Quality of Life Questionnaire (47 items).

Abbreviation: OR=Odds Ratio; CI=Confidence Interval; BITSEA= Brief Infant-Toddler Social and Emotional Assessment.

\*  $p < 0.05$ ; \*\*  $p < 0.01$ ; \*\*\*  $p < 0.001$ .

Supplementary Table S6. Chi-square test for homogeneity of complete data and imputed data

|                                          | Complete data<br>(n=1168)<br>N(%) | Imputed data<br>(n=1507)<br>N(%) | p value |
|------------------------------------------|-----------------------------------|----------------------------------|---------|
| <b><i>Predisposing Factors</i></b>       |                                   |                                  |         |
| Child gender                             |                                   |                                  |         |
| Boy                                      | 569 (48.7)                        | 744 (49.4)                       | 0.737   |
| Girl                                     | 599 (51.3)                        | 763 (50.6)                       |         |
| Child ethnic background                  |                                   |                                  |         |
| Dutch                                    | 959 (82.1)                        | 1202(79.8)                       | 0.260   |
| Other western                            | 83 (7.1)                          | 113 (7.5)                        |         |
| Non-western                              | 126 (10.8)                        | 192 (12.7)                       |         |
| Parental age in year                     |                                   |                                  |         |
| >=40                                     | 123 (10.5)                        | 167 (11.1)                       | 0.899   |
| 30-39                                    | 825 (70.6)                        | 1056 (70.1)                      |         |
| =<29                                     | 220 (18.8)                        | 284 (18.8)                       |         |
| <b><i>Enabling Factors</i></b>           |                                   |                                  |         |
| Parental education level                 |                                   |                                  |         |
| High                                     | 717 (61.4)                        | 901 (59.8)                       | 0.394   |
| Middle                                   | 391 (33.5)                        | 511 (33.9)                       |         |
| Low                                      | 60 (5.1)                          | 95 (6.3)                         |         |
| Parental work status                     |                                   |                                  |         |
| Employed                                 | 958 (82.0)                        | 1227 (81.4)                      | 0.690   |
| Unemployed                               | 210 (18.0)                        | 280 (18.6)                       |         |
| Family composition                       |                                   |                                  |         |
| Two-parent family                        | 1111 (95.1)                       | 1407 (93.4)                      | 0.055   |
| Single-parent family                     | 57 (4.9)                          | 100 (6.6)                        |         |
| <b><i>Need Factors</i></b>               |                                   |                                  |         |
| BITSEA Problem scale score               |                                   |                                  |         |
| No risk                                  | 1103 (94.4)                       | 1411 (93.6)                      | 0.385   |
| At risk                                  | 65 (5.6)                          | 96 (6.4)                         |         |
| BITSEA Competence scale score            |                                   |                                  |         |
| No risk                                  | 1045 (89.5)                       | 1318 (87.5)                      | 0.108   |
| At risk                                  | 123 (10.5)                        | 189 (12.5)                       |         |
| Stressful life events                    |                                   |                                  |         |
| No                                       | 606 (51.9)                        | 769 (51.0)                       | 0.661   |
| Yes                                      | 562(48.1)                         | 738 (49.0)                       |         |
| General health of the child <sup>a</sup> |                                   |                                  |         |
| Good                                     | 1081 (92.6)                       | 1390 (92.2)                      | 0.761   |

1  
2  
3  
4  
5  
6  
7  
8  
9  
10  
11  
12  
13  
14  
15  
16  
17  
18  
19  
20  
21  
22  
23  
24  
25  
26  
27  
28  
29  
30  
31  
32  
33  
34  
35  
36  
37  
38  
39  
40  
41  
42  
43  
44  
45  
46  
47  
48  
49  
50  
51  
52  
53  
54  
55  
56  
57  
58  
59  
60

|                                                                              |             |             |       |
|------------------------------------------------------------------------------|-------------|-------------|-------|
| Poor                                                                         | 87 (7.4)    | 117 (7.8)   |       |
| Parental satisfaction of child's development <sup>b</sup>                    |             |             |       |
| Yes                                                                          | 1112 (95.2) | 1428 (94.6) | 0.453 |
| No                                                                           | 56 (4.8)    | 82 (5.4)    |       |
| Previous help-seeking                                                        |             |             |       |
| No                                                                           | 971 (83.1)  | 1236 (82.0) | 0.451 |
| Yes                                                                          | 197 (16.9)  | 271 (18.0)  |       |
| Discussion of child social and emotional development in the well-child visit |             |             |       |
| No                                                                           | 1010 (86.5) | 1287 (85.4) | 0.430 |
| Yes                                                                          | 158 (13.5)  | 220 (14.6)  |       |

a. General health of the child was measured by the 4-item subscale General Health of the Infant Toddler Quality of Life Questionnaire (47 items).

b. Parental satisfaction of child's development was measured by the 5-item subscale Satisfaction of Child's Development of the Infant Toddler Quality of Life Questionnaire (47 items).

Abbreviation: BITSEA= Brief Infant-Toddler Social and Emotional Assessment.

P values are based on the independent chi-square test for complete data and imputed data groups.

STROBE Statement—Checklist of items that should be included in reports of *cohort studies*

|                           | Item No | Recommendation                                                                                                                                                                                    | Page No |
|---------------------------|---------|---------------------------------------------------------------------------------------------------------------------------------------------------------------------------------------------------|---------|
| <b>Title and abstract</b> | 1       | (a) Indicate the study's design with a commonly used term in the title or the abstract                                                                                                            | 1       |
|                           |         | (b) Provide in the abstract an informative and balanced summary of what was done and what was found                                                                                               | 2       |
| <b>Introduction</b>       |         |                                                                                                                                                                                                   |         |
| Background/rationale      | 2       | Explain the scientific background and rationale for the investigation being reported                                                                                                              | 3,4     |
| Objectives                | 3       | State specific objectives, including any prespecified hypotheses                                                                                                                                  | 4       |
| <b>Methods</b>            |         |                                                                                                                                                                                                   |         |
| Study design              | 4       | Present key elements of study design early in the paper                                                                                                                                           | 4       |
| Setting                   | 5       | Describe the setting, locations, and relevant dates, including periods of recruitment, exposure, follow-up, and data collection                                                                   | 4,5     |
| Participants              | 6       | (a) Give the eligibility criteria, and the sources and methods of selection of participants. Describe methods of follow-up                                                                        | 5       |
|                           |         | (b) For matched studies, give matching criteria and number of exposed and unexposed                                                                                                               | -       |
| Variables                 | 7       | Clearly define all outcomes, exposures, predictors, potential confounders, and effect modifiers. Give diagnostic criteria, if applicable                                                          | 5,6,7   |
| Data sources/measurement  | 8*      | For each variable of interest, give sources of data and details of methods of assessment (measurement). Describe comparability of assessment methods if there is more than one group              | 5,6,7   |
| Bias                      | 9       | Describe any efforts to address potential sources of bias                                                                                                                                         | 8       |
| Study size                | 10      | Explain how the study size was arrived at                                                                                                                                                         | n/a     |
| Quantitative variables    | 11      | Explain how quantitative variables were handled in the analyses. If applicable, describe which groupings were chosen and why                                                                      | n/a     |
| Statistical methods       | 12      | (a) Describe all statistical methods, including those used to control for confounding                                                                                                             | 8       |
|                           |         | (b) Describe any methods used to examine subgroups and interactions                                                                                                                               | 8       |
|                           |         | (c) Explain how missing data were addressed                                                                                                                                                       | 8       |
|                           |         | (d) If applicable, explain how loss to follow-up was addressed                                                                                                                                    | 8       |
|                           |         | (e) Describe any sensitivity analyses                                                                                                                                                             | 8       |
| <b>Results</b>            |         |                                                                                                                                                                                                   |         |
| Participants              | 13*     | (a) Report numbers of individuals at each stage of study—eg numbers potentially eligible, examined for eligibility, confirmed eligible, included in the study, completing follow-up, and analysed | 5       |
|                           |         | (b) Give reasons for non-participation at each stage                                                                                                                                              | 5       |
|                           |         | (c) Consider use of a flow diagram                                                                                                                                                                | Figur2  |
| Descriptive data          | 14*     | (a) Give characteristics of study participants (eg demographic, clinical, social) and information on exposures and potential confounders                                                          | 10      |
|                           |         | (b) Indicate number of participants with missing data for each variable of interest                                                                                                               | 10      |
|                           |         | (c) Summarise follow-up time (eg, average and total amount)                                                                                                                                       | 5       |
| Outcome data              | 15*     | Report numbers of outcome events or summary measures over time                                                                                                                                    | 10      |

|    |                          |    |                                                                                                                                                                                                              |       |
|----|--------------------------|----|--------------------------------------------------------------------------------------------------------------------------------------------------------------------------------------------------------------|-------|
| 1  | Main results             | 16 | (a) Give unadjusted estimates and, if applicable, confounder-adjusted estimates and their precision (eg, 95% confidence interval). Make clear which confounders were adjusted for and why they were included | 12,13 |
| 2  |                          |    | (b) Report category boundaries when continuous variables were categorized                                                                                                                                    | 5,6,7 |
| 3  |                          |    | (c) If relevant, consider translating estimates of relative risk into absolute risk for a meaningful time period                                                                                             | n/a   |
| 4  |                          |    |                                                                                                                                                                                                              |       |
| 5  | Other analyses           | 17 | Report other analyses done—eg analyses of subgroups and interactions, and sensitivity analyses                                                                                                               | 16    |
| 6  |                          |    |                                                                                                                                                                                                              |       |
| 7  |                          |    |                                                                                                                                                                                                              |       |
| 8  |                          |    |                                                                                                                                                                                                              |       |
| 9  |                          |    |                                                                                                                                                                                                              |       |
| 10 |                          |    |                                                                                                                                                                                                              |       |
| 11 | <b>Discussion</b>        |    |                                                                                                                                                                                                              |       |
| 12 | Key results              | 18 | Summarise key results with reference to study objectives                                                                                                                                                     | 17    |
| 13 | Limitations              | 19 | Discuss limitations of the study, taking into account sources of potential bias or imprecision. Discuss both direction and magnitude of any potential bias                                                   | 19,20 |
| 14 |                          |    |                                                                                                                                                                                                              |       |
| 15 | Interpretation           | 20 | Give a cautious overall interpretation of results considering objectives, limitations, multiplicity of analyses, results from similar studies, and other relevant evidence                                   | 19    |
| 16 |                          |    |                                                                                                                                                                                                              |       |
| 17 | Generalisability         | 21 | Discuss the generalisability (external validity) of the study results                                                                                                                                        | 20    |
| 18 |                          |    |                                                                                                                                                                                                              |       |
| 19 |                          |    |                                                                                                                                                                                                              |       |
| 20 |                          |    |                                                                                                                                                                                                              |       |
| 21 | <b>Other information</b> |    |                                                                                                                                                                                                              |       |
| 22 | Funding                  | 22 | Give the source of funding and the role of the funders for the present study and, if applicable, for the original study on which the present article is based                                                | 21    |
| 23 |                          |    |                                                                                                                                                                                                              |       |
| 24 |                          |    |                                                                                                                                                                                                              |       |
| 25 |                          |    |                                                                                                                                                                                                              |       |

\*Give information separately for exposed and unexposed groups.

**Note:** An Explanation and Elaboration article discusses each checklist item and gives methodological background and published examples of transparent reporting. The STROBE checklist is best used in conjunction with this article (freely available on the Web sites of PLoS Medicine at <http://www.plosmedicine.org/>, Annals of Internal Medicine at <http://www.annals.org/>, and Epidemiology at <http://www.epidem.com/>). Information on the STROBE Initiative is available at <http://www.strobe-statement.org>.
