# Supplementary material for: Correlates of help-seeking by parents for the socioemotional development of their 3-year-old children: a longitudinal study
Source: PubMed Central journal article supplement — BMJ Open. 2022 Jan 11;12(1):e052595. doi: 10.1136/bmjopen-2021-052595 (PMC8753387; doi:10.1136/bmjopen-2021-052595), 2022-01-11
Supplement: bmjopen-2021-052595supp001.pdf [file bmjopen-2021-052595supp001.pdf]

**Supplementary Materials [Tables]**

**Title:** Correlates of help-seeking by parents for the socio-emotional development of their 3-year-old children: a longitudinal study.

**Journal:** BMJ Open

**Authors:** Jie Luo, Hein Raat, Carmen B. Franse, Rienke Bannink, Guannan Bai, Amy van Grieken

**Corresponding Author:** Amy van Grieken, PhD, Department of Public Health, Erasmus University Medical Center, P.O. Box 2040, 3000 CA Rotterdam, The Netherlands, a.vangrieken@erasmusmc.nl.

Supplementary Table S1. *P*-values for interactions between the 13 factors and child gender, child ethnic background, parental age and parental education level on help-seeking (n=1507)

|                                                                          | Child gender   | Child ethnic background | Parental age   | Parental education level |
|--------------------------------------------------------------------------|----------------|-------------------------|----------------|--------------------------|
|                                                                          | <i>p</i> value | <i>p</i> value          | <i>p</i> value | <i>p</i> value           |
| Child gender                                                             | -              | 0.877                   | 0.537          | 0.751                    |
| Child ethnic background                                                  | 0.877          | -                       | 0.049          | 0.981                    |
| Parental age                                                             | 0.537          | 0.049                   | -              | 0.829                    |
| Parental education level                                                 | 0.751          | 0.981                   | 0.829          | -                        |
| Parental work status                                                     | 0.325          | 0.909                   | 0.841          | 0.069                    |
| Family composition                                                       | 0.226          | 0.078                   | 0.887          | 0.194                    |
| BITSEA Problem scale score                                               | 0.419          | 0.373                   | 0.074          | 0.969                    |
| BITSEA Competence scale score                                            | 0.414          | 0.853                   | 0.406          | 0.100                    |
| Stressful life events                                                    | 0.003          | 0.518                   | 0.786          | 0.033                    |
| General health of the child                                              | 0.893          | 0.171                   | 0.442          | 0.271                    |
| Parental satisfaction of child's development                             | 0.446          | 0.307                   | 0.350          | 0.347                    |
| Previous help-seeking behavior                                           | 0.274          | 0.619                   | 0.159          | 0.567                    |
| Discussion of child social-emotional development in the well-child visit | 0.552          | 0.193                   | 0.126          | 0.731                    |

Note: numbers in table are *p*-values of interaction of the variables in rows and columns.

Abbreviations: BITSEA= Brief Infant–Toddler Social and Emotional Assessment.

Multivariate logistic regression was adopted for interaction analyses in the full model with predisposing variables, enabling variables and need variables as independent variables. After applying Bonferroni correction for multiple testing ( $P=0.05/42=0.001$ ), no statistically significant interaction was found.

Supplementary Table S2. Non-response analyses (n = 2305)

|                          | Total<br>(n=2305)<br>Mean ± SD N(%) | Response to follow-up              |                                      | p value |
|--------------------------|-------------------------------------|------------------------------------|--------------------------------------|---------|
|                          |                                     | No<br>(n=765)<br>Mean ± SD<br>N(%) | Yes<br>(n=1540)<br>Mean ± SD<br>N(%) |         |
| Child age in months      | 24.6±1.8                            | 24.8±1.6                           | 24.5±1.8                             | <0.001  |
| Child gender             |                                     |                                    |                                      | 0.155   |
| Boy                      | 1159 (50.6)                         | 401 (52.7)                         | 758 (49.5)                           |         |
| Girl                     | 1132 (49.4)                         | 360 (47.3)                         | 772 (50.5)                           |         |
| Child ethnic background  |                                     |                                    |                                      | <0.001  |
| Dutch                    | 1576 (73.3)                         | 415 (58.9)                         | 1161 (80.2)                          |         |
| Other-western            | 166 (7.7)                           | 59 (8.4)                           | 107 (7.4)                            |         |
| Non-western              | 409 (19.0)                          | 230 (32.7)                         | 179 (12.4)                           |         |
| Parental age in year     |                                     |                                    |                                      | <0.001  |
| >=40                     | 262 (22.6)                          | 89 (11.8)                          | 173 (11.3)                           |         |
| 30-39                    | 1500 (65.9)                         | 438 (58.2)                         | 1062 (69.6)                          |         |
| <29                      | 515 (11.5)                          | 225 (29.9)                         | 290 (19.0)                           |         |
| Parental education level |                                     |                                    |                                      | <0.001  |
| High                     | 1175 (52.8)                         | 282 (39.1)                         | 893 (59.5)                           |         |
| Middle                   | 858 (38.6)                          | 345 (47.8)                         | 513 (34.2)                           |         |
| Low                      | 191 (8.6)                           | 95 (13.2)                          | 96 (6.4)                             |         |

Note: This table present non-imputed data. The missing numbers of variables are child age (n=32), child gender (n=14), child ethnic background (n=154), parental age (n=28), parental educational level (n=81).

Abbreviation: SD=standard deviation.

P values are based on Independent t-test and chi-square test for non-response to follow-up and response groups.

Supplementary Table S3. McNemar's test for homogeneity of formal sources use and informal sources use (n=341)

|                           | Informal sources use |              | p value |
|---------------------------|----------------------|--------------|---------|
|                           | Yes<br>(n=264)       | No<br>(n=77) |         |
| <b>Formal sources use</b> |                      |              |         |
| Yes (n=103)               | 26                   | 77           | <0.001  |
| No (n=238)                | 238                  | 0            |         |

P value is based on the McNemar's test.

Supplementary Table S4. Characteristics of the study population by use of formal and informal sources in parental help-seeking (n=1507)

|                               | Total                         | Use of formal sources               |                                     | <i>p</i> value | Use of Informal sources             |                                     | <i>p</i> value |
|-------------------------------|-------------------------------|-------------------------------------|-------------------------------------|----------------|-------------------------------------|-------------------------------------|----------------|
|                               | (n=1507)<br>Mean ± SD<br>N(%) | No<br>(n=1404)<br>Mean ± SD<br>N(%) | Yes<br>(n=103)<br>Mean ± SD<br>N(%) |                | No<br>(n=1243)<br>Mean ± SD<br>N(%) | Yes<br>(n=264)<br>Mean ± SD<br>N(%) |                |
| <b>Predisposing Factors</b>   |                               |                                     |                                     |                |                                     |                                     |                |
| Child age in month            | 24.5±1.8                      | 24.5±1.9                            | 24.5±1.6                            | 0.920          | 24.5±1.8                            | 24.5±2.0                            | 0.593          |
| Child gender                  |                               |                                     |                                     | 0.029          |                                     |                                     | 0.648          |
| Boys                          | 739 (49.4)                    | 678 (48.6)                          | 61 (59.8)                           |                | 614 (49.6)                          | 125 (48.1)                          |                |
| Girls                         | 758 (50.6)                    | 717 (51.4)                          | 41 (40.2)                           |                | 623 (50.4)                          | 135 (51.9)                          |                |
| Child ethnic background       |                               |                                     |                                     | 0.020          |                                     |                                     | 0.508          |
| Dutch                         | 1161 (80.2)                   | 1093 (81.0)                         | 68 (69.4)                           |                | 966 (80.8)                          | 195 (77.7)                          |                |
| Other-western                 | 107 (7.4)                     | 96 (7.1)                            | 11 (11.2)                           |                | 85 (7.1)                            | 22 (8.8)                            |                |
| Non-western                   | 179 (12.4)                    | 160 (11.9)                          | 19 (19.4)                           |                | 145 (12.1)                          | 34 (13.5)                           |                |
| Parental age in year          |                               |                                     |                                     | 0.285          |                                     |                                     | 0.001          |
| >=40                          | 166 (11.1)                    | 155 (11.1)                          | 11 (10.9)                           |                | 149 (12.1)                          | 17 (6.5)                            |                |
| 30-39                         | 1048 (70.1)                   | 983 (70.5)                          | 65 (64.4)                           |                | 870 (70.6)                          | 178 (67.7)                          |                |
| <29                           | 282 (18.9)                    | 257 (18.4)                          | 25 (24.8)                           |                | 214 (17.4)                          | 68 (25.9)                           |                |
| <b>Enabling Factors</b>       |                               |                                     |                                     |                |                                     |                                     |                |
| Parental education level      |                               |                                     |                                     | 0.001          |                                     |                                     | 0.170          |
| High                          | 883 (59.9)                    | 841 (61.1)                          | 42 (43.3)                           |                | 740 (61.1)                          | 143 (54.8)                          |                |
| Middle                        | 498 (33.8)                    | 449 (32.6)                          | 49 (50.5)                           |                | 399 (32.9)                          | 99 (37.9)                           |                |
| Low                           | 92 (6.2)                      | 86 (6.3)                            | 6 (6.2)                             |                | 73 (6.0)                            | 19 (7.3)                            |                |
| Parental work status          |                               |                                     |                                     | 0.006          |                                     |                                     | 0.015          |
| Employed                      | 1213(81.2)                    | 1125 (82.5)                         | 70 (71.4)                           |                | 996 (82.9)                          | 199 (76.5)                          |                |
| Unemployed                    | 280 (18.8)                    | 238 (17.5)                          | 28 (28.6)                           |                | 205 (17.1)                          | 61 (23.5)                           |                |
| Family composition            |                               |                                     |                                     | 0.210          |                                     |                                     | 0.054          |
| Two-parent family             | 1386 (93.8)                   | 1297 (94.0)                         | 89 (90.8)                           |                | 1149 (94.3)                         | 237 (91.2)                          |                |
| Single-parent family          | 92 (6.2)                      | 83 (6.0)                            | 9 (9.2)                             |                | 69 (5.7)                            | 23 (8.8)                            |                |
| <b>Need Factors</b>           |                               |                                     |                                     |                |                                     |                                     |                |
| BITSEA Problem scale score    |                               |                                     |                                     | <0.001         |                                     |                                     | 0.021          |
| No risk                       | 1400 (94.0)                   | 1319 (95.0)                         | 81 (80.2)                           |                | 1161 (94.6)                         | 239 (90.9)                          |                |
| At risk                       | 92 (6.0)                      | 70 (5.0)                            | 20 (19.8)                           |                | 66 (5.4)                            | 24 (9.1)                            |                |
| BITSEA Competence scale score |                               |                                     |                                     | 0.001          |                                     |                                     | 0.352          |
| No risk                       | 1300 (88.0)                   | 1222 (88.7)                         | 78 (77.2)                           |                | 1074 (88.3)                         | 226 (86.3)                          |                |
| At risk                       | 178 (12.0)                    | 155(11.3)                           | 23(22.8)                            |                | 142 (11.7)                          | 36 (13.7)                           |                |

|                                                                         |             |             |           |        |             |            |        |
|-------------------------------------------------------------------------|-------------|-------------|-----------|--------|-------------|------------|--------|
| Stressful life events                                                   |             |             |           | 0.048  |             |            | 0.001  |
| No                                                                      | 749 (51.0)  | 708 (51.7)  | 41 (41.4) |        | 641 (53.0)  | 108 (41.7) |        |
| Yes                                                                     | 720 (49.0)  | 662 (48.3)  | 58 (58.6) |        | 569 (47.0)  | 151 (58.3) |        |
| General health of the child <sup>a</sup>                                |             |             |           | 0.007  |             |            | 0.153  |
| Good                                                                    | 1370 (92.2) | 1283(92.7)  | 87 (85.3) |        | 1135 (92.7) | 235 (90.0) |        |
| Poor                                                                    | 116 (7.8)   | 101 (7.3)   | 15 (14.7) |        | 90 (7.3)    | 26 (10.0)  |        |
| Parental satisfaction of child's development <sup>b</sup>               |             |             |           | <0.001 |             |            | 0.366  |
| Yes                                                                     | 1380 (94.7) | 1297(95.6)  | 83 (81.4) |        | 1135 (94.9) | 245 (93.5) |        |
| No                                                                      | 78 (5.3)    | 59(4.4)     | 19 (18.6) |        | 61 (5.1)    | 17 (6.5)   |        |
| Previous help-seeking                                                   |             |             |           | <0.001 |             |            | <0.001 |
| No                                                                      | 1208 (82.2) | 1151 (83.9) | 57 (58.8) |        | 1039 (85.8) | 169 (65.5) |        |
| Yes                                                                     | 261 (17.8)  | 221 (16.1)  | 40 (41.2) |        | 172 (14.2)  | 89 (34.5)  |        |
| Discussion of child socio-emotional development in the well-child visit |             |             |           | <0.001 |             |            | <0.001 |
| No                                                                      | 1196 (85.6) | 1148 (88.0) | 48 (52.2) |        | 1017 (87.6) | 179 (75.8) |        |
| Yes                                                                     | 201 (14.4)  | 157 (12.0)  | 44 (47.8) |        | 144 (12.4)  | 57 (24.2)  |        |

Note: This table presents non-imputed data. The missing numbers of variables are parental age (n=11), child gender (n=10), child ethnic background (n=60), parental educational level (n=34), parental work status (n=46), family composition (n=29), BITSEA Problem scale score (n=17), BITSEA Competence scale score (n=29), stressful life events (n=38), general health of the child (n=21), parental satisfaction of child's development (n=49), previous help-seeking (n=38), and discussion of child socio-emotional development in the well-child visit (n=110).

Data presented as mean ± SD or number (percentage). Significant differences between two subgroups of help-seeking and non-help-seeking parents were evaluated at 0.05 level using independent T tests for continuous variables and  $\chi^2$  tests for categorical variables.

a. General health of the child was measured by the 4-item subscale General Health of the Infant Toddler Quality of Life Questionnaire (47 items).

b. Parental satisfaction of child's development was measured by the 5-item subscale Satisfaction of Child's Development of the Infant Toddler Quality of Life Questionnaire (47 items).

Abbreviation: SD=standard deviation; BITSEA= Brief Infant–Toddler Social and Emotional Assessment.

The bold print indicates  $p < 0.05$ .

Supplementary Table S5. Multivariate logistic regression model on independent factors and help-seeking with complete data (n=1168)

|                               | <b>Model 1</b>         |           | <b>Model 2</b>          |           | <b>Model 3</b>      |           |
|-------------------------------|------------------------|-----------|-------------------------|-----------|---------------------|-----------|
|                               | Predisposing variables |           | Plus enabling variables |           | Plus need variables |           |
|                               | $\chi^2 = 22.08$       |           | $\chi^2 = 14.11$        |           | $\chi^2 = 93.56$    |           |
|                               | OR                     | 95% CI    | OR                      | 95% CI    | OR                  | 95% CI    |
| <b>Predisposing Factors</b>   |                        |           |                         |           |                     |           |
| Child gender                  |                        |           |                         |           |                     |           |
| Boy                           | Ref                    |           | Ref                     |           | Ref                 |           |
| Girl                          | 0.86                   | 0.65-1.14 | 0.86                    | 0.65-1.14 | 0.93                | 0.69-1.25 |
| Child ethnic background       |                        |           |                         |           |                     |           |
| Dutch                         | Ref                    |           | Ref                     |           | Ref                 |           |
| Other-western                 | 1.51                   | 0.90-2.54 | 1.45                    | 0.86-2.44 | 1.51                | 0.87-2.63 |
| Non-western                   | 1.52                   | 1.00-2.33 | 1.21                    | 0.77-1.90 | 1.18                | 0.72-1.91 |
| Parental age in year          |                        |           |                         |           |                     |           |
| $\geq 40$                     | Ref                    |           | Ref                     |           | Ref                 |           |
| 30-39                         | 1.67                   | 0.97-2.88 | 1.72                    | 0.99-2.96 | 1.51                | 0.86-2.65 |
| $\leq 29$                     | 2.87***                | 1.59-5.18 | 2.53**                  | 1.39-4.59 | 2.23*               | 1.20-4.15 |
| <b>Enabling Factors</b>       |                        |           |                         |           |                     |           |
| Parental education level      |                        |           |                         |           |                     |           |
| High                          |                        |           | Ref                     |           | Ref                 |           |
| Middle                        |                        |           | 1.27                    | 0.93-1.73 | 1.24                | 0.89-1.71 |
| Low                           |                        |           | 1.00                    | 0.52-1.94 | 0.93                | 0.46-1.87 |
| Parental work status          |                        |           |                         |           |                     |           |
| Employed                      |                        |           | Ref                     |           | Ref                 |           |
| Unemployed                    |                        |           | 1.59*                   | 1.11-2.27 | 1.32                | 0.90-1.95 |
| Family composition            |                        |           |                         |           |                     |           |
| Two-parent family             |                        |           | Ref                     |           | Ref                 |           |
| Single-parent family          |                        |           | 1.66                    | 0.91-3.03 | 1.46                | 0.77-2.75 |
| <b>Need Factors</b>           |                        |           |                         |           |                     |           |
| BITSEA Problem scale score    |                        |           |                         |           |                     |           |
| No risk                       |                        |           |                         |           | Ref                 |           |
| At risk                       |                        |           |                         |           | 0.96                | 0.51-1.81 |
| BITSEA Competence scale score |                        |           |                         |           |                     |           |
| No risk                       |                        |           |                         |           | Ref                 |           |
| At risk                       |                        |           |                         |           | 1.35                | 0.85-2.14 |
| Stressful life events         |                        |           |                         |           |                     |           |
| No                            |                        |           |                         |           | Ref                 |           |

|                                                                              |         |           |
|------------------------------------------------------------------------------|---------|-----------|
| Yes                                                                          | 1.45*   | 1.07-1.96 |
| General health of the child <sup>a</sup>                                     |         |           |
| Good                                                                         | Ref     |           |
| Poor                                                                         | 1.25    | 0.73-2.14 |
| Parental satisfaction of child's development <sup>b</sup>                    |         |           |
| Yes                                                                          | Ref     |           |
| No                                                                           | 1.58    | 0.81-3.09 |
| Previous help-seeking                                                        |         |           |
| No                                                                           | Ref     |           |
| Yes                                                                          | 2.71*** | 1.90-3.88 |
| Discussion of child social and emotional development in the well-child visit |         |           |
| No                                                                           | Ref     |           |
| Yes                                                                          | 2.67*** | 1.82-3.92 |

Model 1: The model with predisposing factors as independent variables.

Model 2: The model with predisposing and enabling factors as independent variables.

Model 3: The full model with predisposing, enabling, and need factors as independent variables.

a. General health of the child was measured by the 4-item subscale General Health of the Infant Toddler Quality of Life Questionnaire (47 items).

b. Parental satisfaction of child's development was measured by the 5-item subscale Satisfaction of Child's Development of the Infant Toddler Quality of Life Questionnaire (47 items).

Abbreviation: OR=Odds Ratio; CI=Confidence Interval; BITSEA= Brief Infant-Toddler Social and Emotional Assessment.

\*  $p < 0.05$ ; \*\*  $p < 0.01$ ; \*\*\*  $p < 0.001$ .

Supplementary Table S6. Chi-square test for homogeneity of complete data and imputed data

|                                          | Complete data<br>(n=1168)<br>N(%) | Imputed data<br>(n=1507)<br>N(%) | <i>p</i> value |
|------------------------------------------|-----------------------------------|----------------------------------|----------------|
| <b>Predisposing Factors</b>              |                                   |                                  |                |
| Child gender                             |                                   |                                  |                |
| Boy                                      | 569 (48.7)                        | 744 (49.4)                       | 0.737          |
| Girl                                     | 599 (51.3)                        | 763 (50.6)                       |                |
| Child ethnic background                  |                                   |                                  |                |
| Dutch                                    | 959 (82.1)                        | 1202(79.8)                       | 0.260          |
| Other-western                            | 83 (7.1)                          | 113 (7.5)                        |                |
| Non-western                              | 126 (10.8)                        | 192 (12.7)                       |                |
| Parental age in year                     |                                   |                                  |                |
| >=40                                     | 123 (10.5)                        | 167 (11.1)                       | 0.899          |
| 30-39                                    | 825 (70.6)                        | 1056 (70.1)                      |                |
| =<29                                     | 220 (18.8)                        | 284 (18.8)                       |                |
| <b>Enabling Factors</b>                  |                                   |                                  |                |
| Parental education level                 |                                   |                                  |                |
| High                                     | 717 (61.4)                        | 901 (59.8)                       | 0.394          |
| Middle                                   | 391 (33.5)                        | 511 (33.9)                       |                |
| Low                                      | 60 (5.1)                          | 95 (6.3)                         |                |
| Parental work status                     |                                   |                                  |                |
| Employed                                 | 958 (82.0)                        | 1227 (81.4)                      | 0.690          |
| Unemployed                               | 210 (18.0)                        | 280 (18.6)                       |                |
| Family composition                       |                                   |                                  |                |
| Two-parent family                        | 1111 (95.1)                       | 1407 (93.4)                      | 0.055          |
| Single-parent family                     | 57 (4.9)                          | 100 (6.6)                        |                |
| <b>Need Factors</b>                      |                                   |                                  |                |
| BITSEA Problem scale score               |                                   |                                  |                |
| No risk                                  | 1103 (94.4)                       | 1411 (93.6)                      | 0.385          |
| At risk                                  | 65 (5.6)                          | 96 (6.4)                         |                |
| BITSEA Competence scale score            |                                   |                                  |                |
| No risk                                  | 1045 (89.5)                       | 1318 (87.5)                      | 0.108          |
| At risk                                  | 123 (10.5)                        | 189 (12.5)                       |                |
| Stressful life events                    |                                   |                                  |                |
| No                                       | 606 (51.9)                        | 769 (51.0)                       | 0.661          |
| Yes                                      | 562(48.1)                         | 738 (49.0)                       |                |
| General health of the child <sup>a</sup> |                                   |                                  |                |
| Good                                     | 1081 (92.6)                       | 1390 (92.2)                      | 0.761          |



|                                                                              |             |             |       |
|------------------------------------------------------------------------------|-------------|-------------|-------|
| Poor                                                                         | 87 (7.4)    | 117 (7.8)   |       |
| Parental satisfaction of child's development <sup>b</sup>                    |             |             |       |
| Yes                                                                          | 1112 (95.2) | 1428 (94.6) | 0.453 |
| No                                                                           | 56 (4.8)    | 82 (5.4)    |       |
| Previous help-seeking                                                        |             |             |       |
| No                                                                           | 971 (83.1)  | 1236 (82.0) | 0.451 |
| Yes                                                                          | 197 (16.9)  | 271 (18.0)  |       |
| Discussion of child social and emotional development in the well-child visit |             |             |       |
| No                                                                           | 1010 (86.5) | 1287 (85.4) | 0.430 |
| Yes                                                                          | 158 (13.5)  | 220 (14.6)  |       |

a. General health of the child was measured by the 4-item subscale General Health of the Infant Toddler Quality of Life Questionnaire (47 items).

b. Parental satisfaction of child's development was measured by the 5-item subscale Satisfaction of Child's Development of the Infant Toddler Quality of Life Questionnaire (47 items).

Abbreviation: BITSEA= Brief Infant–Toddler Social and Emotional Assessment.

P values are based on the independent chi-square test for complete data and imputed data groups.
